# Supplementary material for: Nitroalkenes as surrogates for cyanomethylium species in a one-pot synthesis of non-symmetric diarylacetonitriles
Source: Royal Society of Chemistry journal article supplement (doi:10.1039/c5ra20953f), 2015-01-01

# Nitroalkenes as surrogates for cyanomethyl cation species in a one-pot synthesis of non-symmetric diarylacetonitriles

Alexander V. Aksenov,<sup>\*a</sup> Nicolai A. Aksenov,<sup>a</sup> Zarema V. Dzhandigova,<sup>a</sup> Dmitrii A. Aksenov,<sup>a</sup>  
and Michael Rubin<sup>\*a,b</sup>

*a. Department of Chemistry, North Caucasus Federal University, 1a Pushkin St., Stavropol 355009, Russian Federation,  
E-mail: alexaks05@rambler.ru; Tel: +7 (918) 743-0255*

*b. Department of Chemistry, University of Kansas, 1251 Wescoe Hall Dr., Lawrence, KS 66045-7582, USA.  
E-mail: mrubin@ku.edu; Fax: +1 (785) 864-5396; Tel: +1 (785) 864-5071*

## Supporting Information

### Table of Content

|                                                          |    |
|----------------------------------------------------------|----|
| <sup>1</sup> H and <sup>13</sup> C Spectral Charts ..... | 2  |
| HRMS Spectral Charts .....                               | 38 |

# $^1\text{H}$ and $^{13}\text{C}$ Spectral Charts

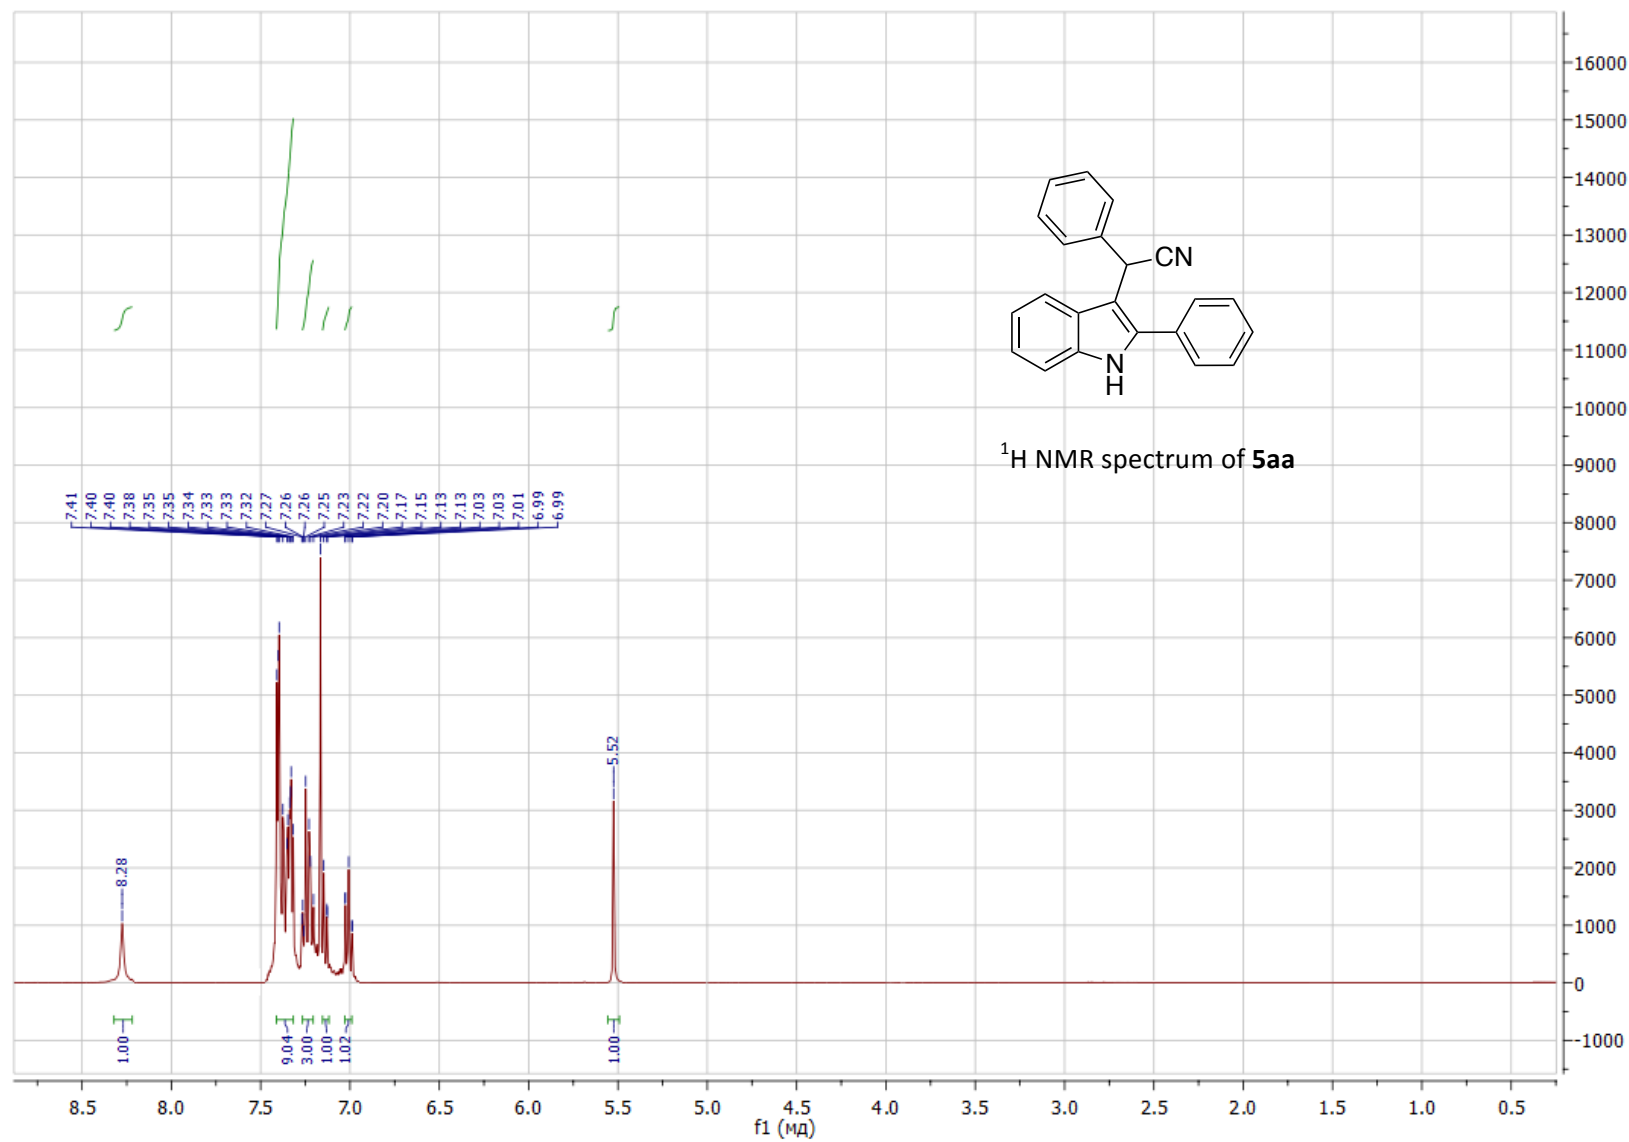

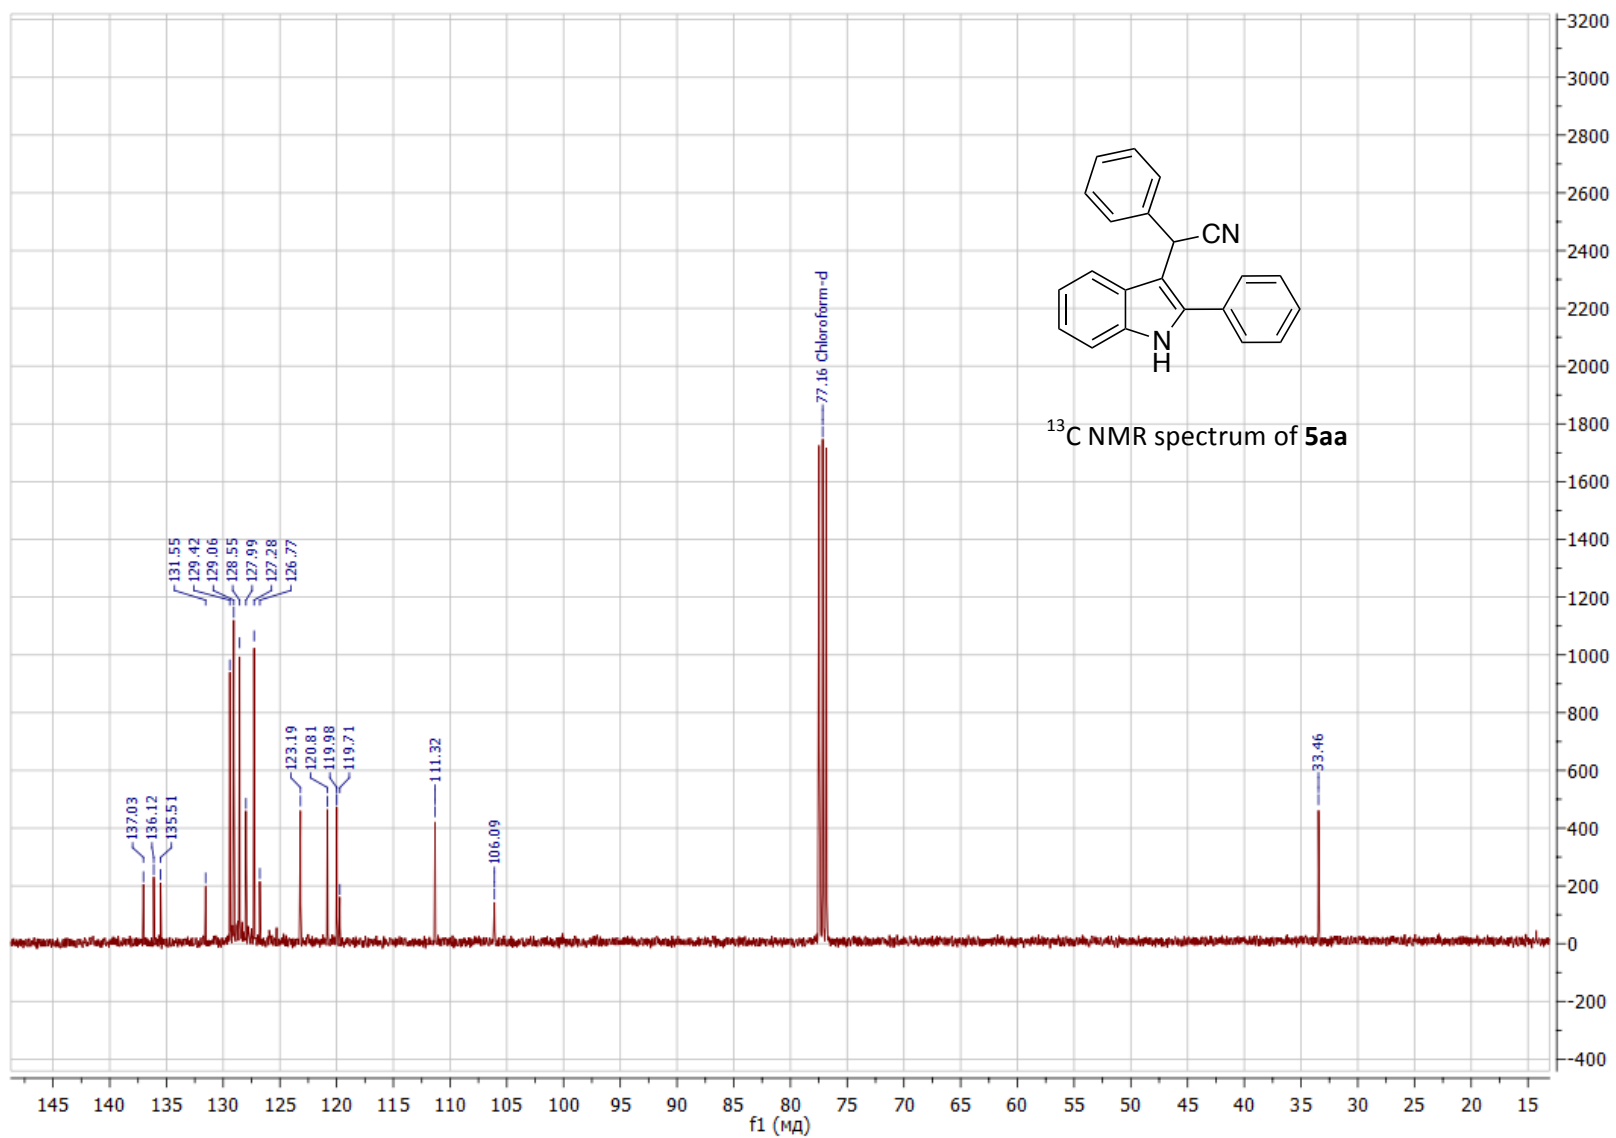

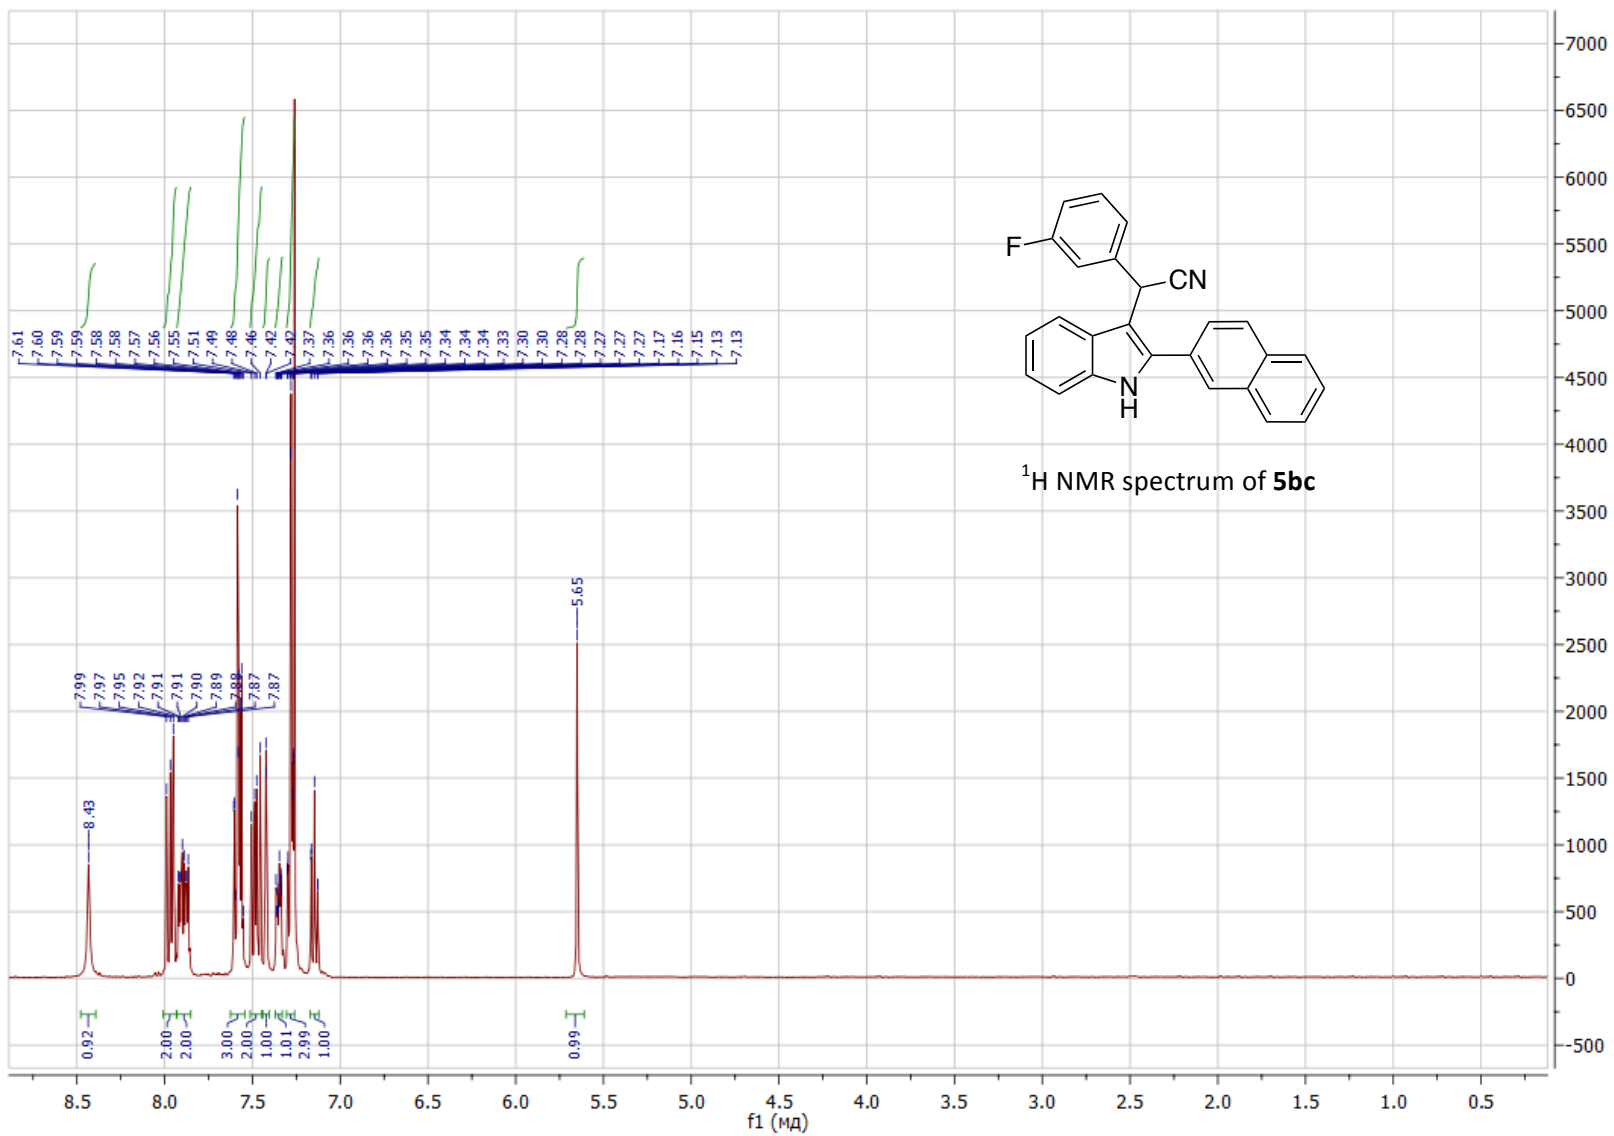

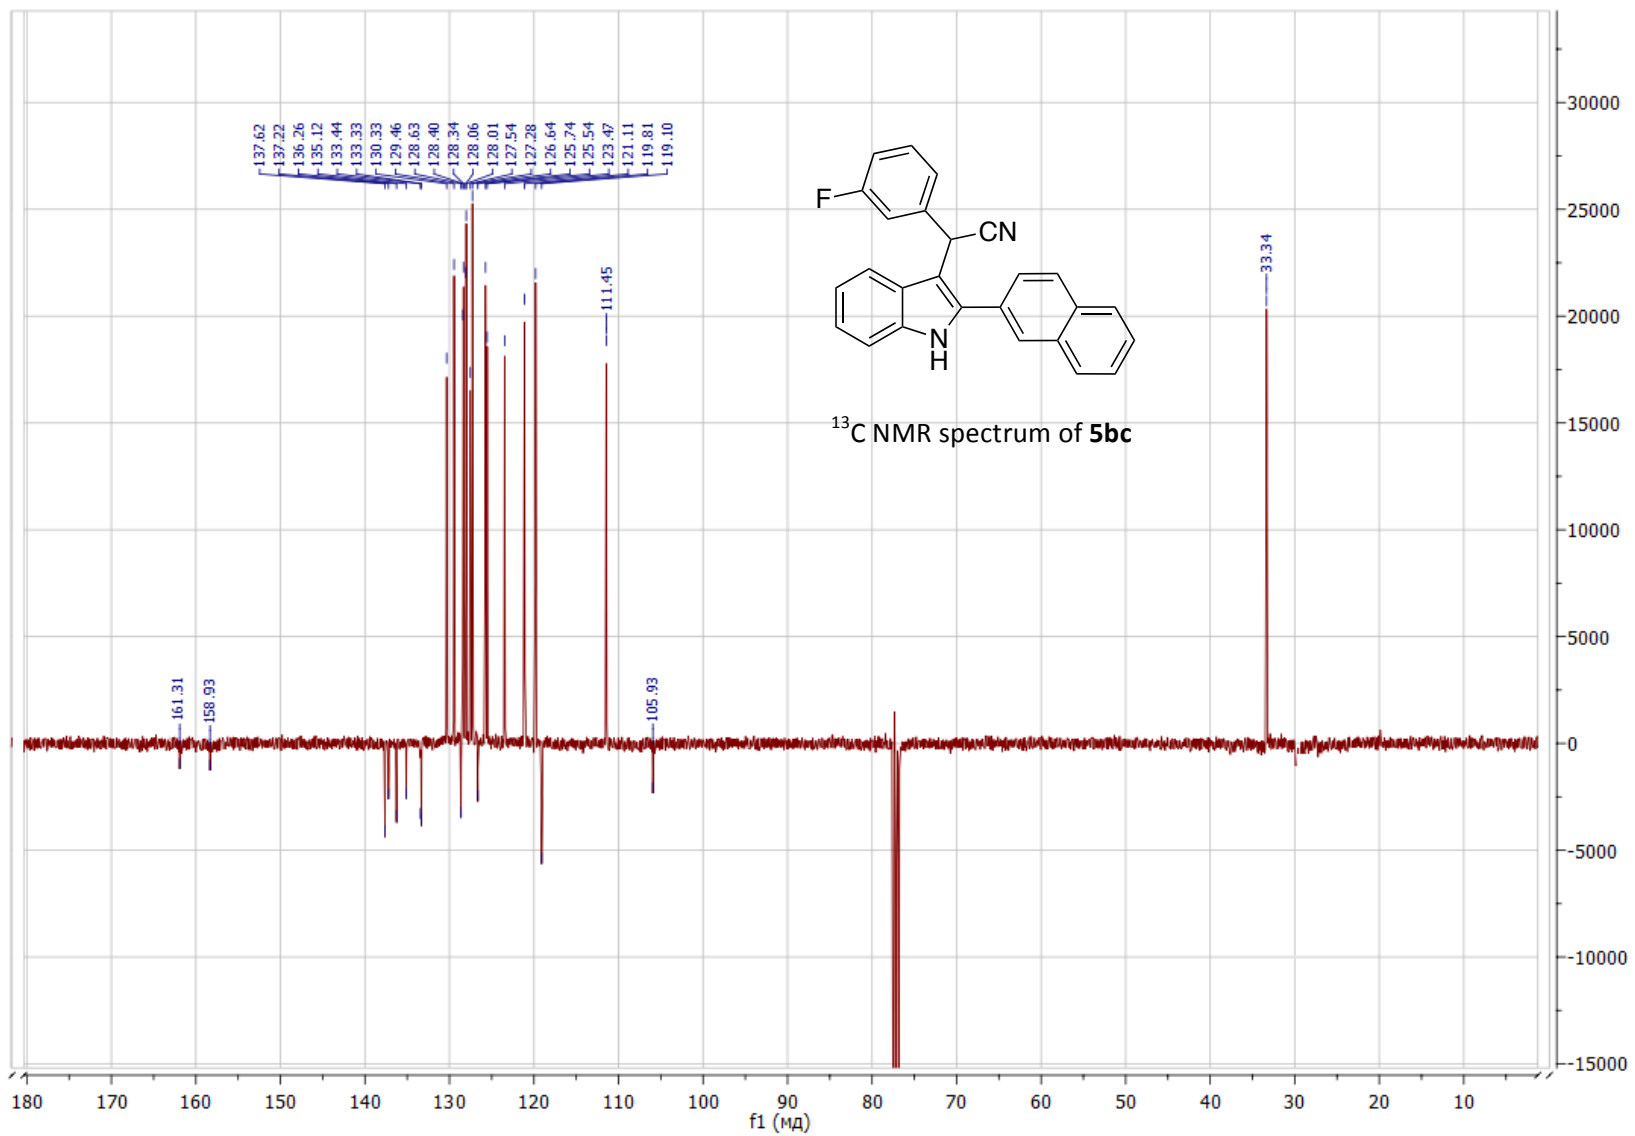

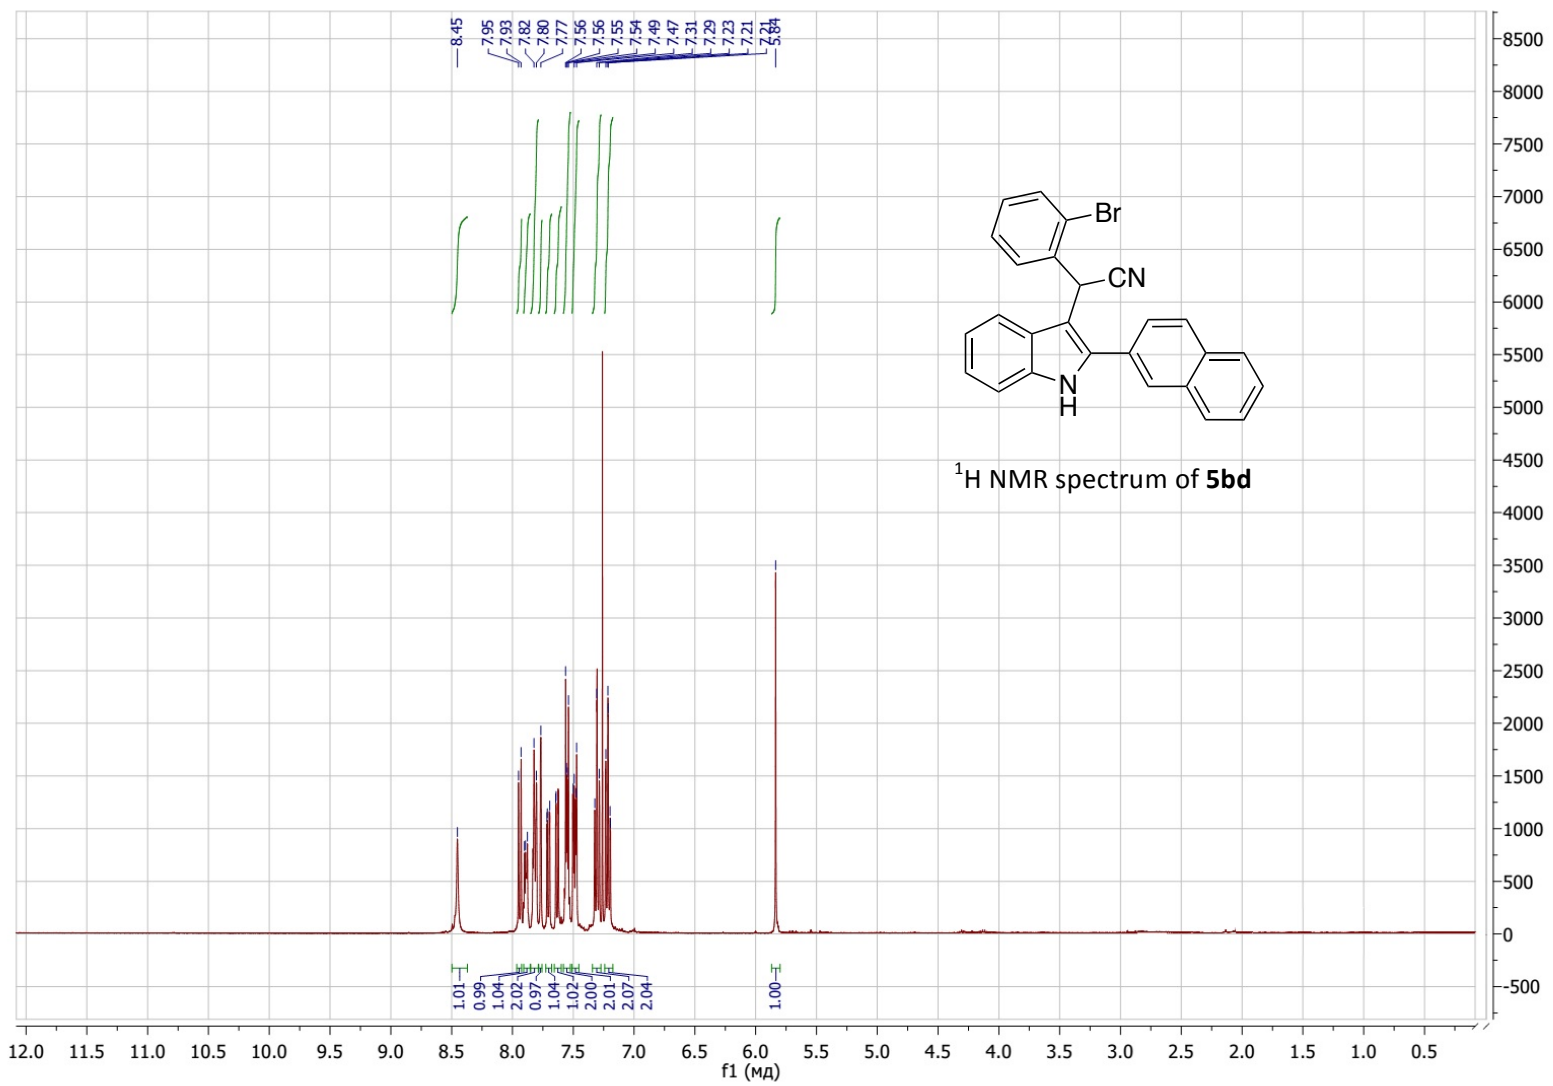

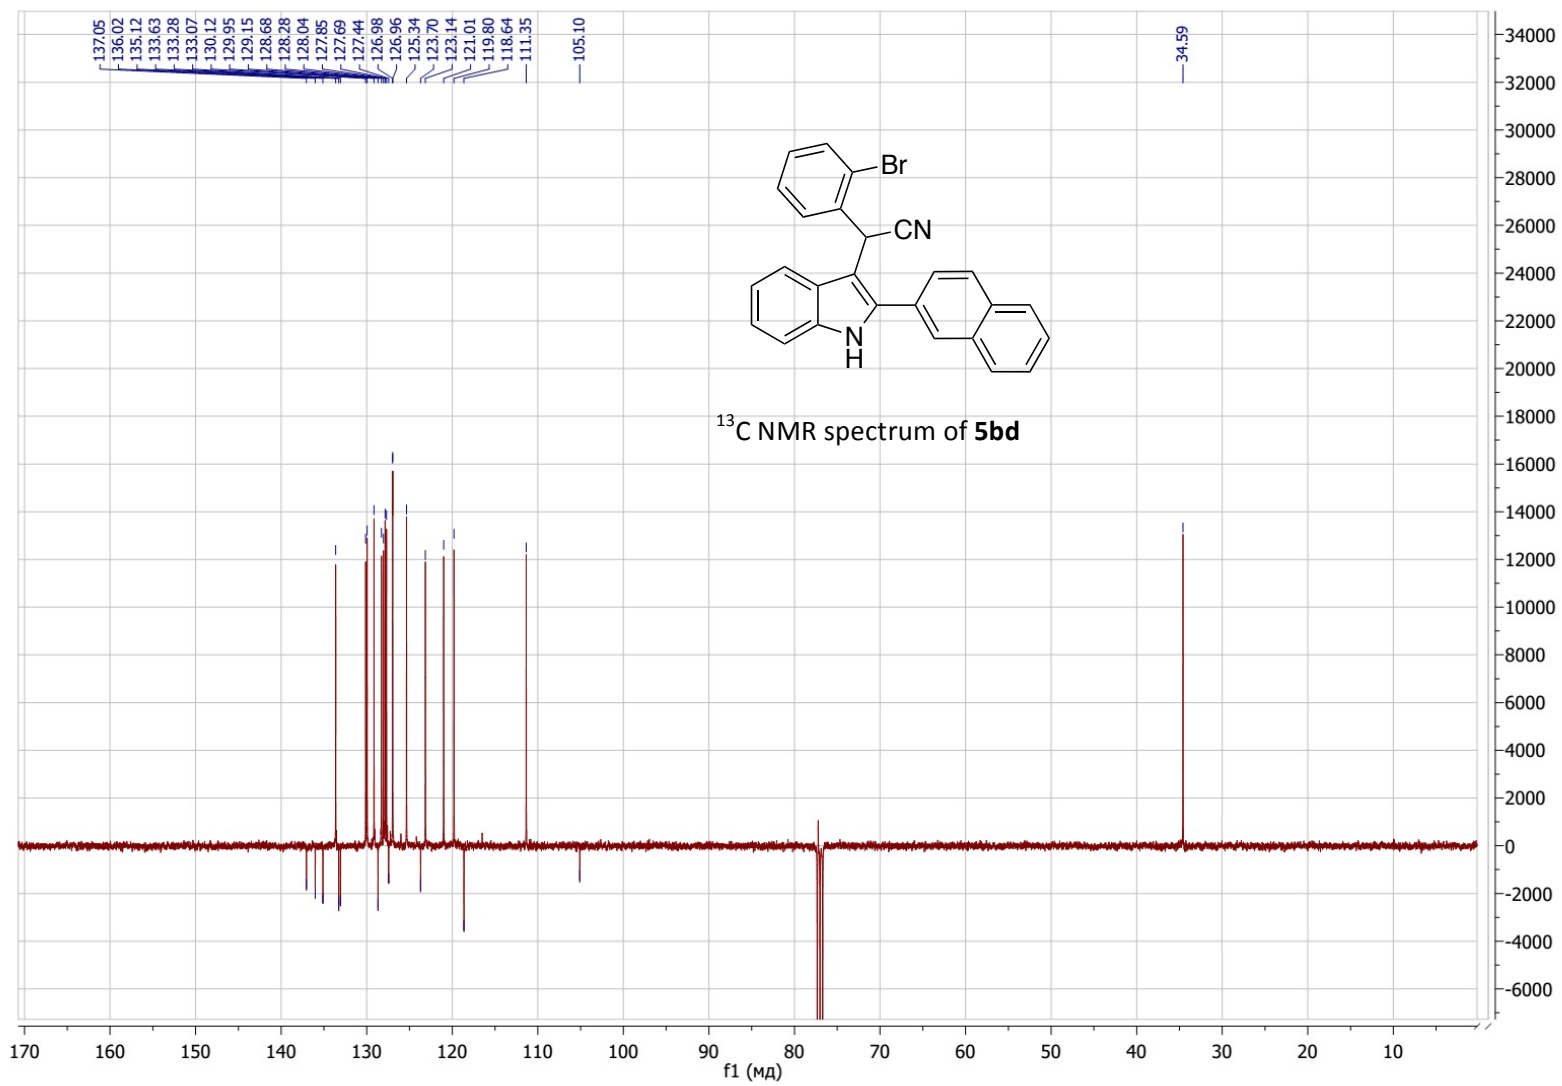

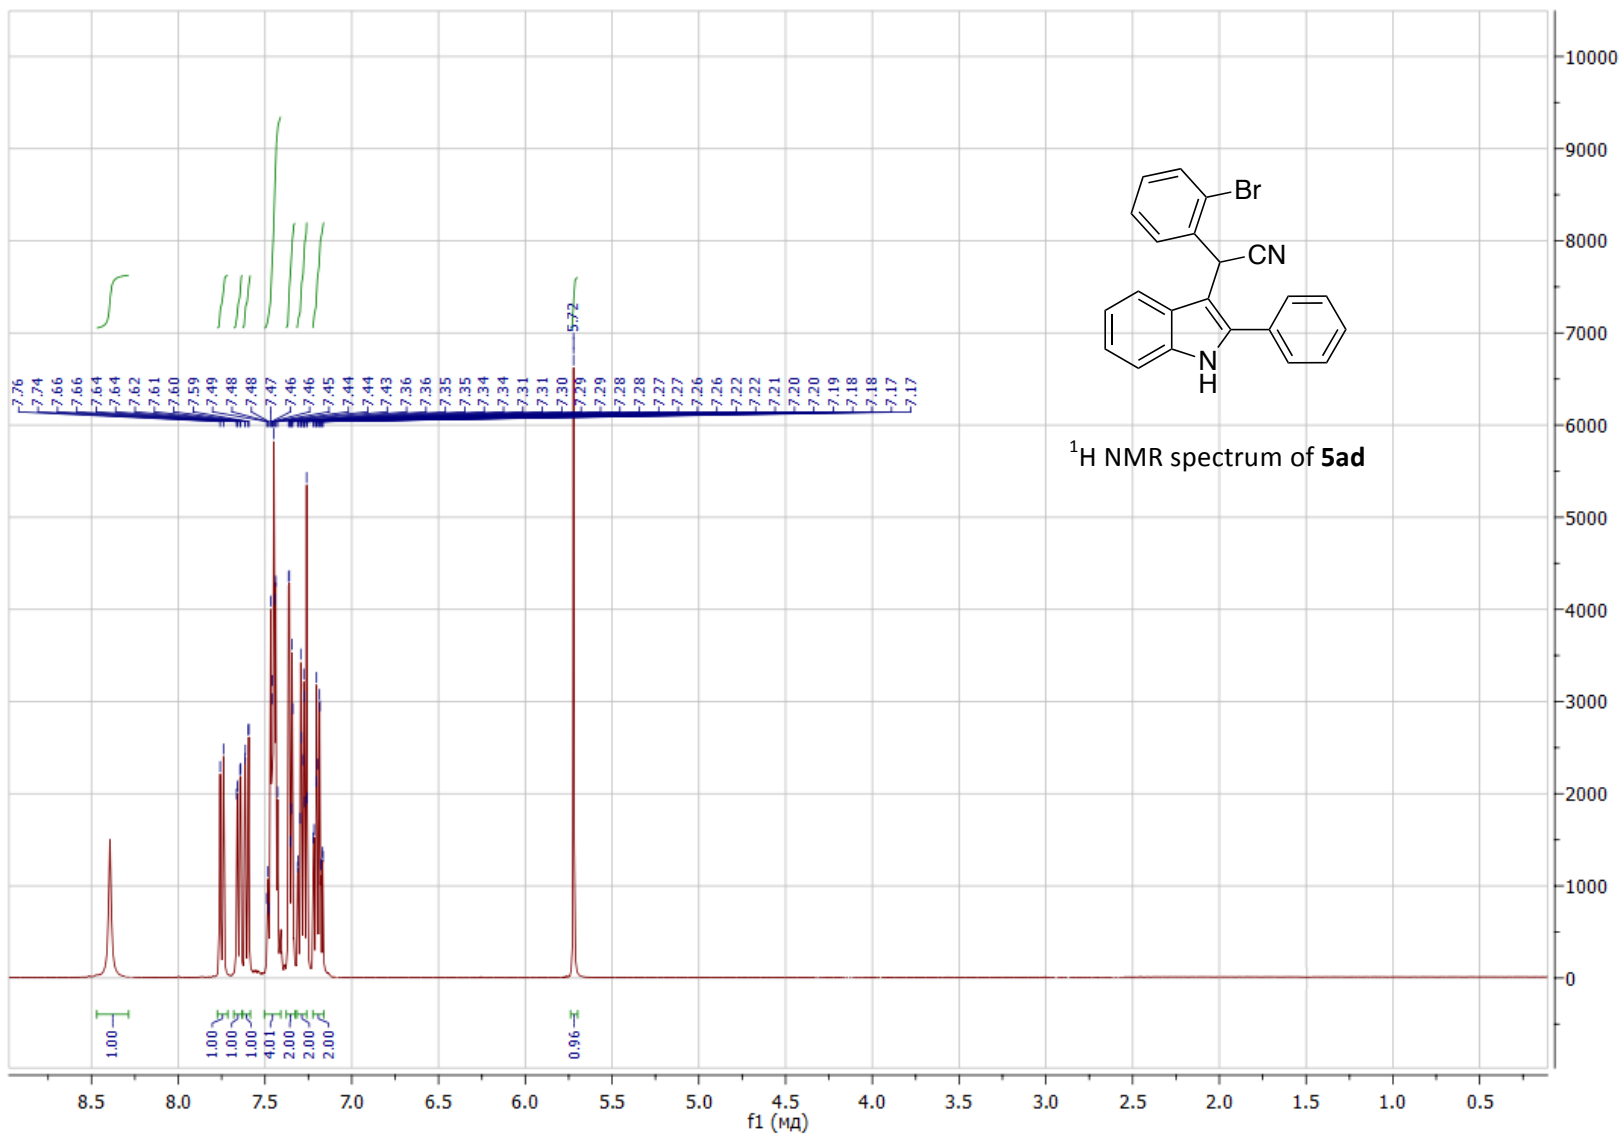



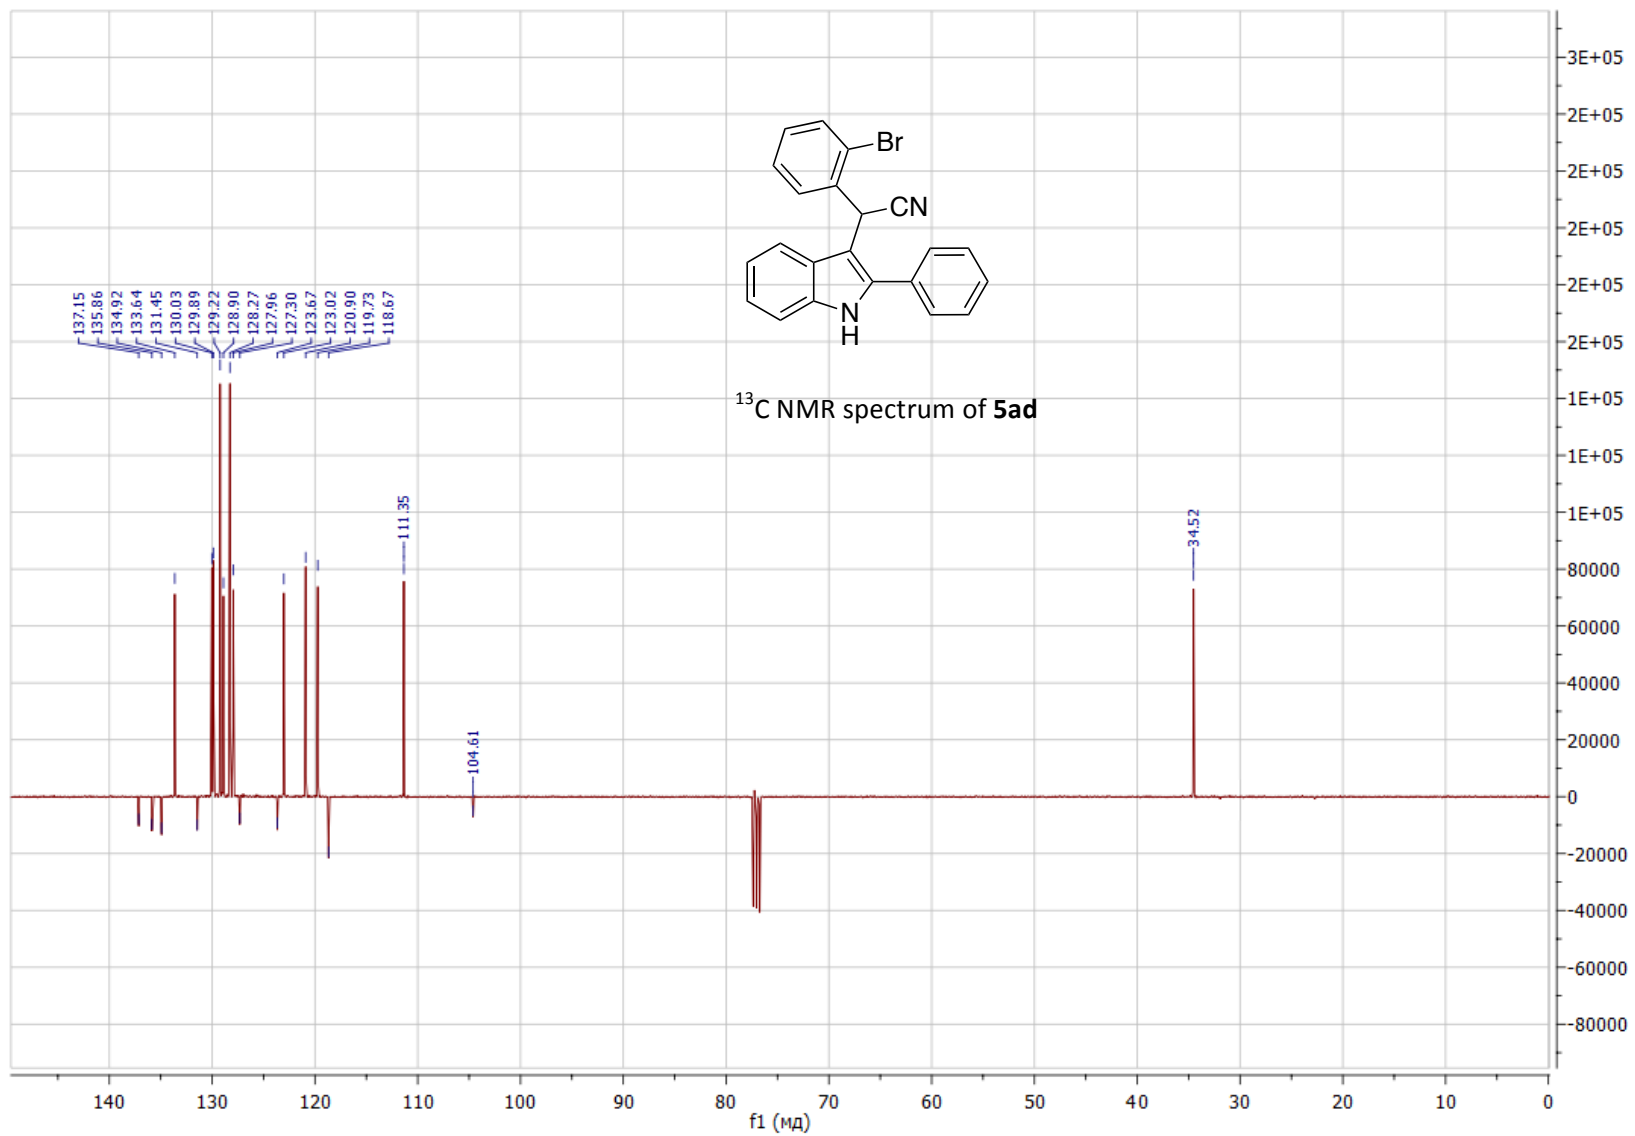

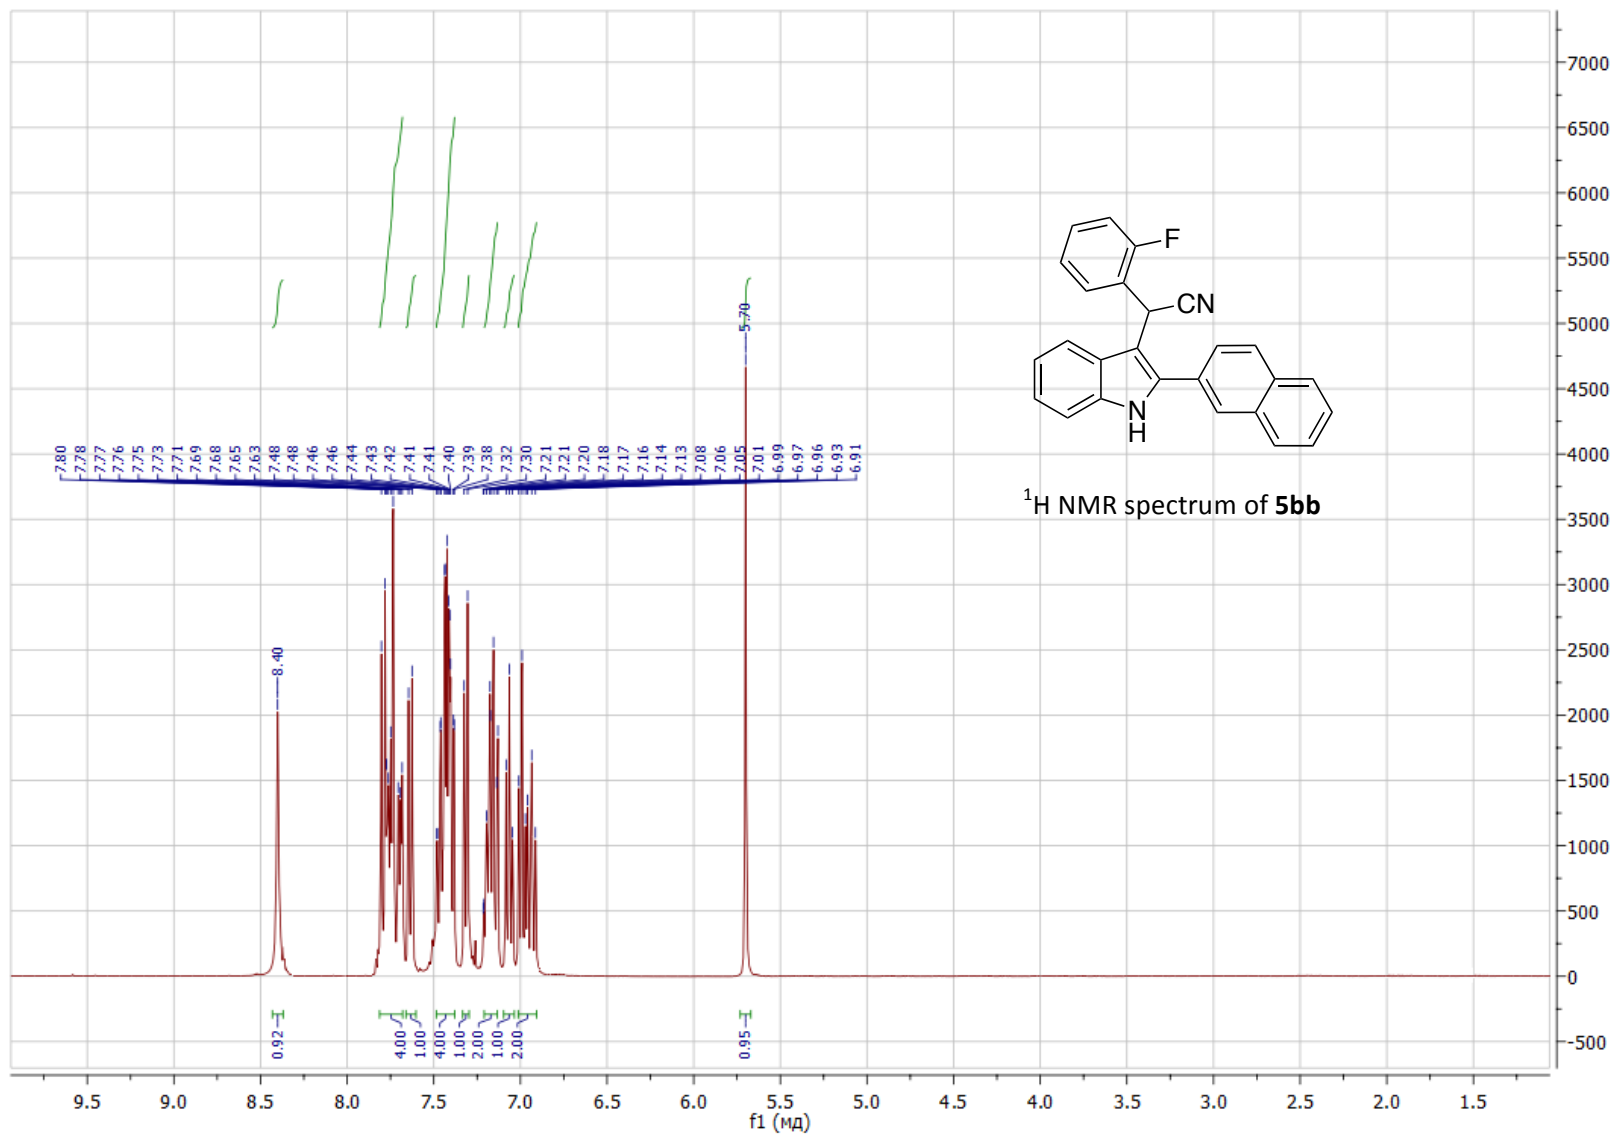

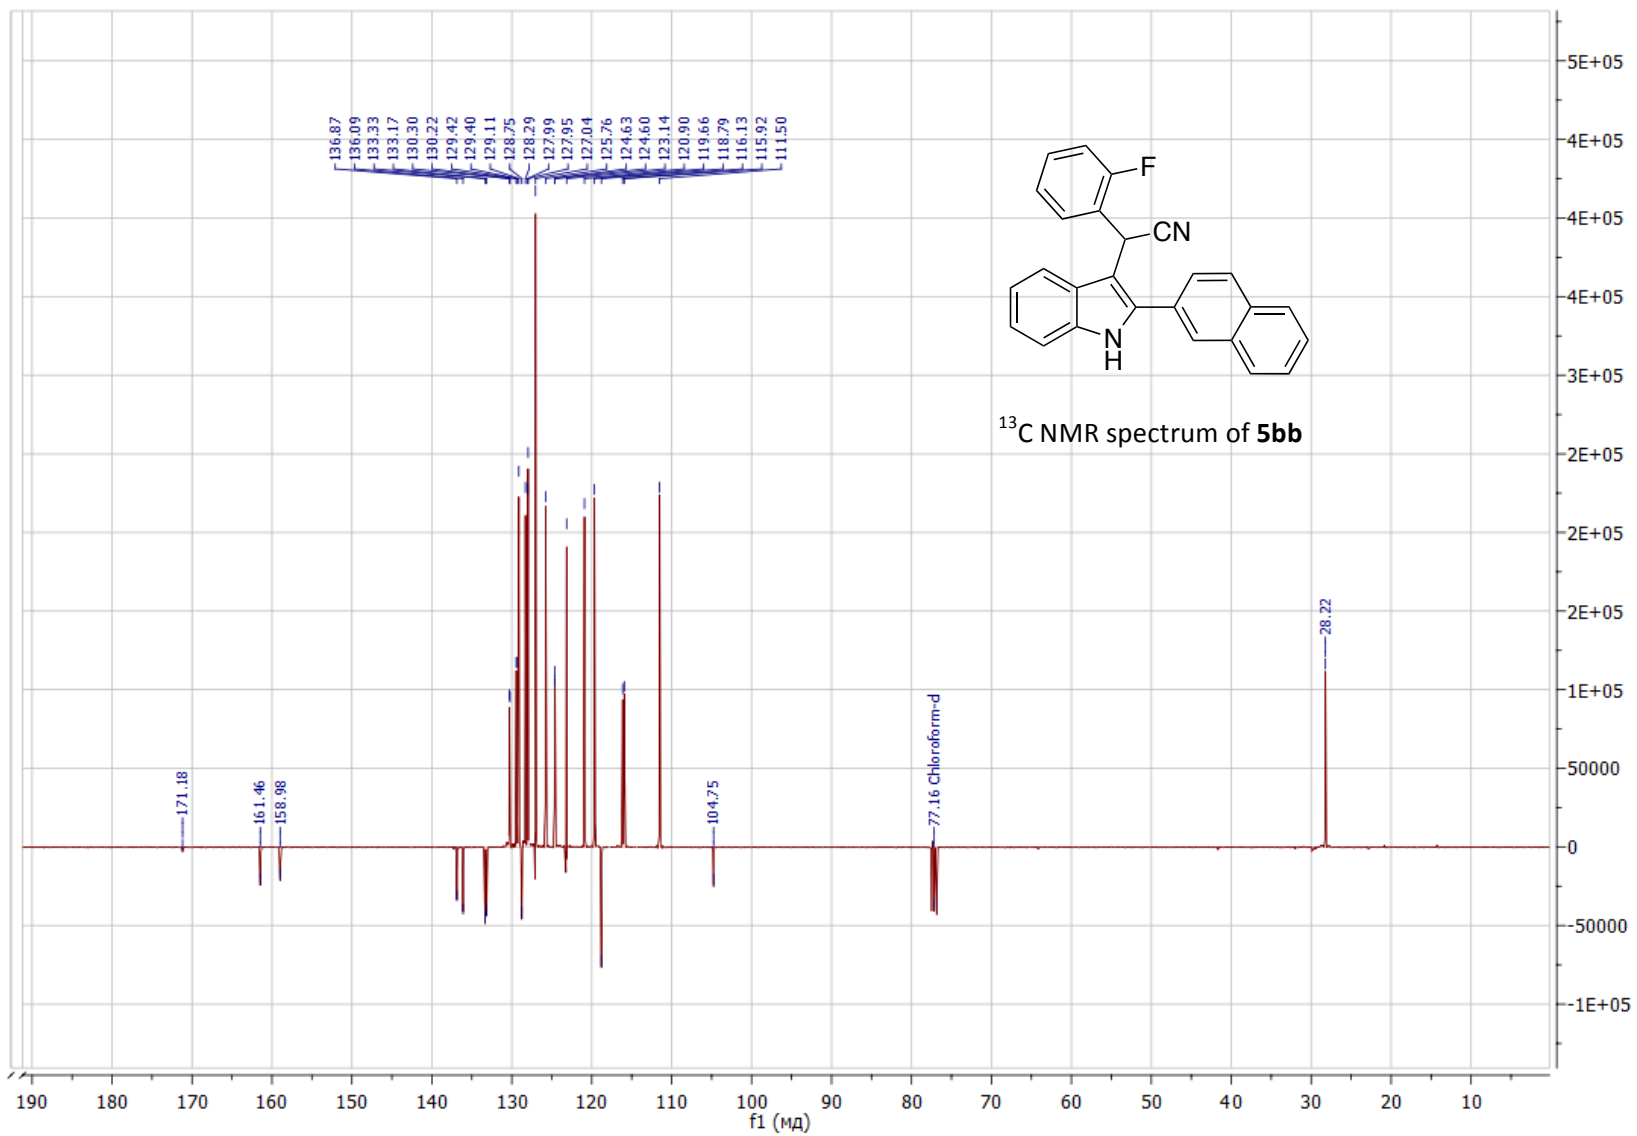

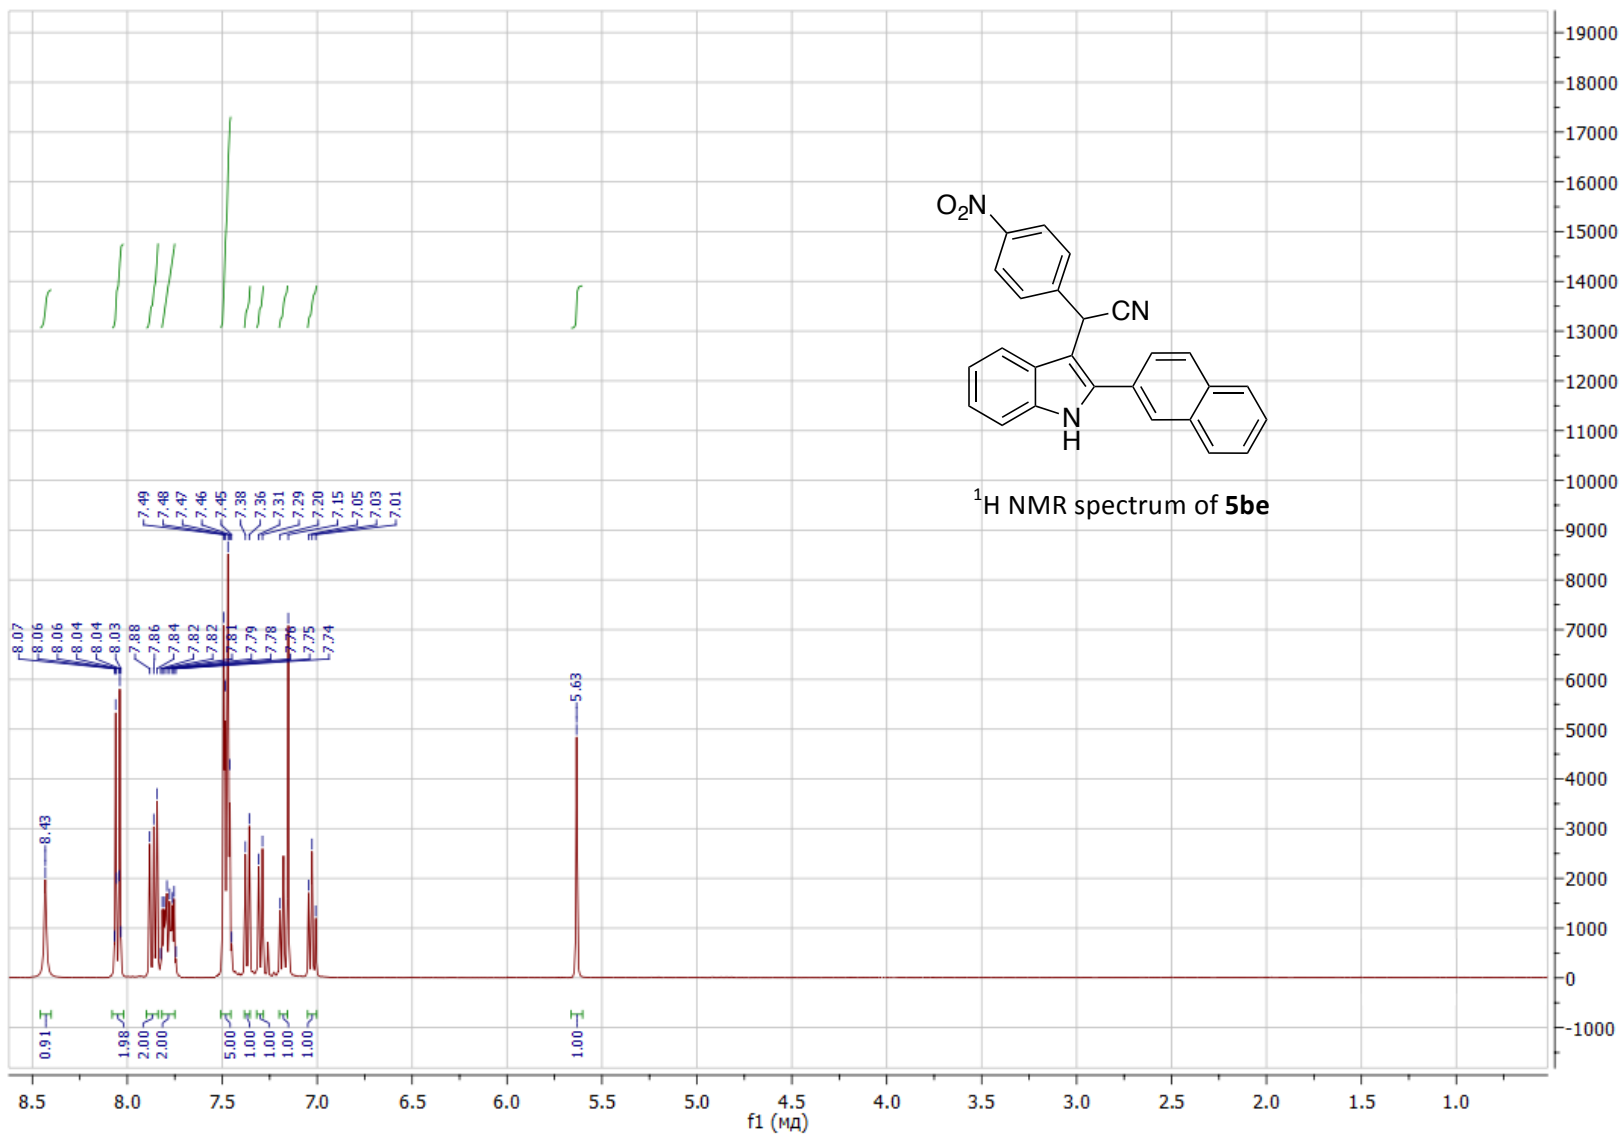

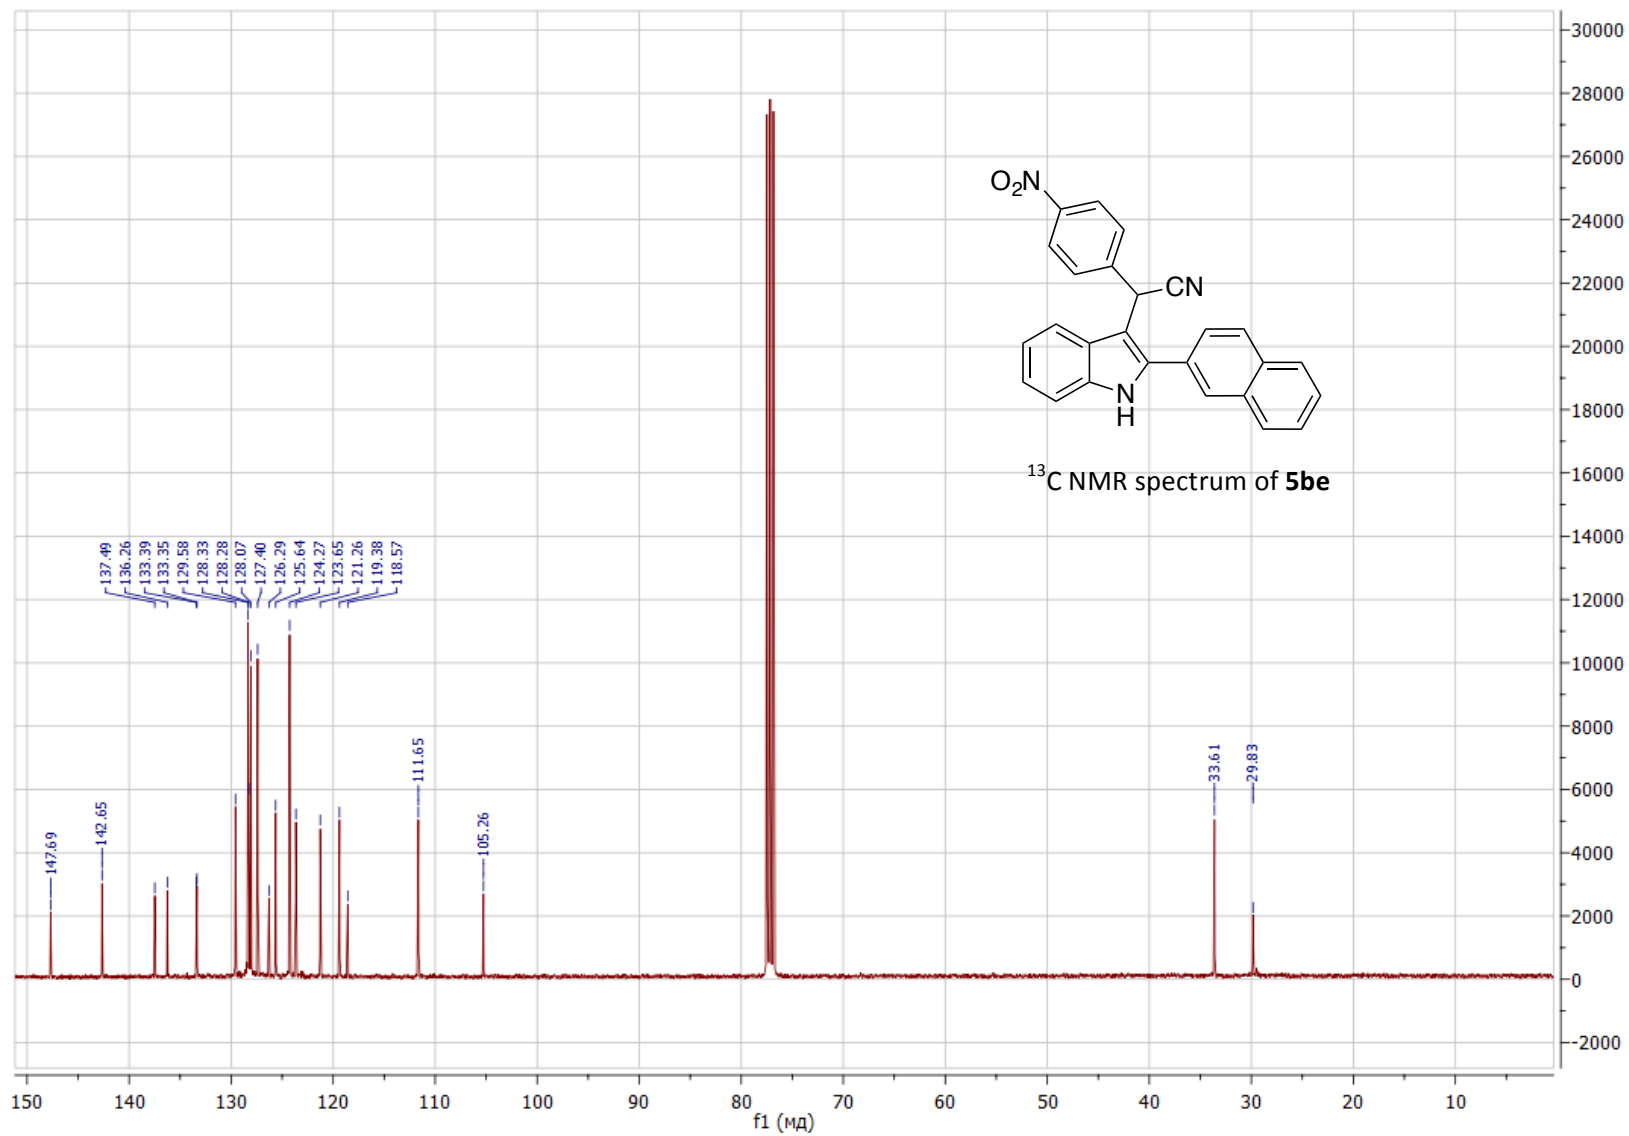

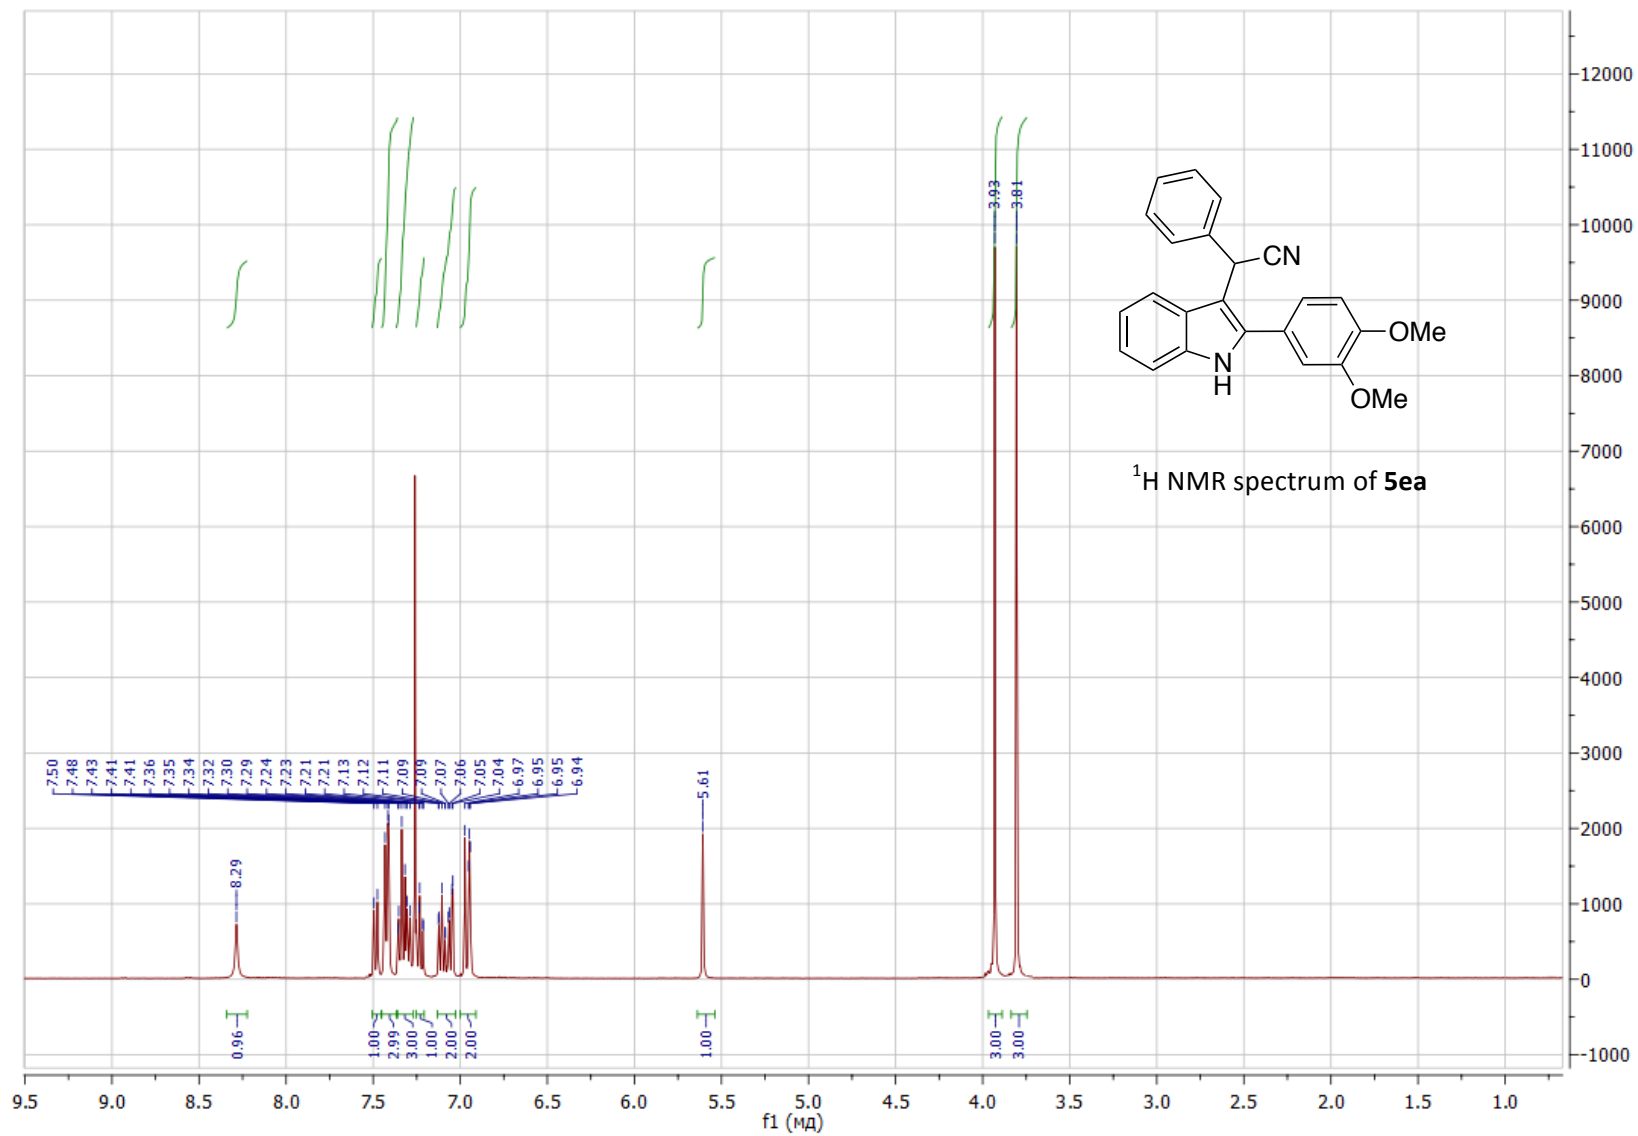

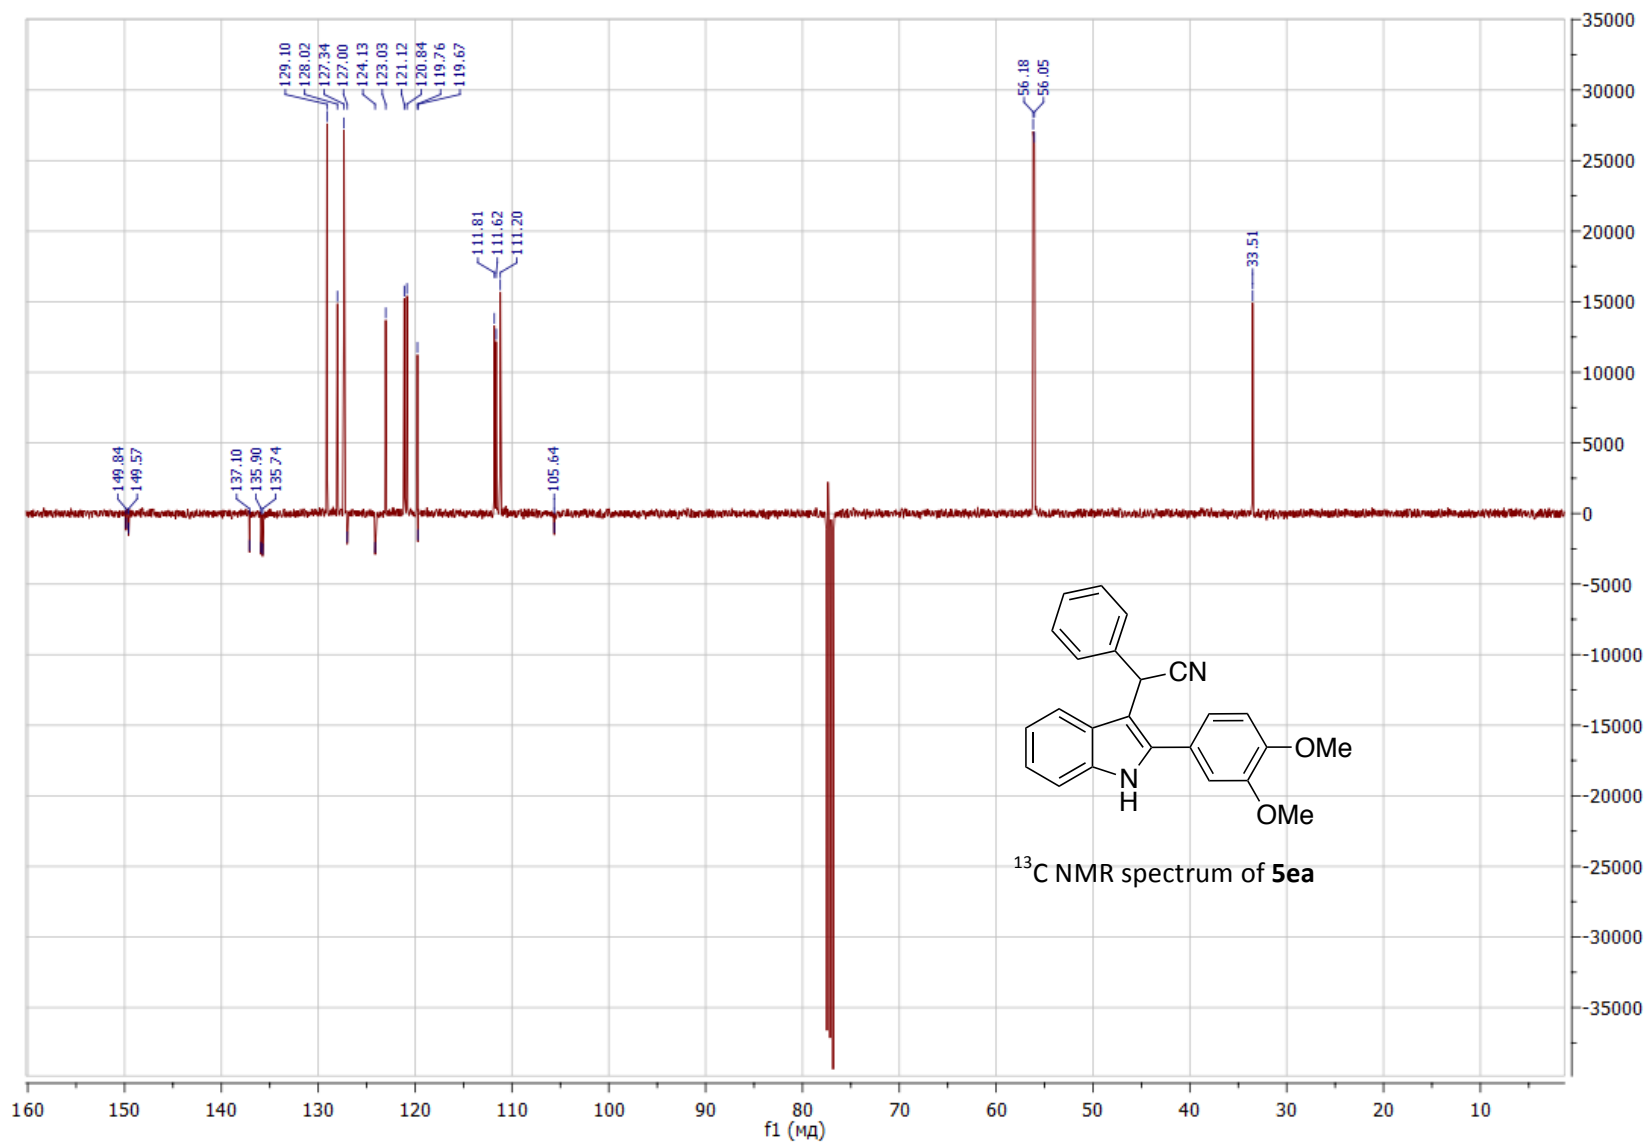

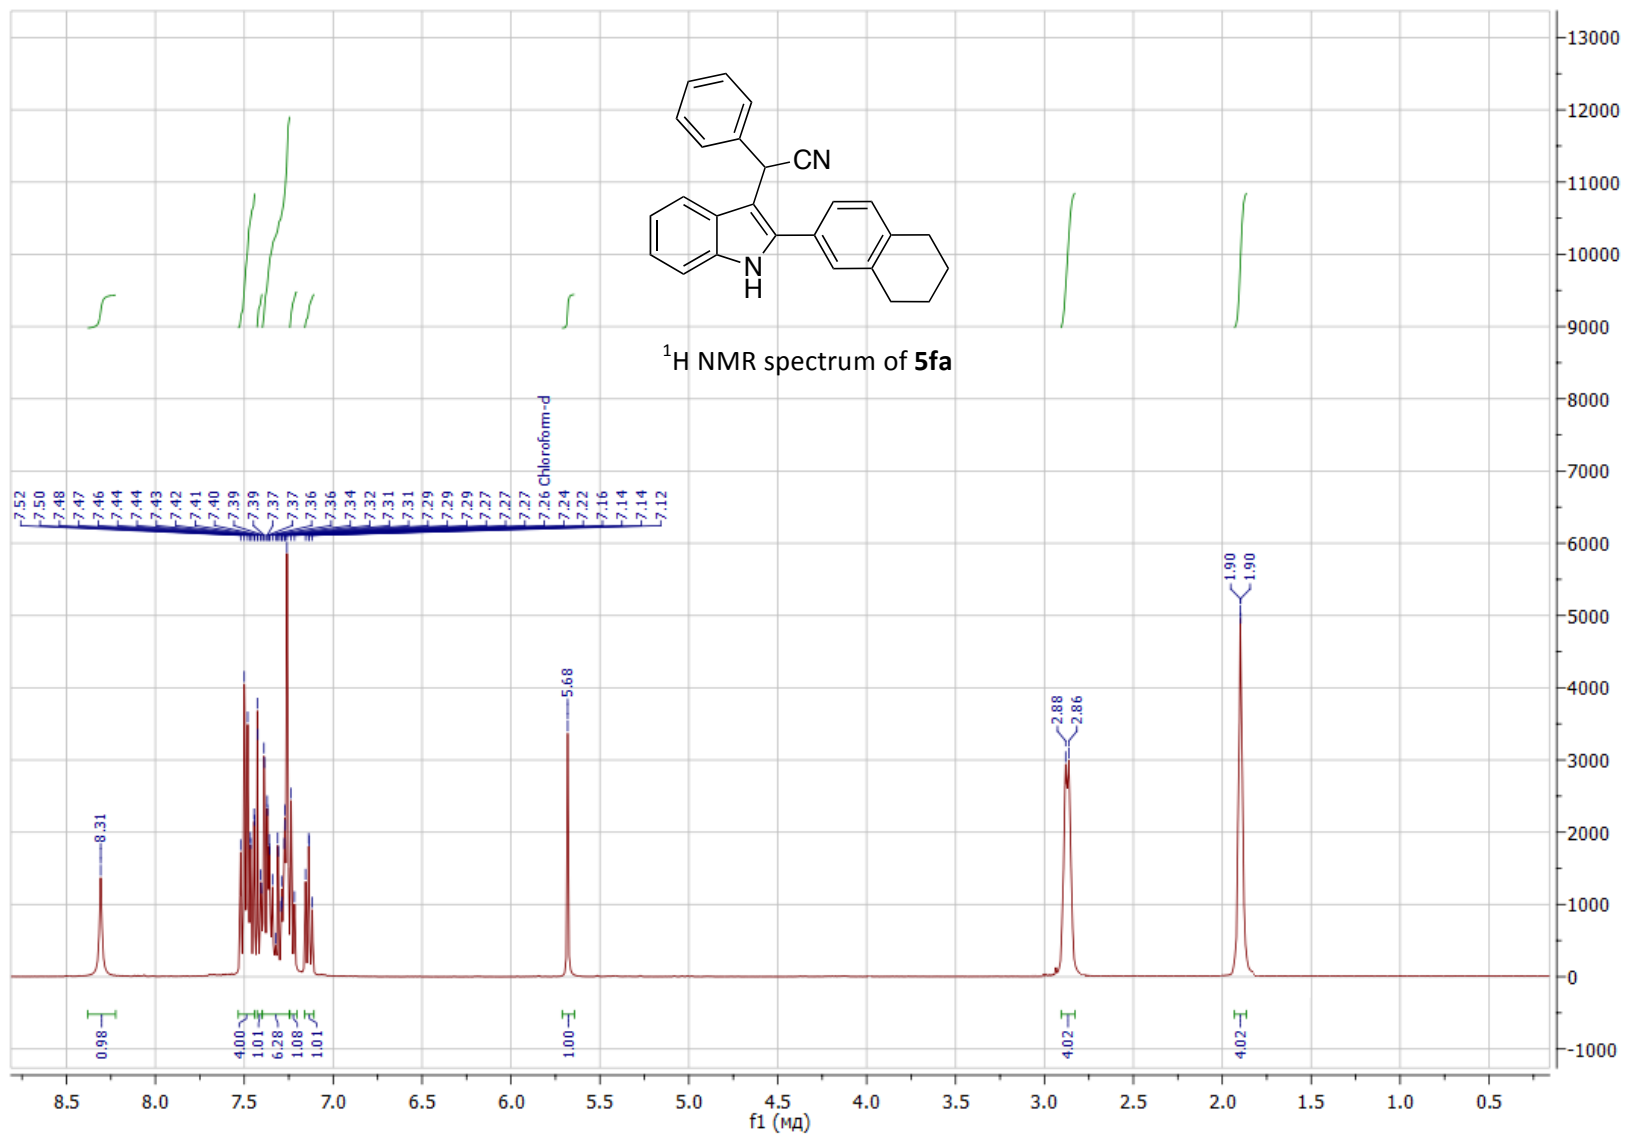



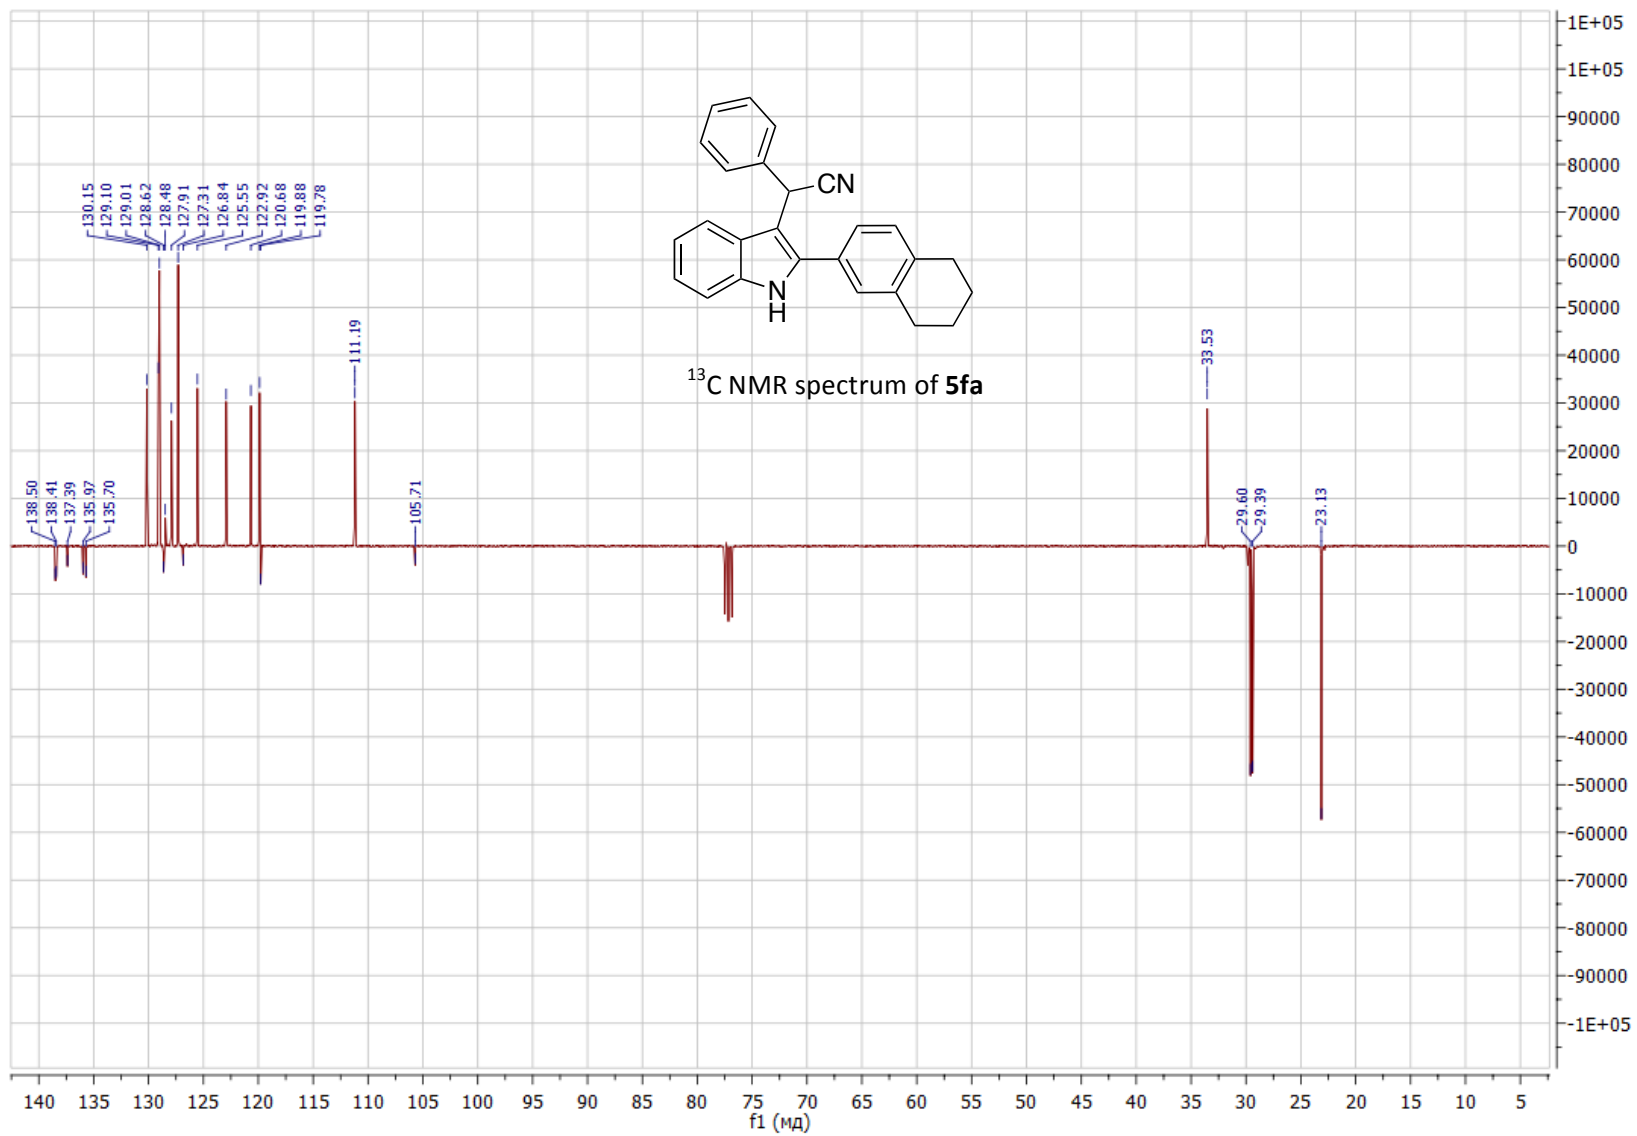

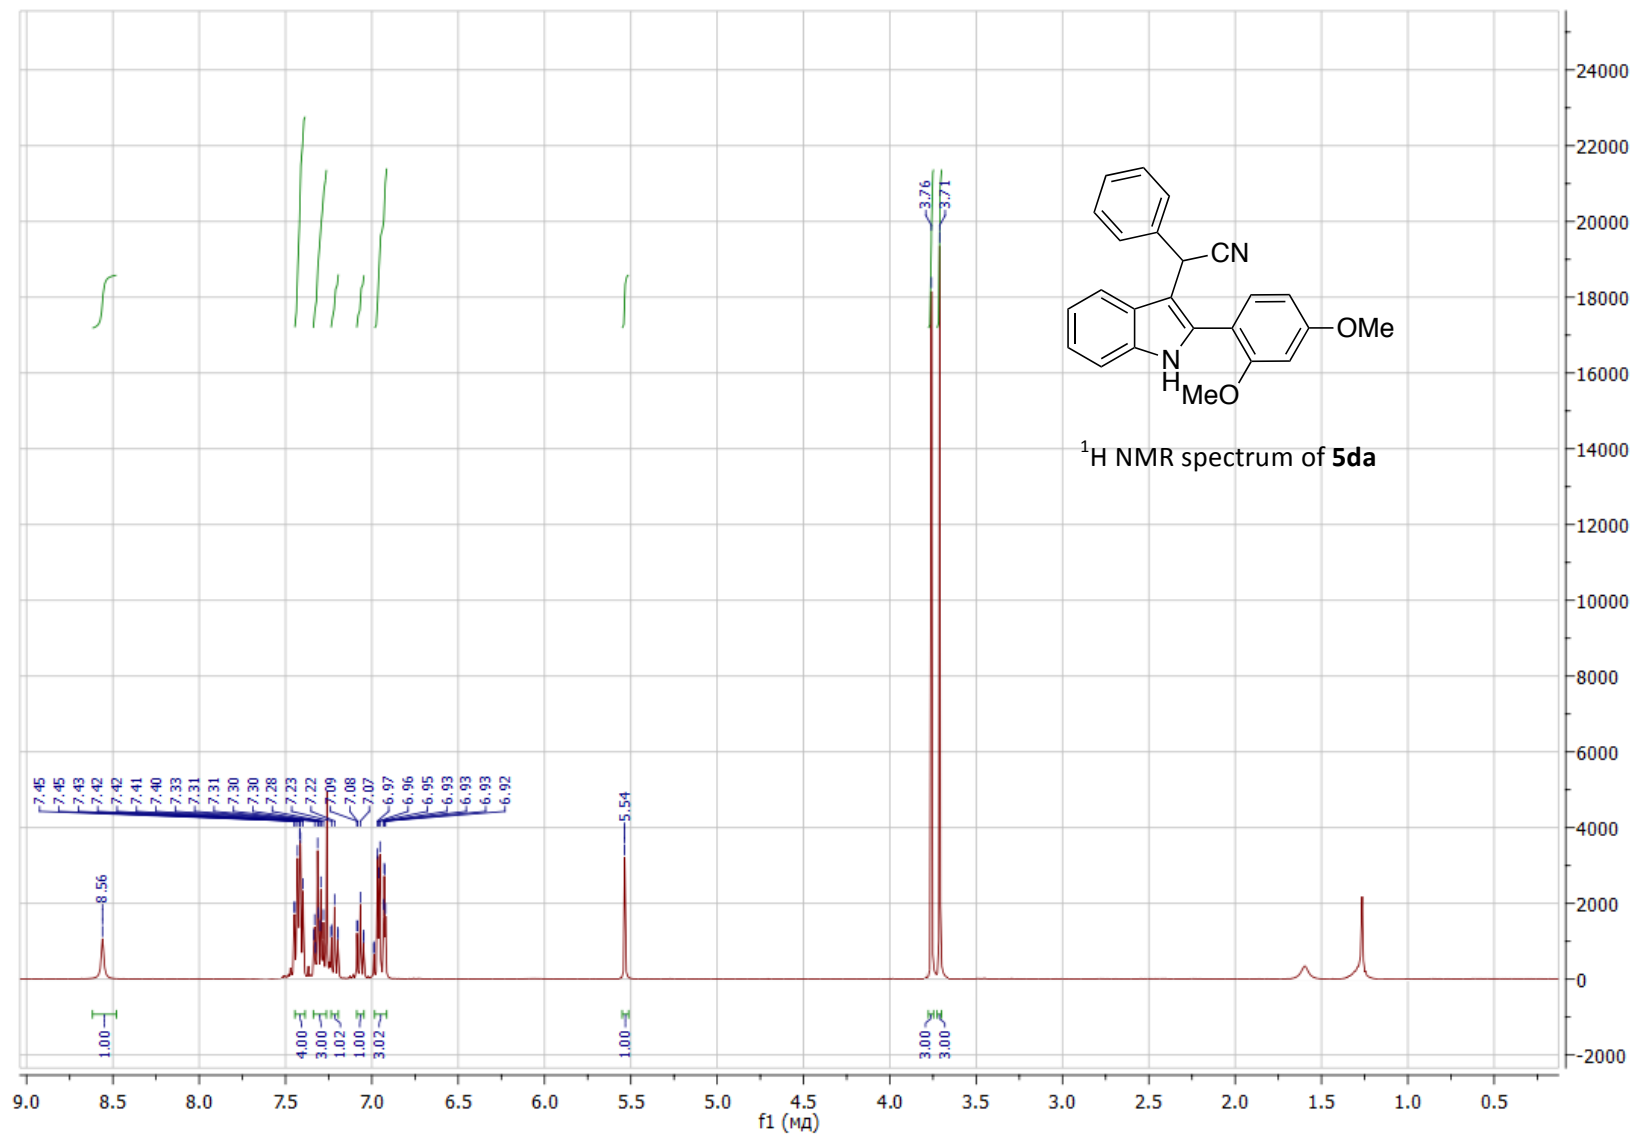

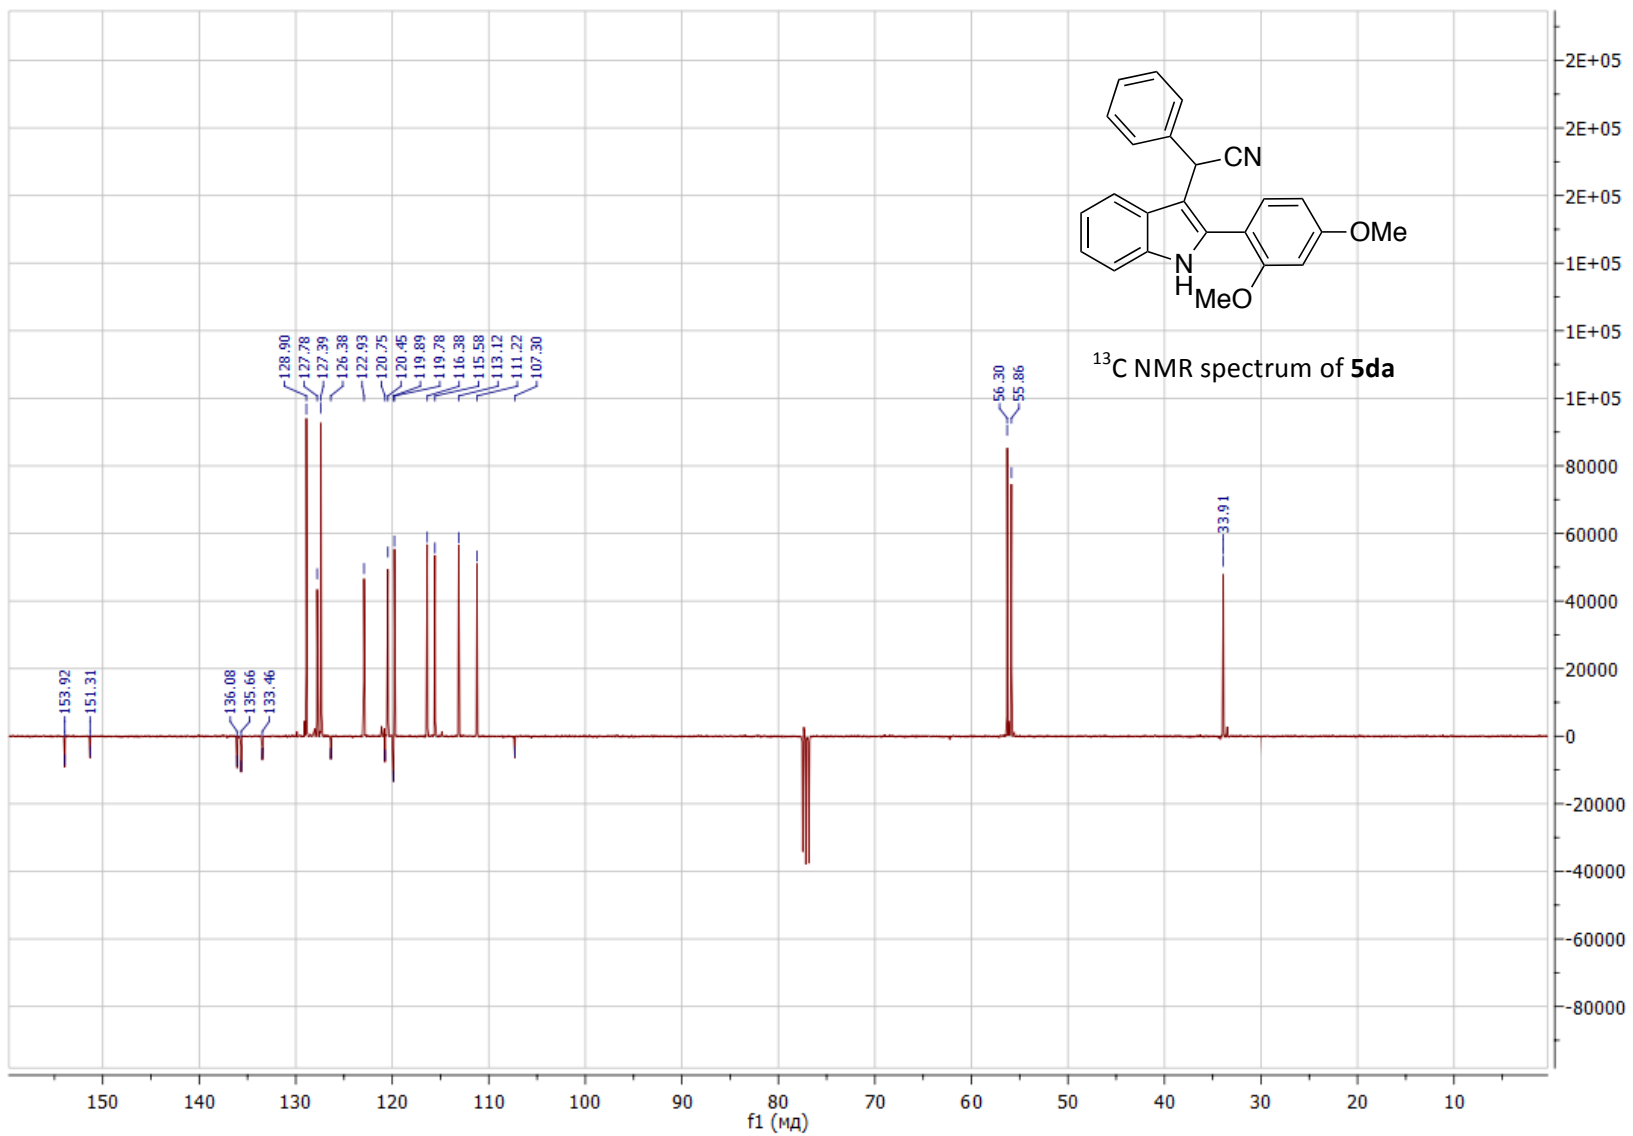

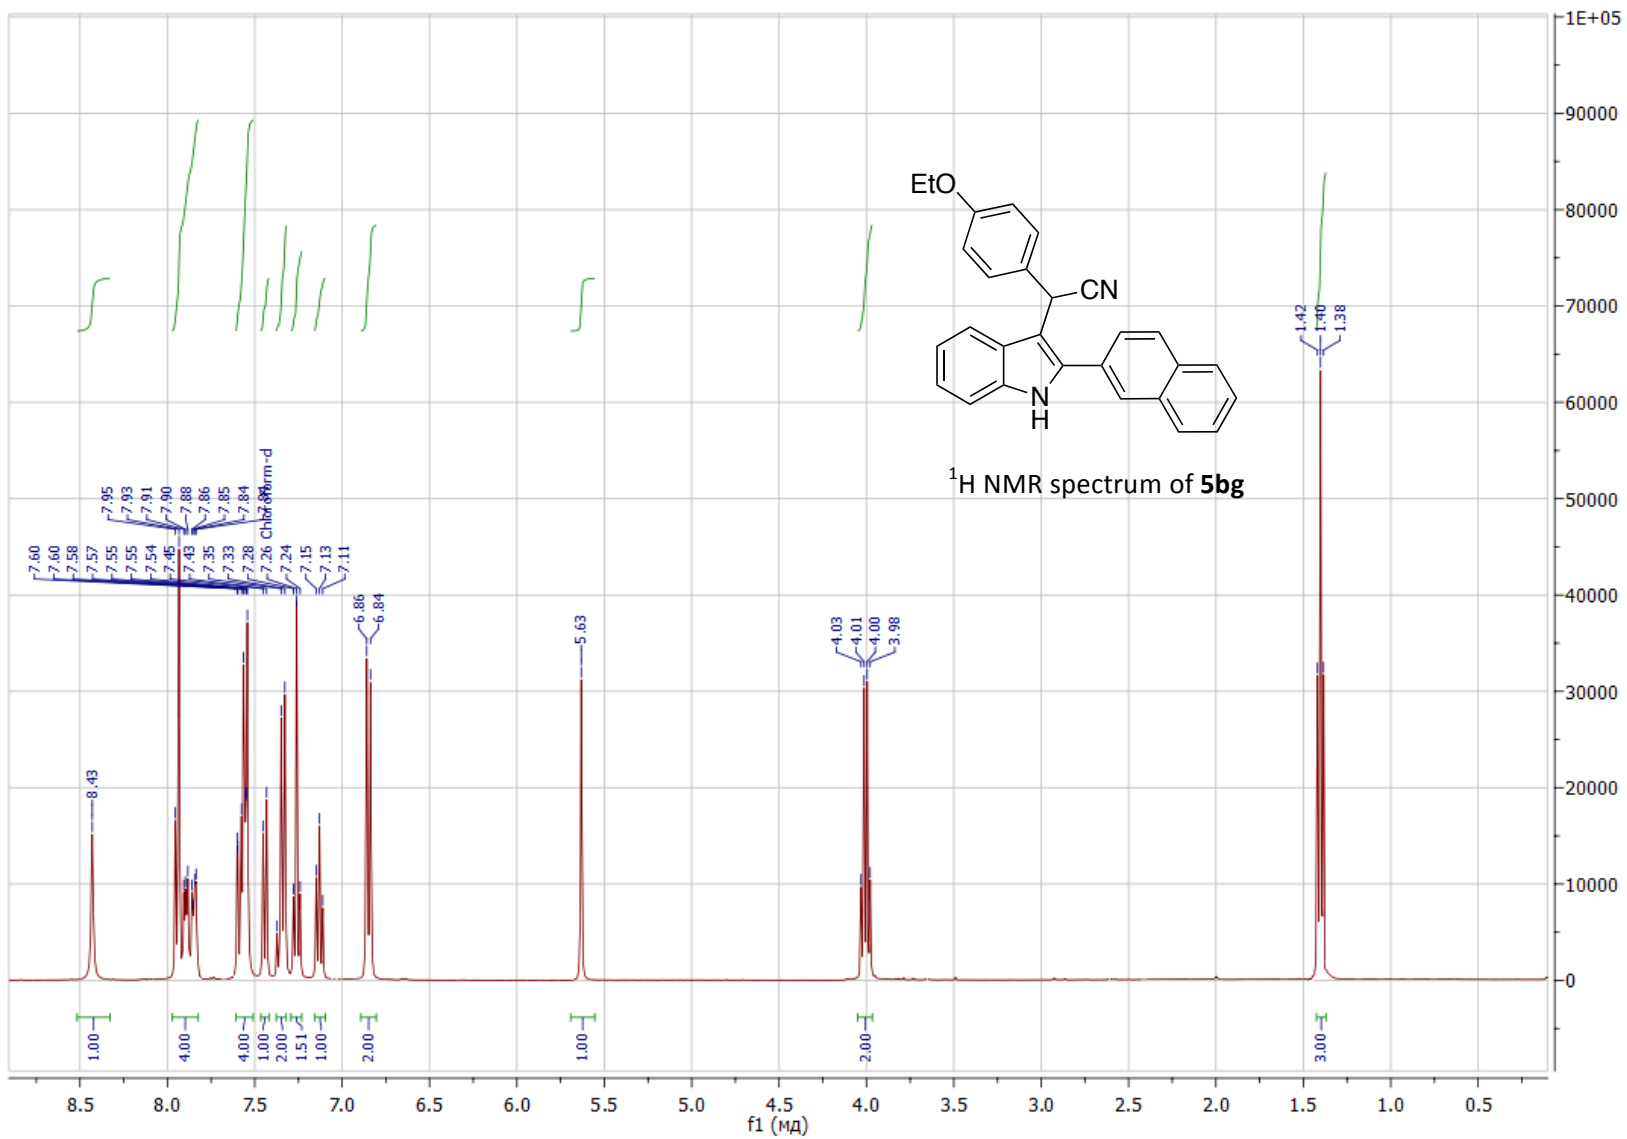

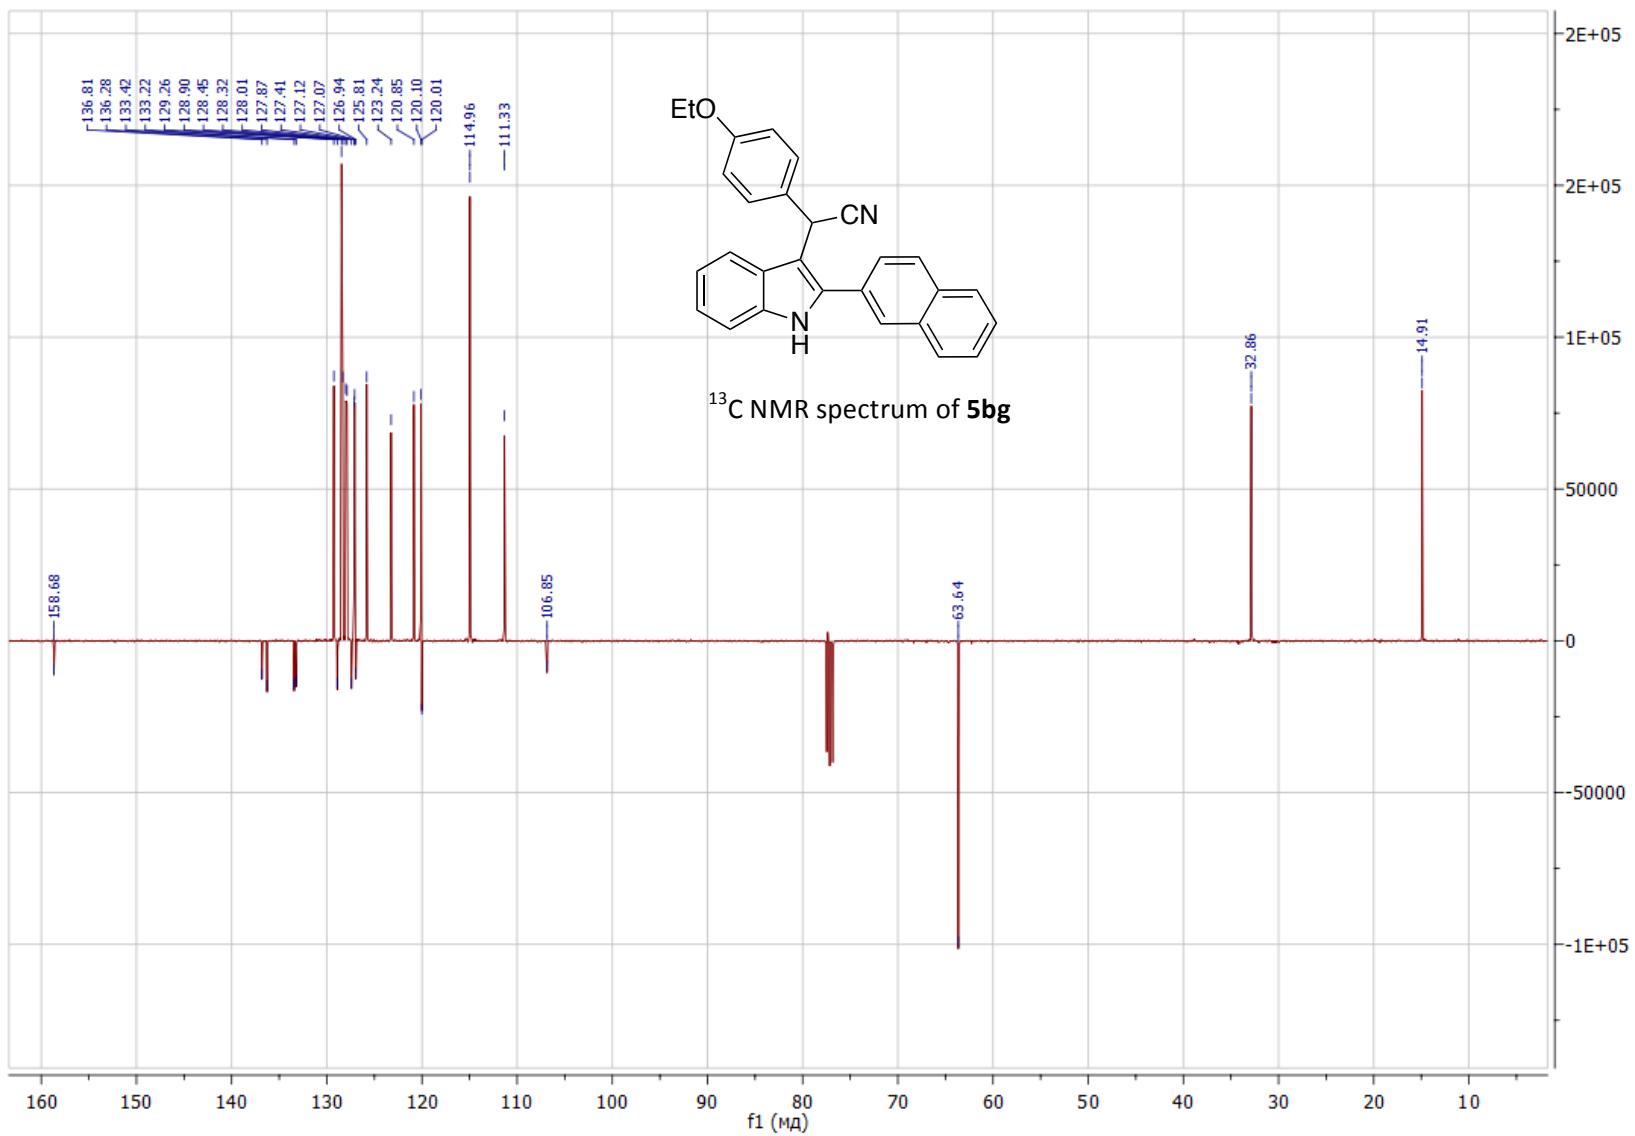

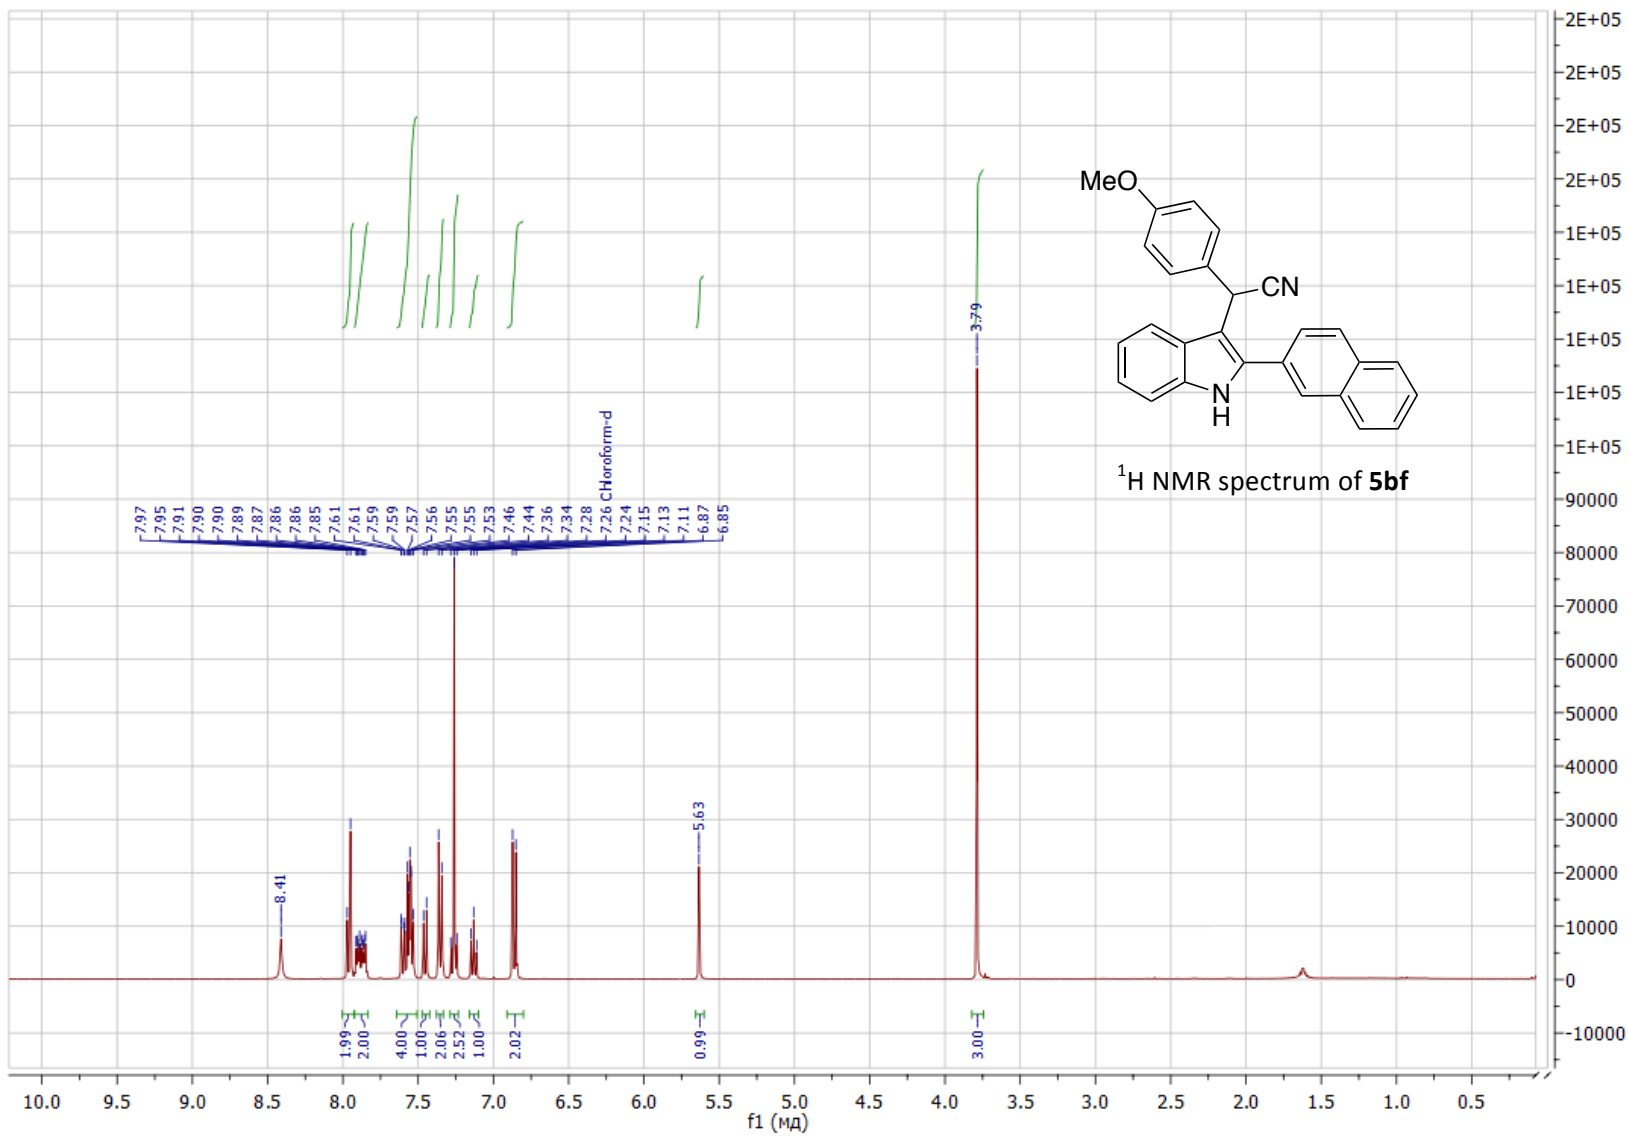

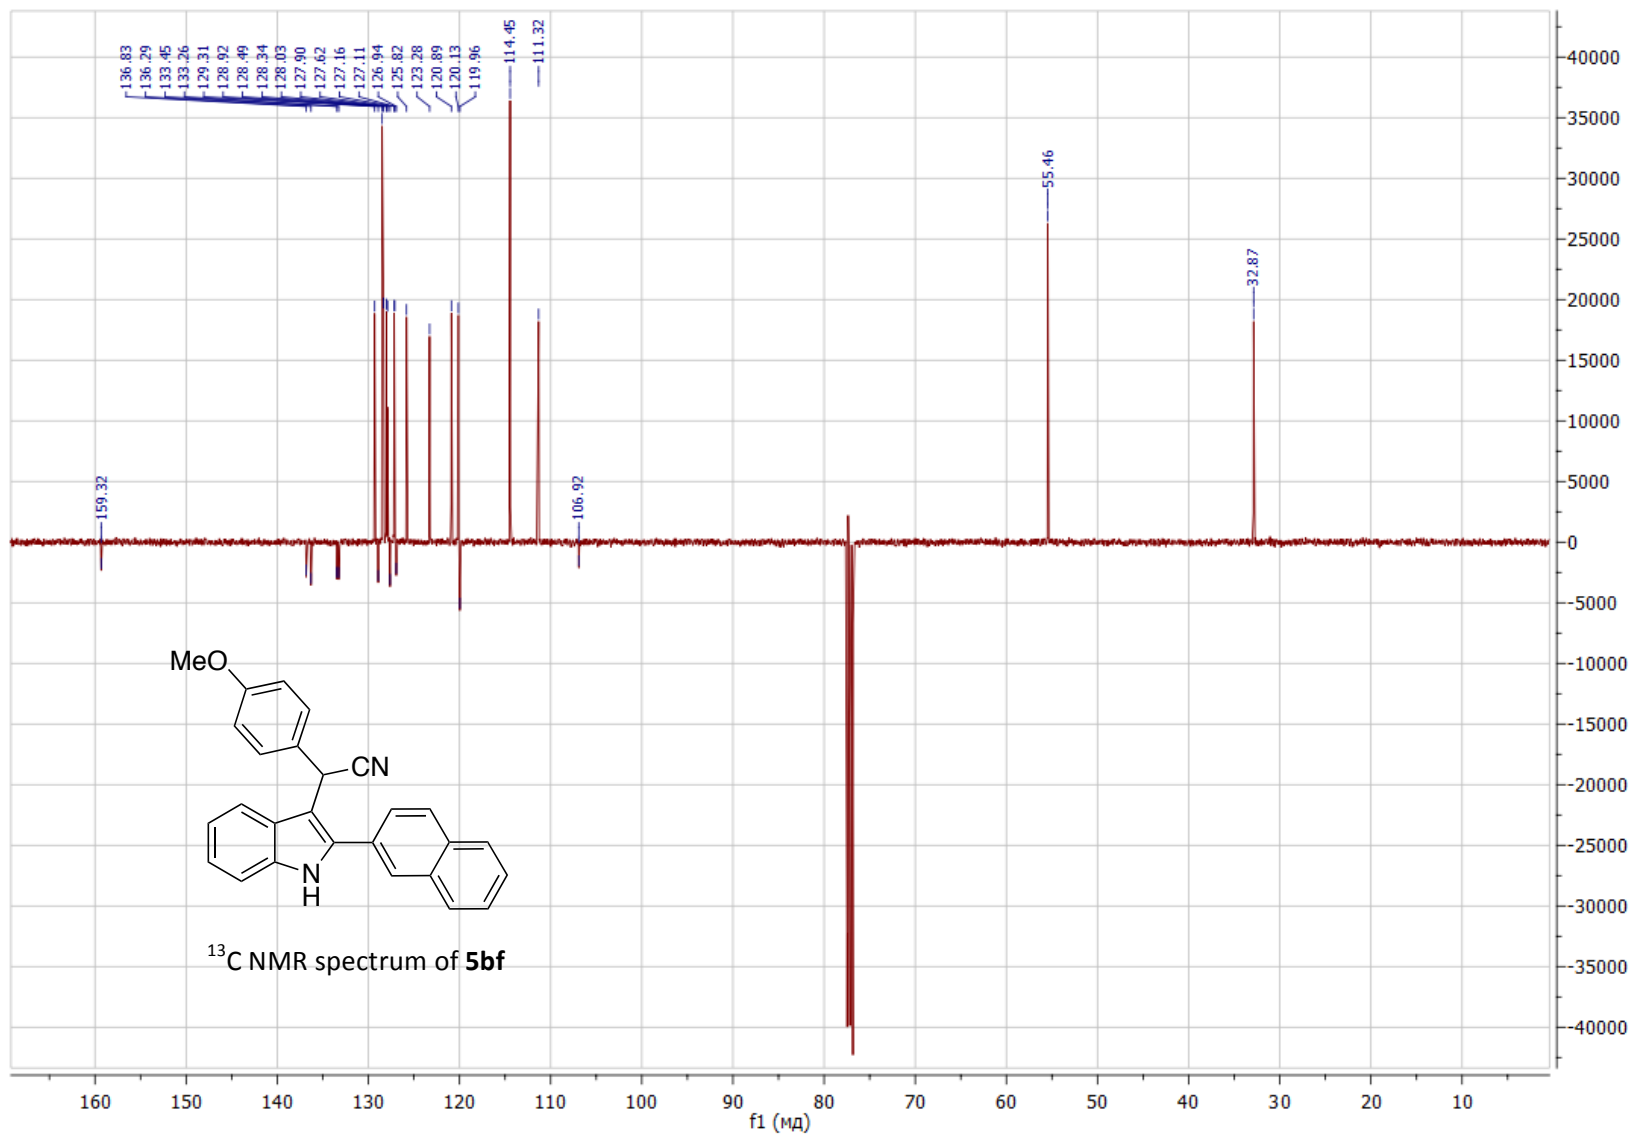

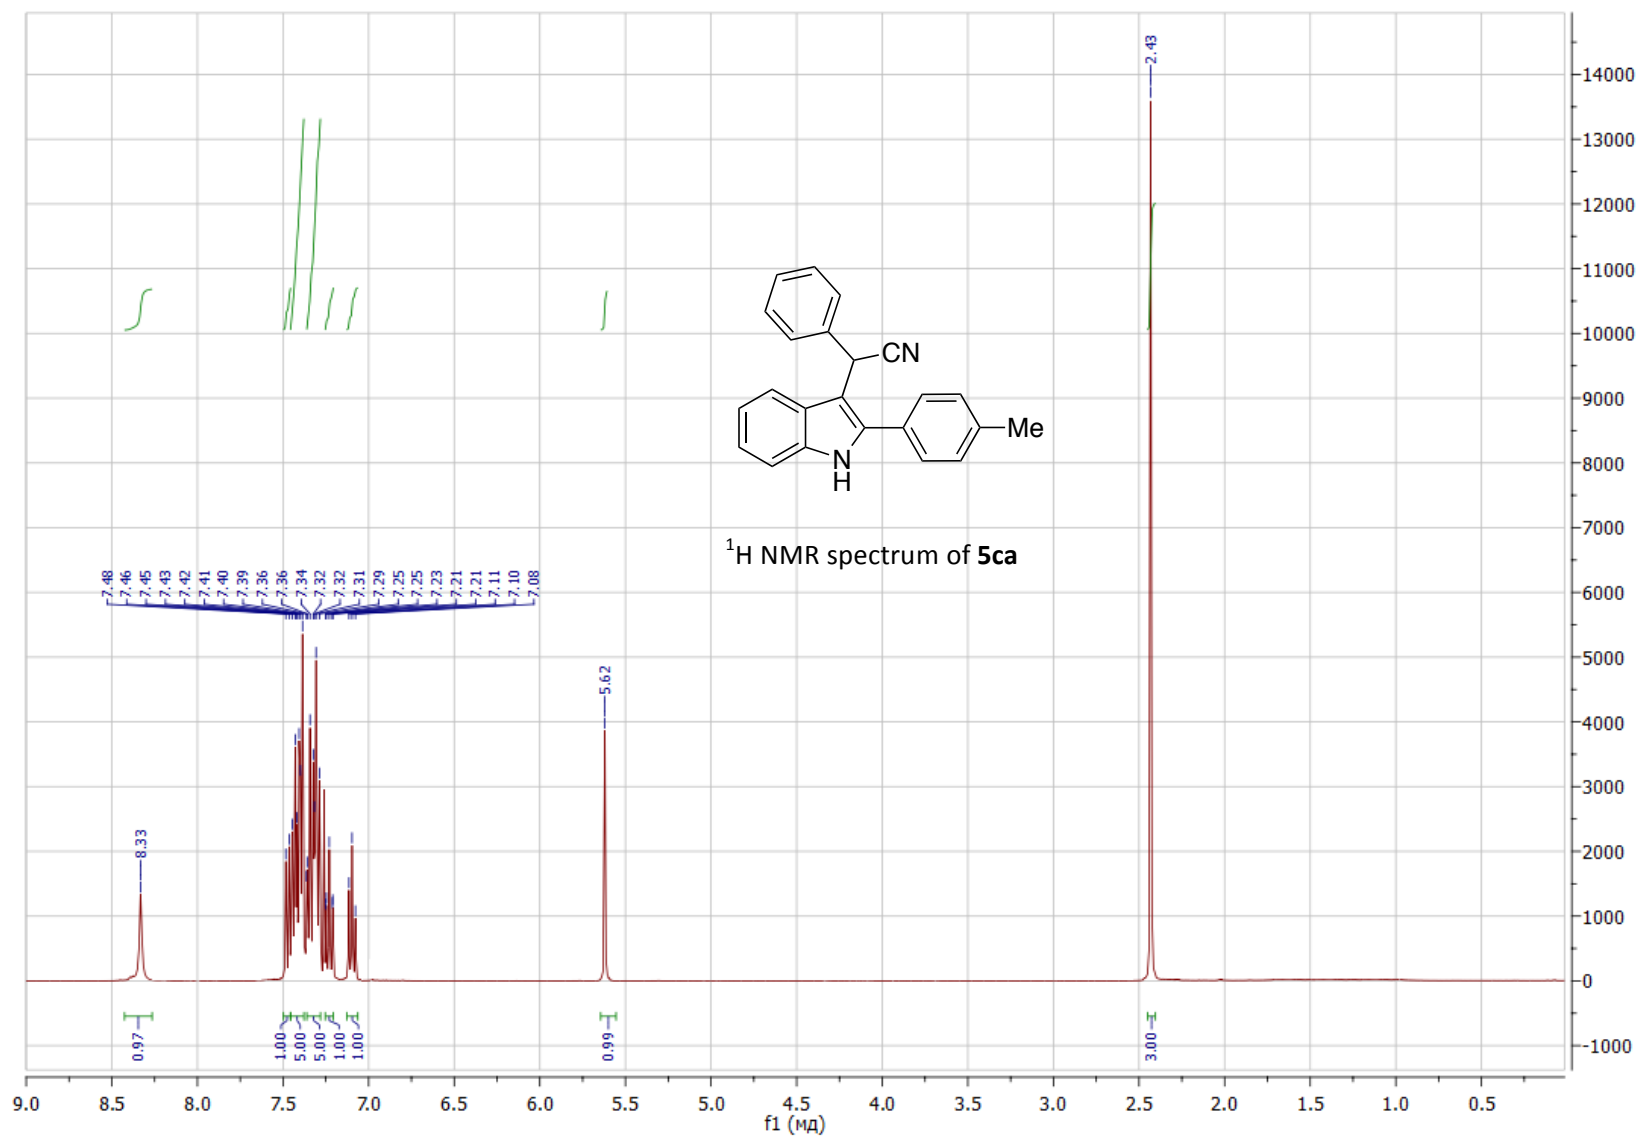



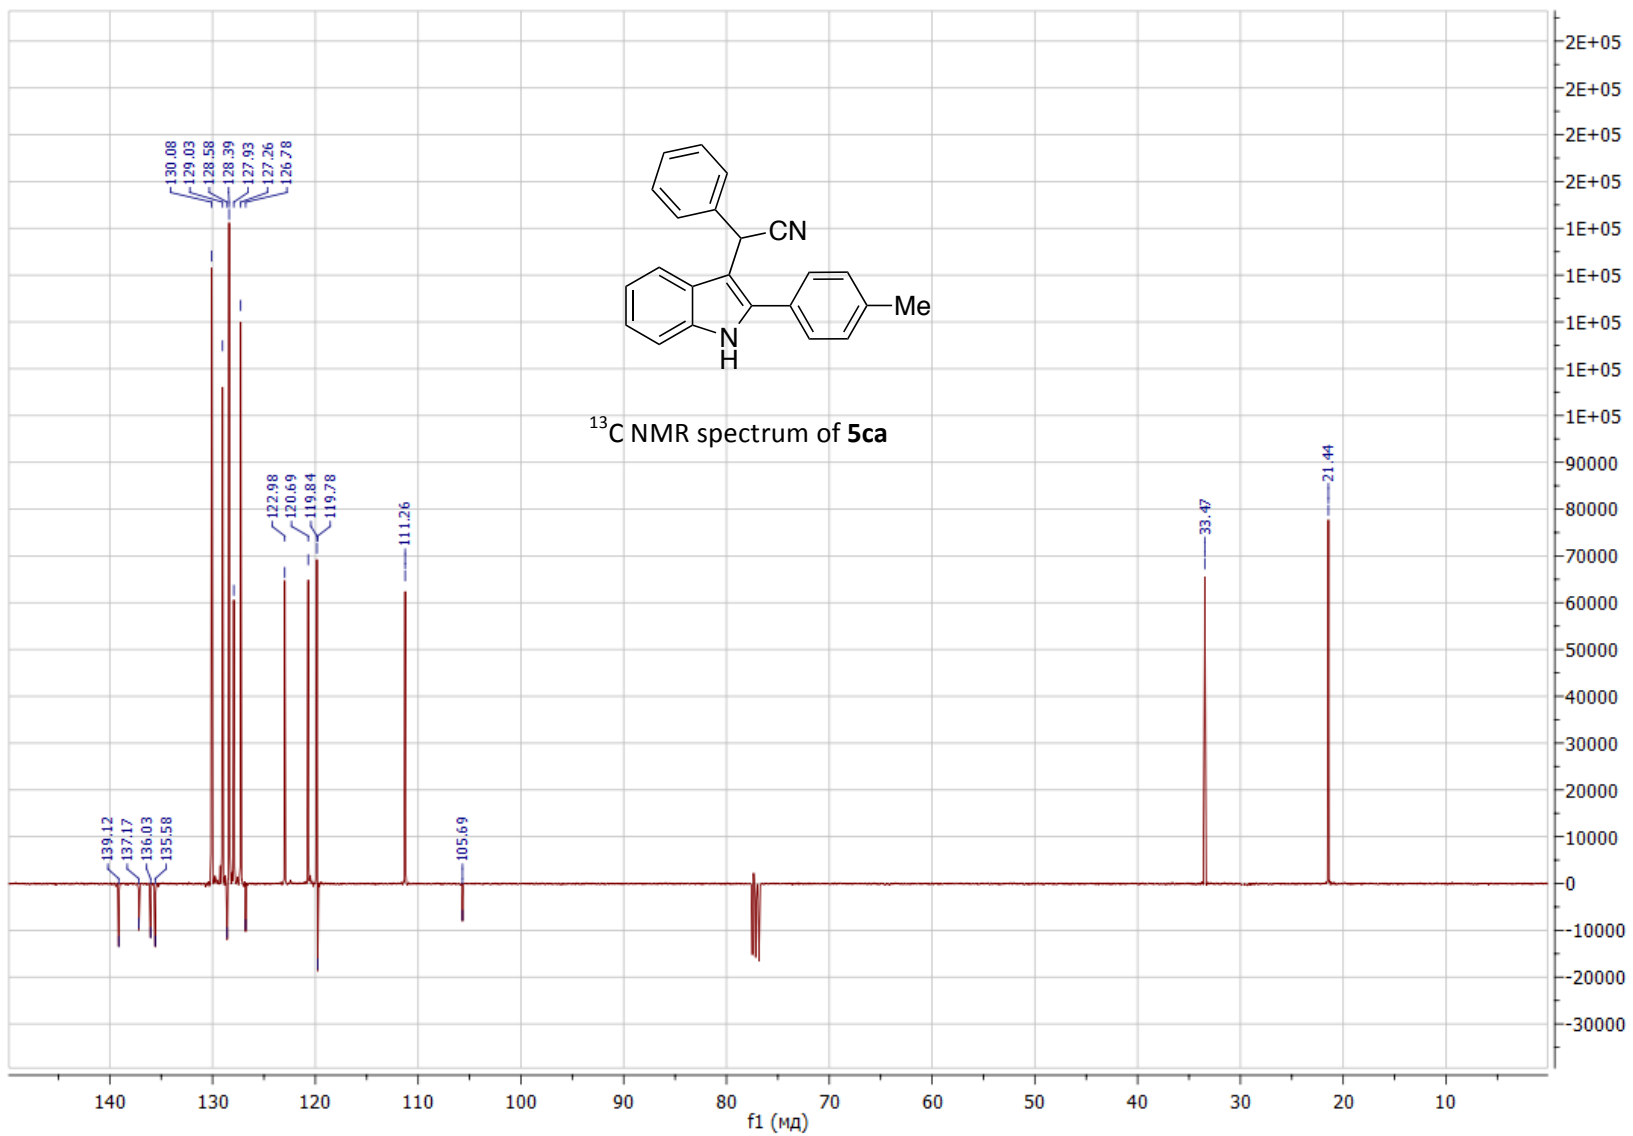

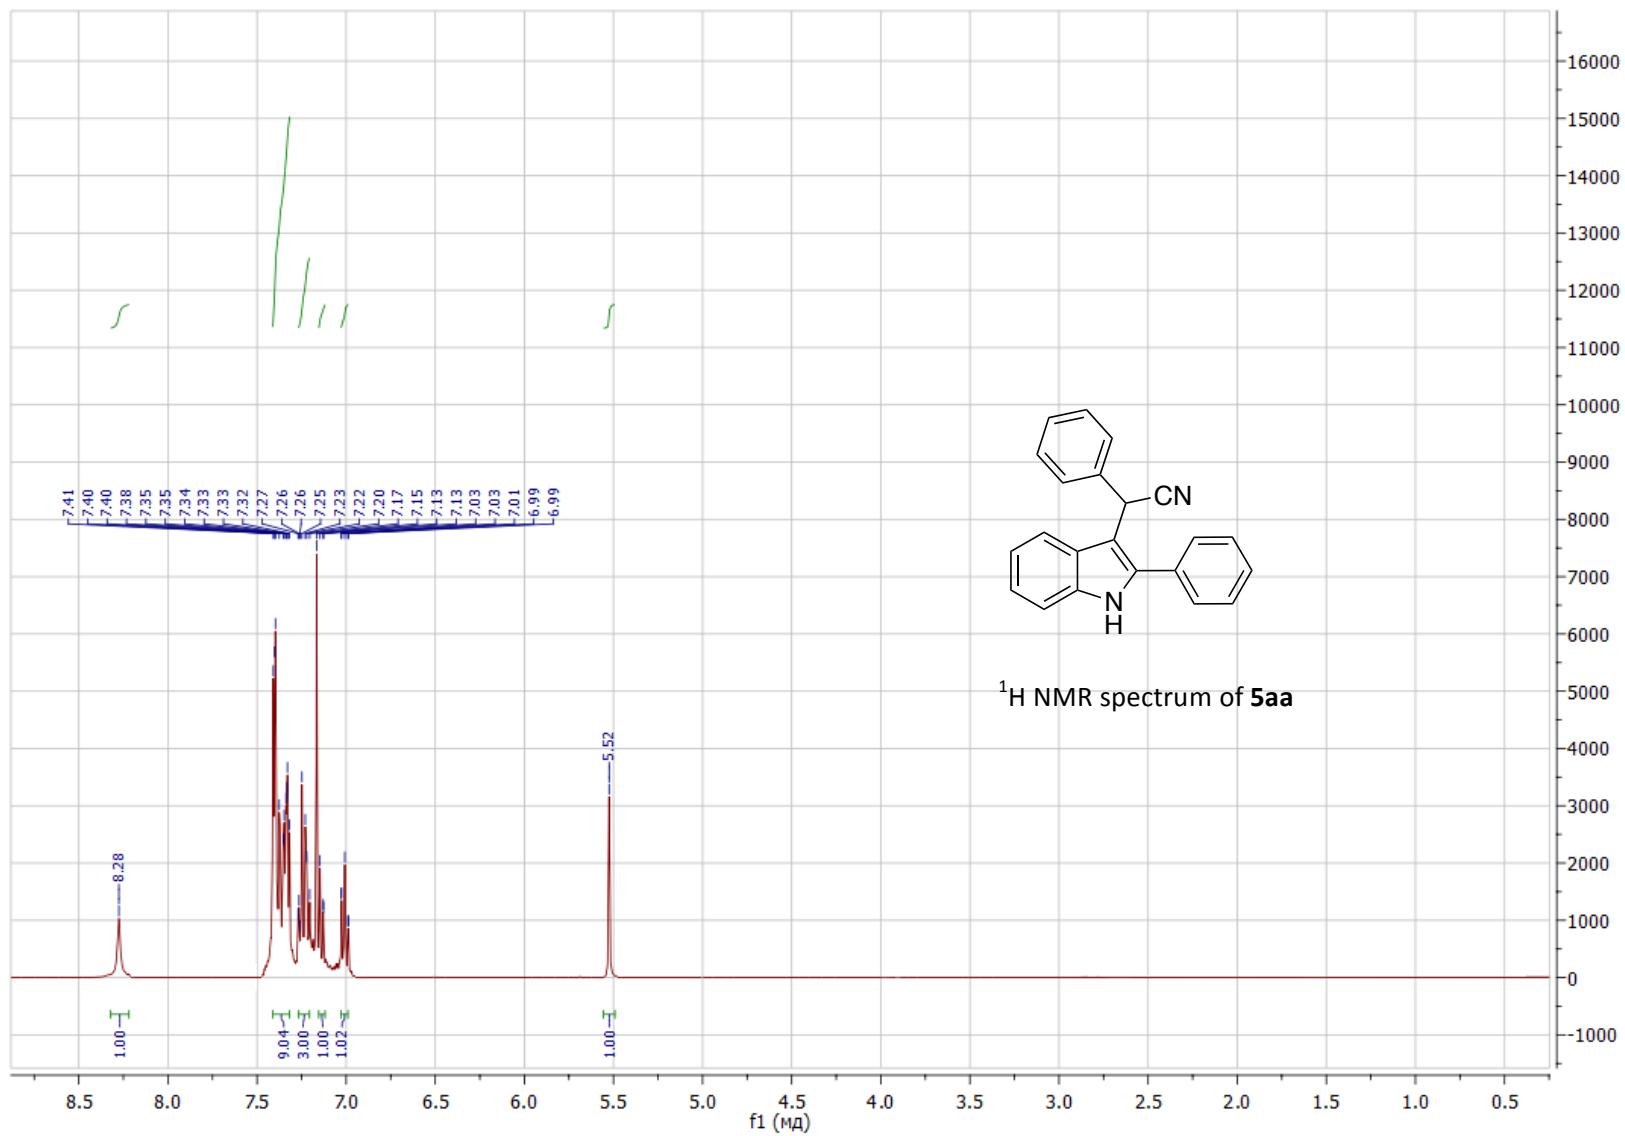

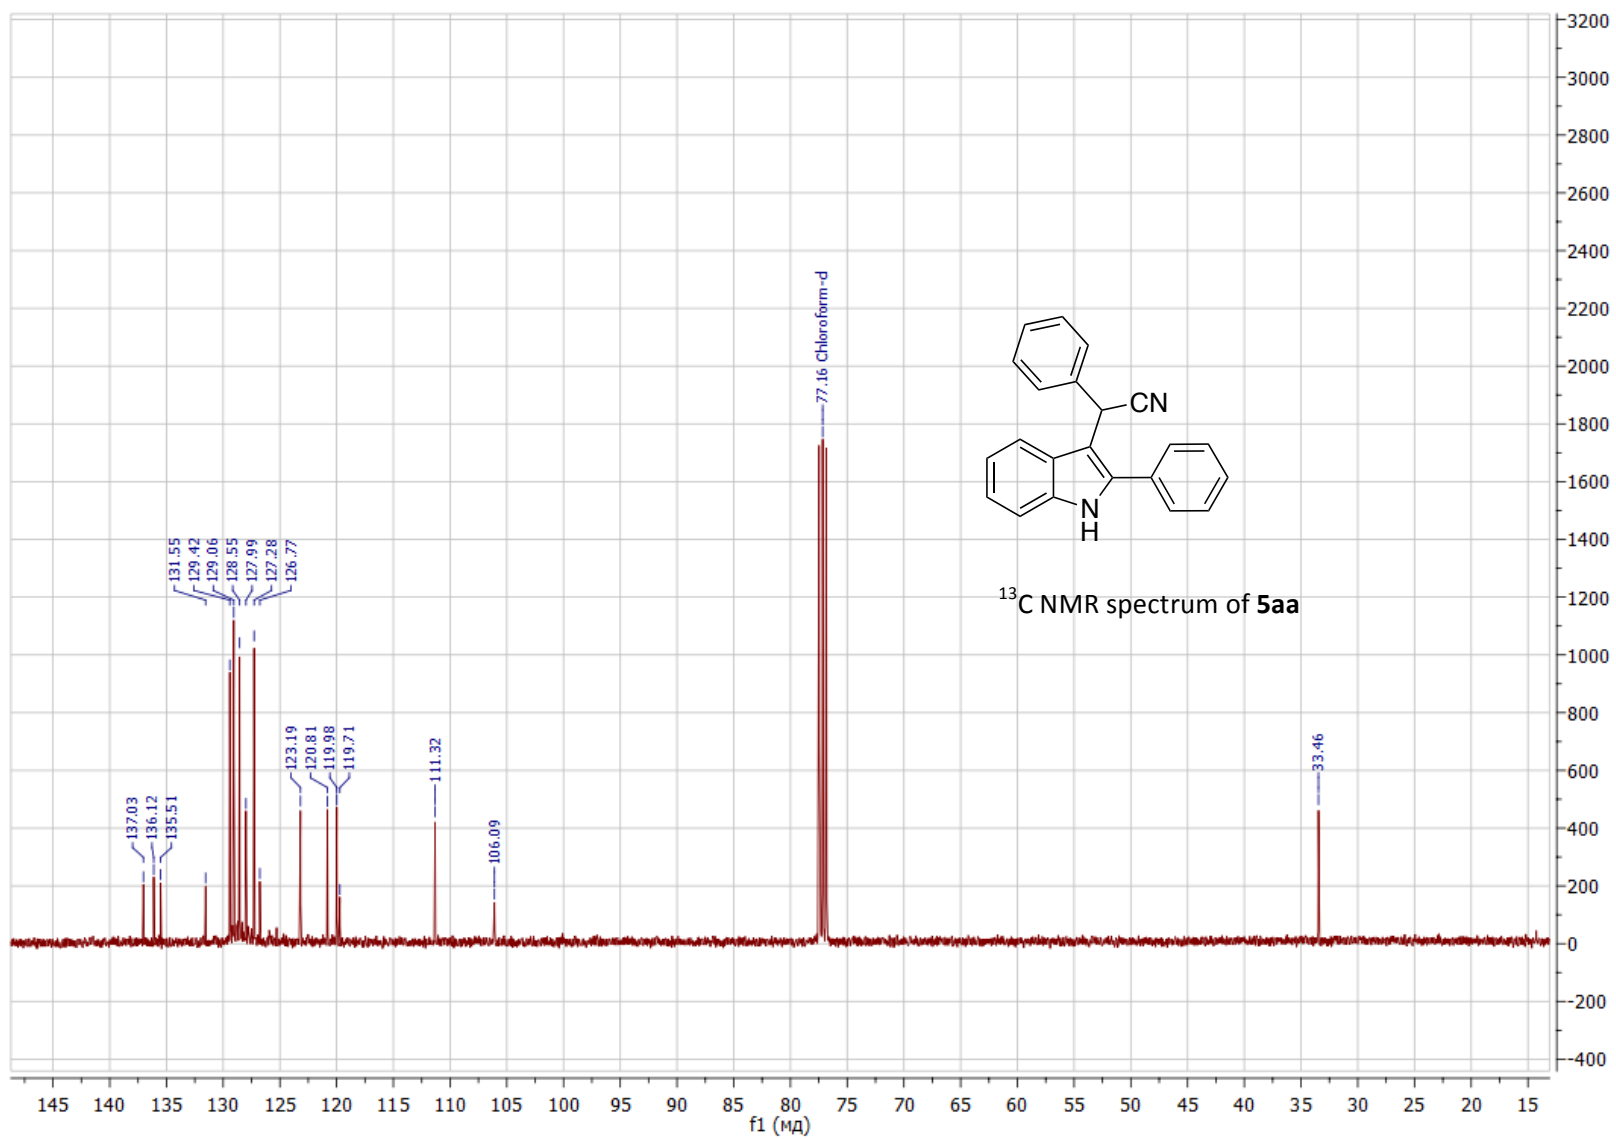

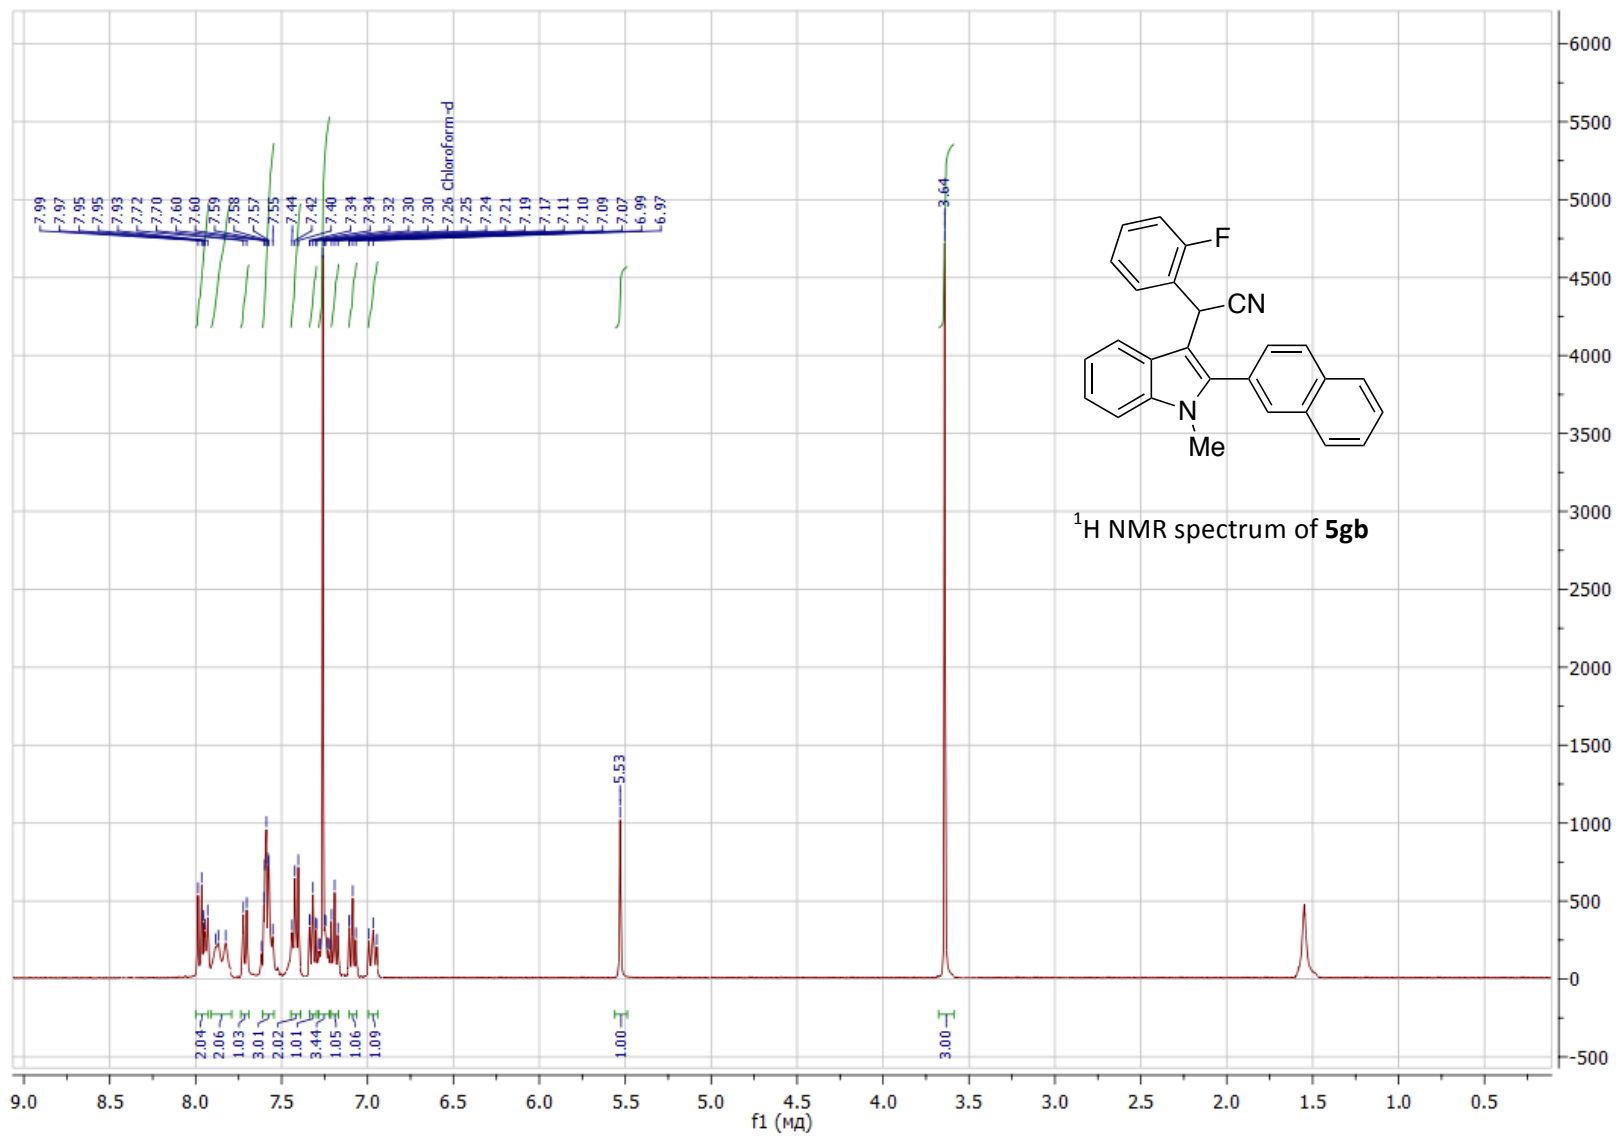

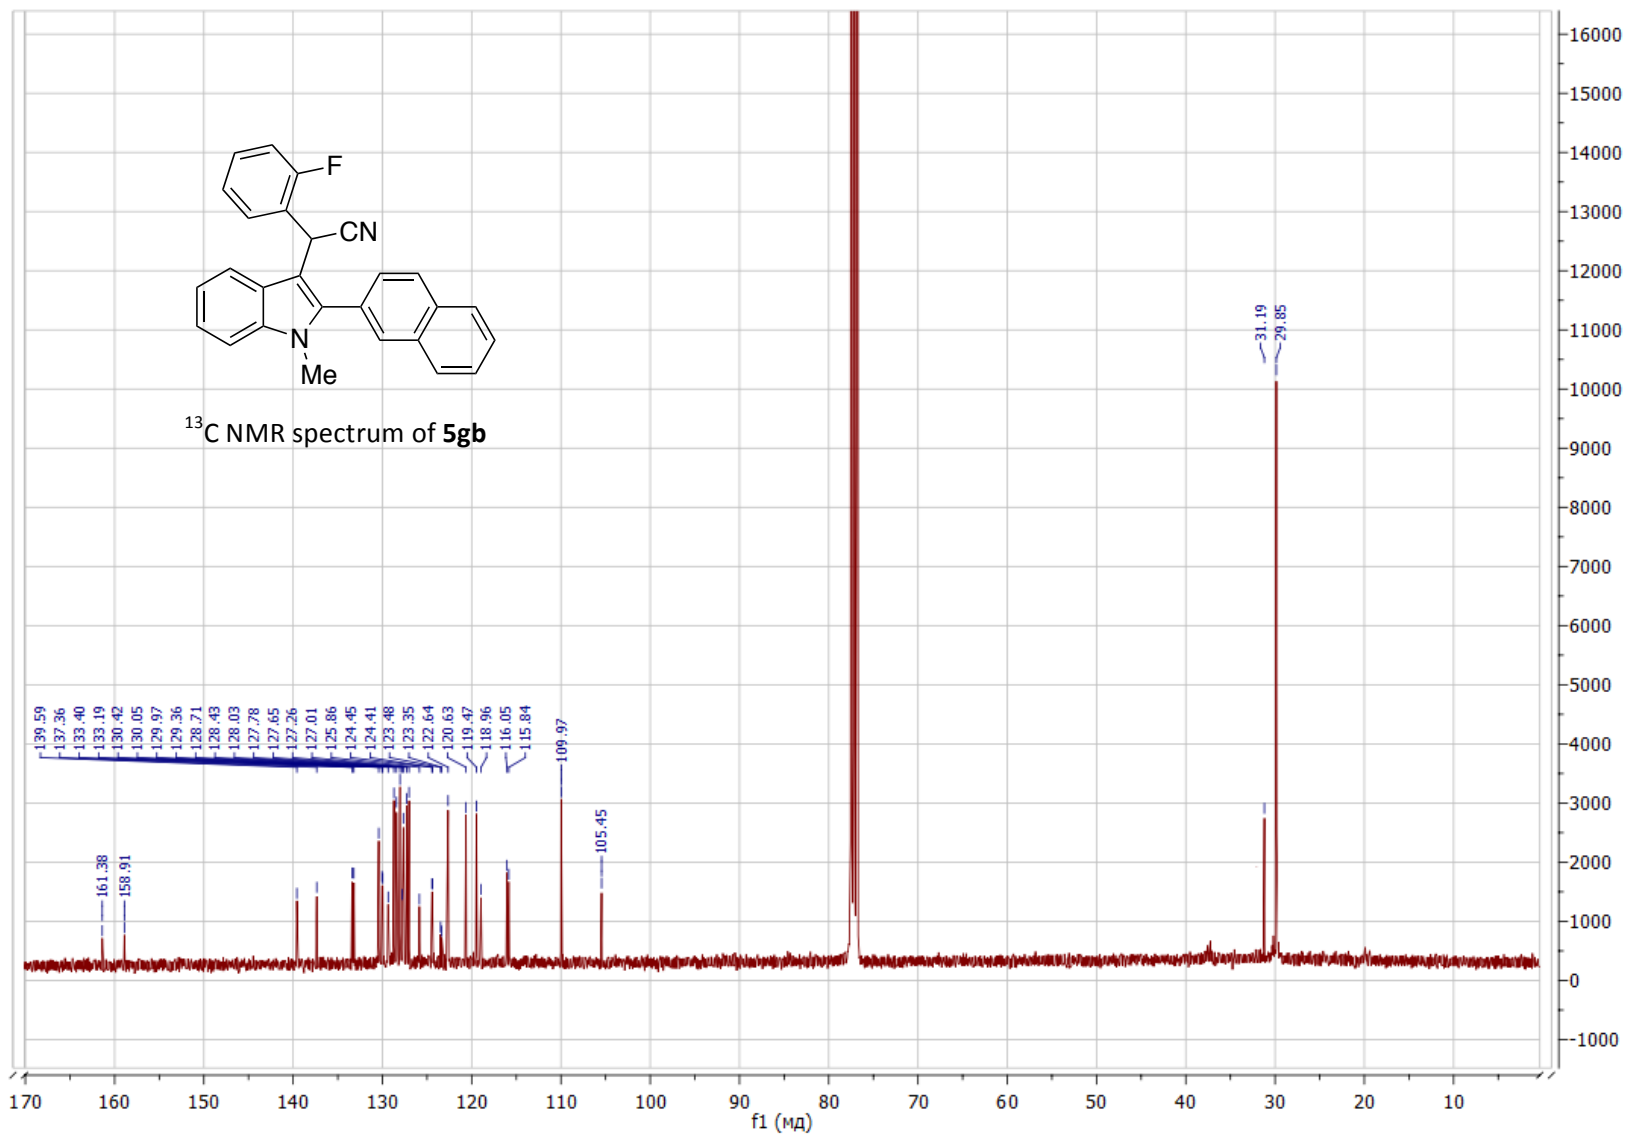

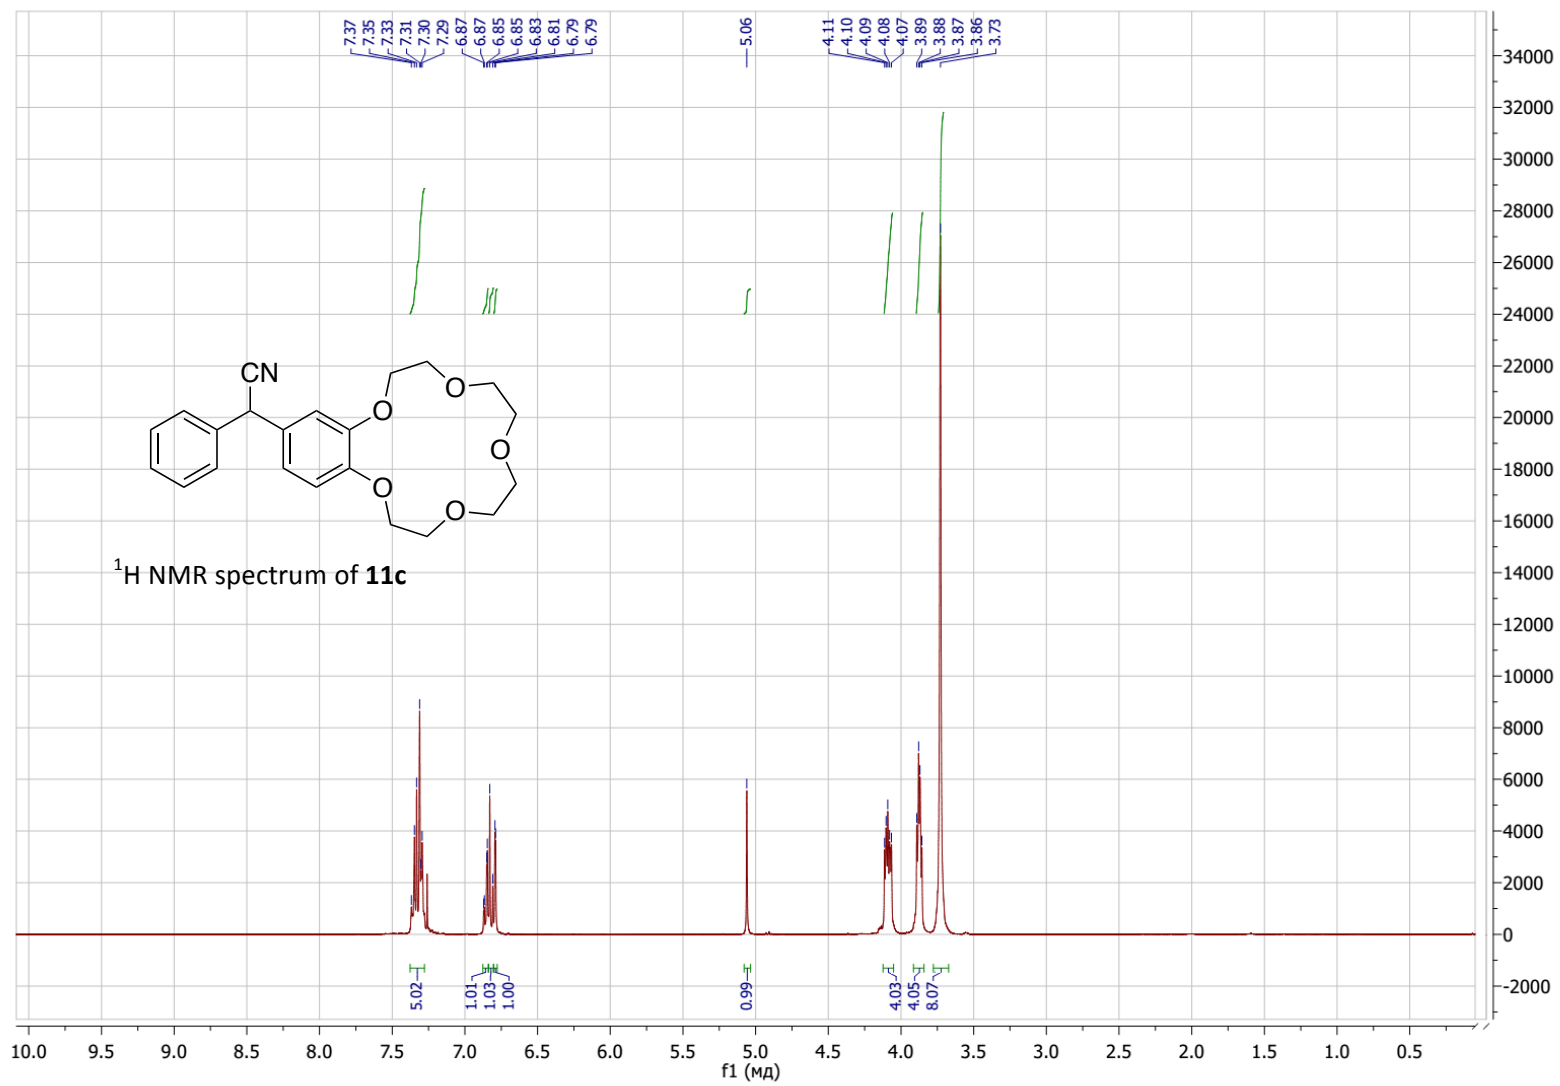

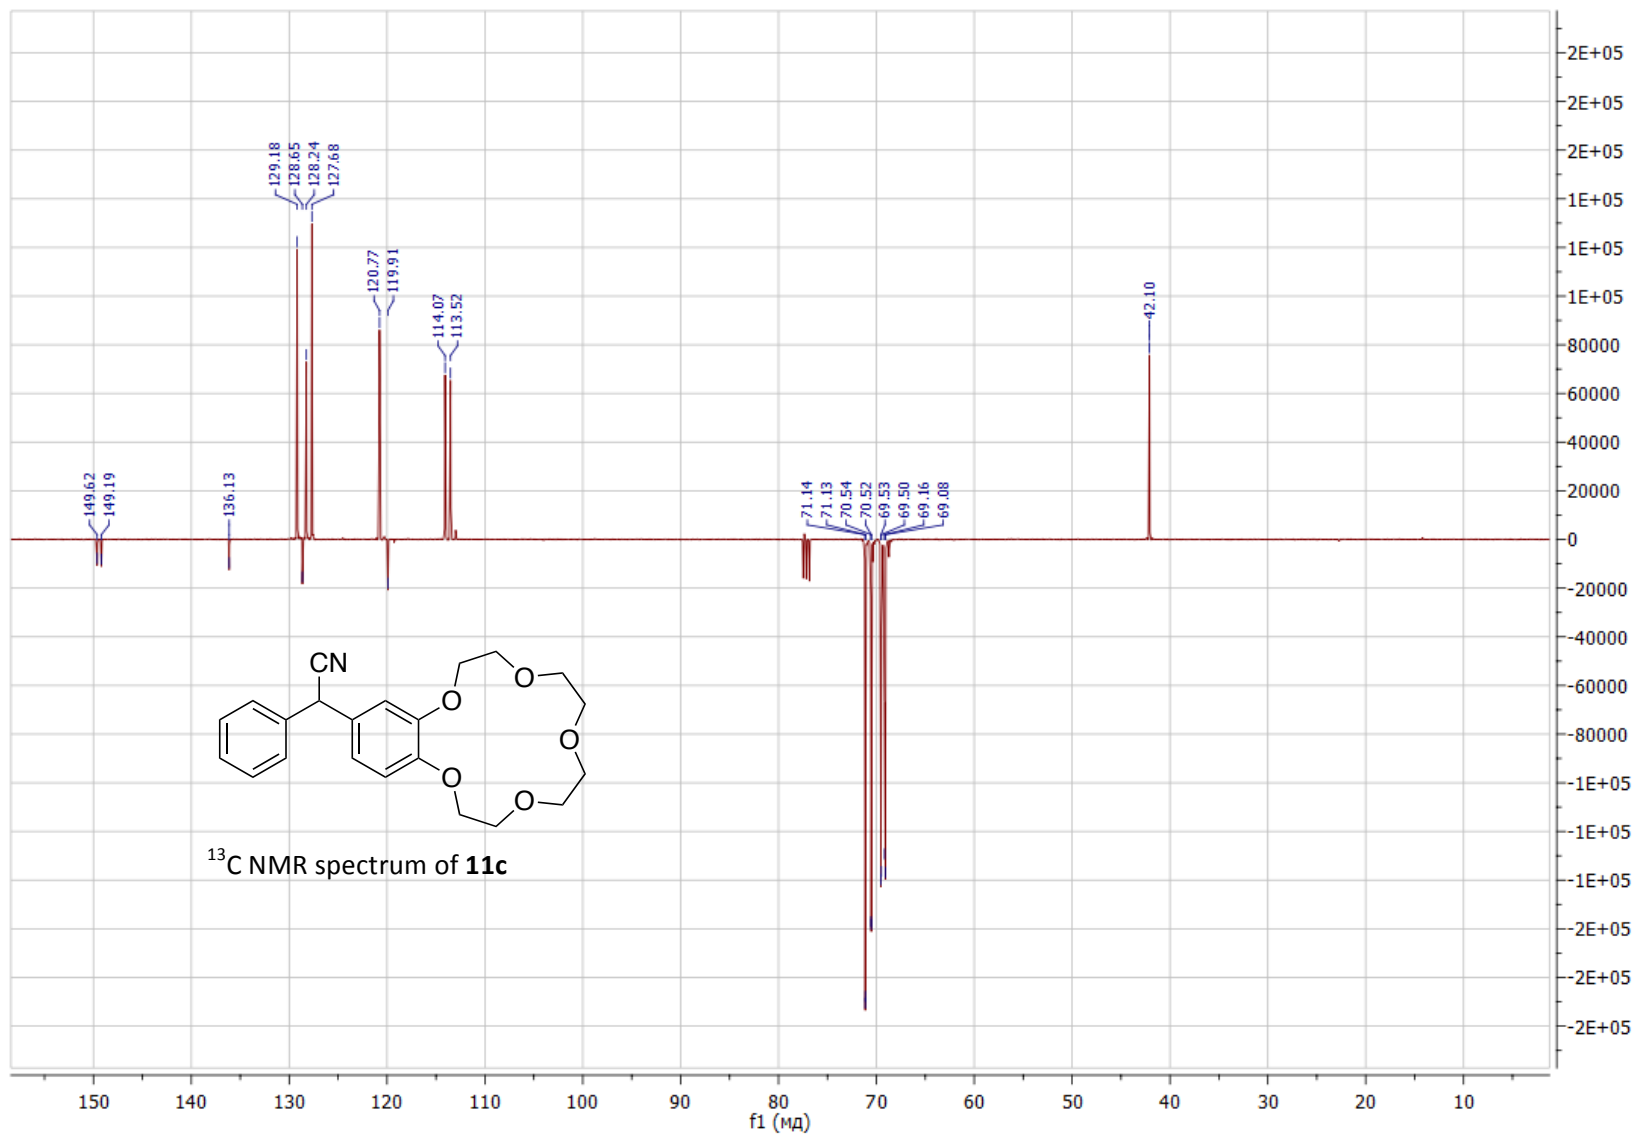

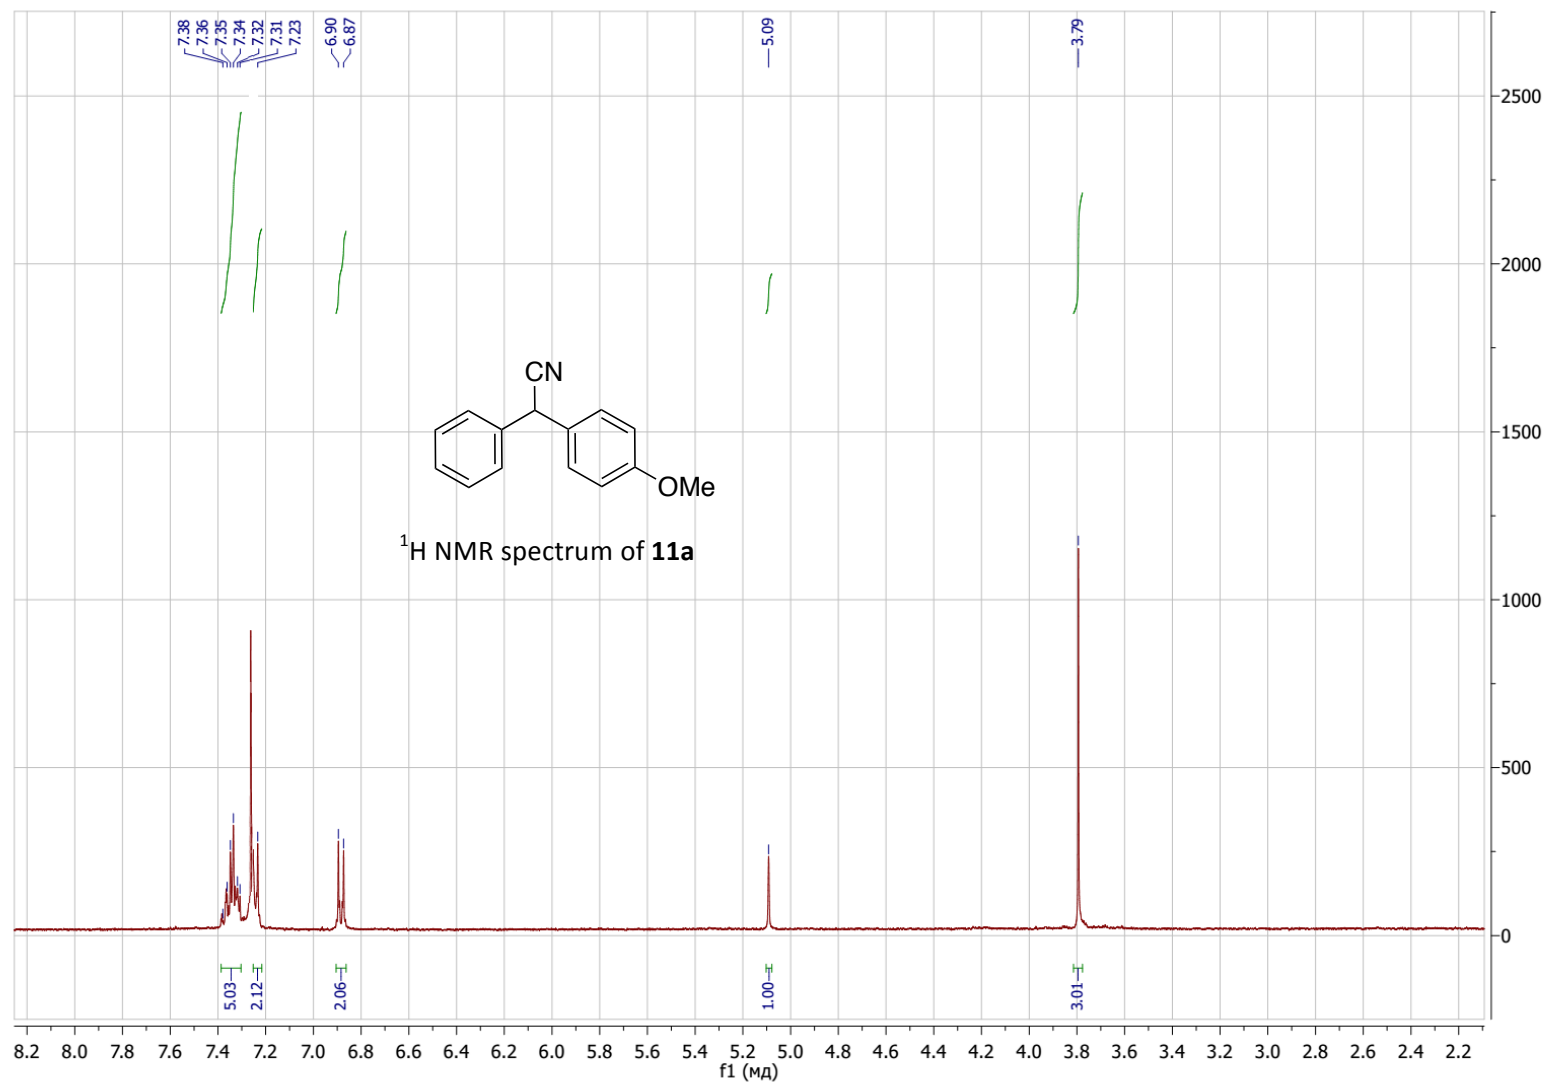



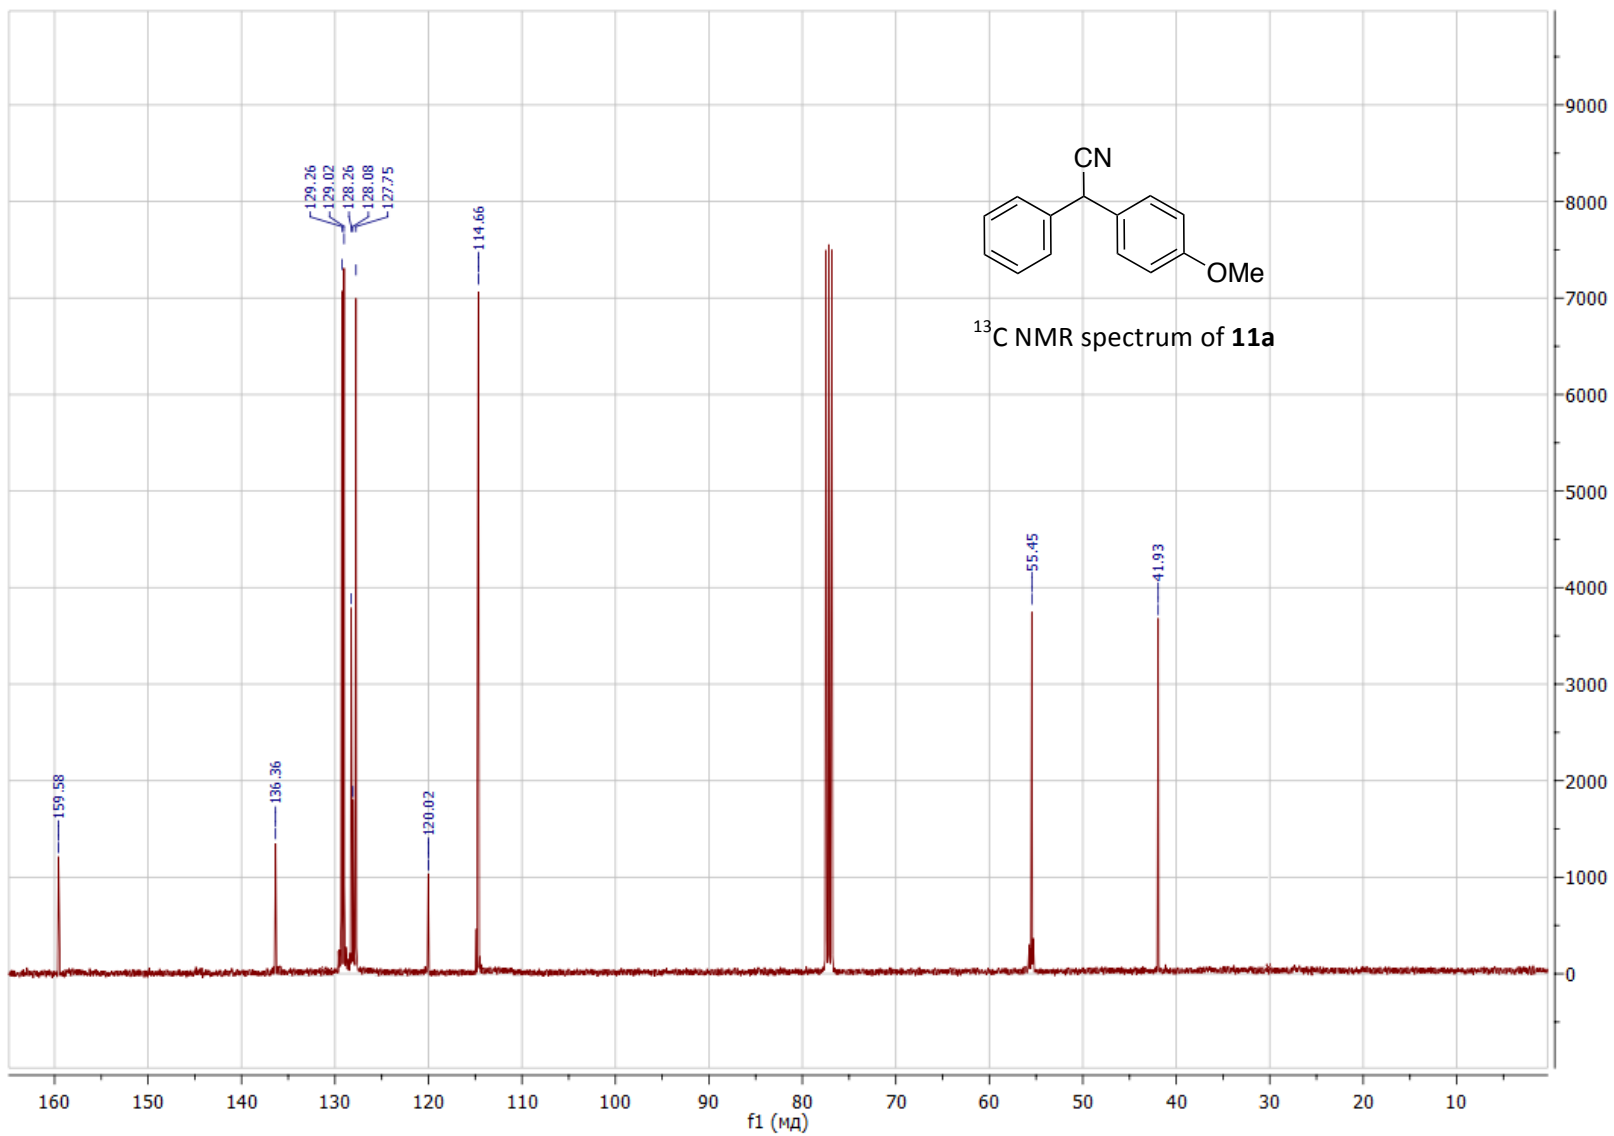

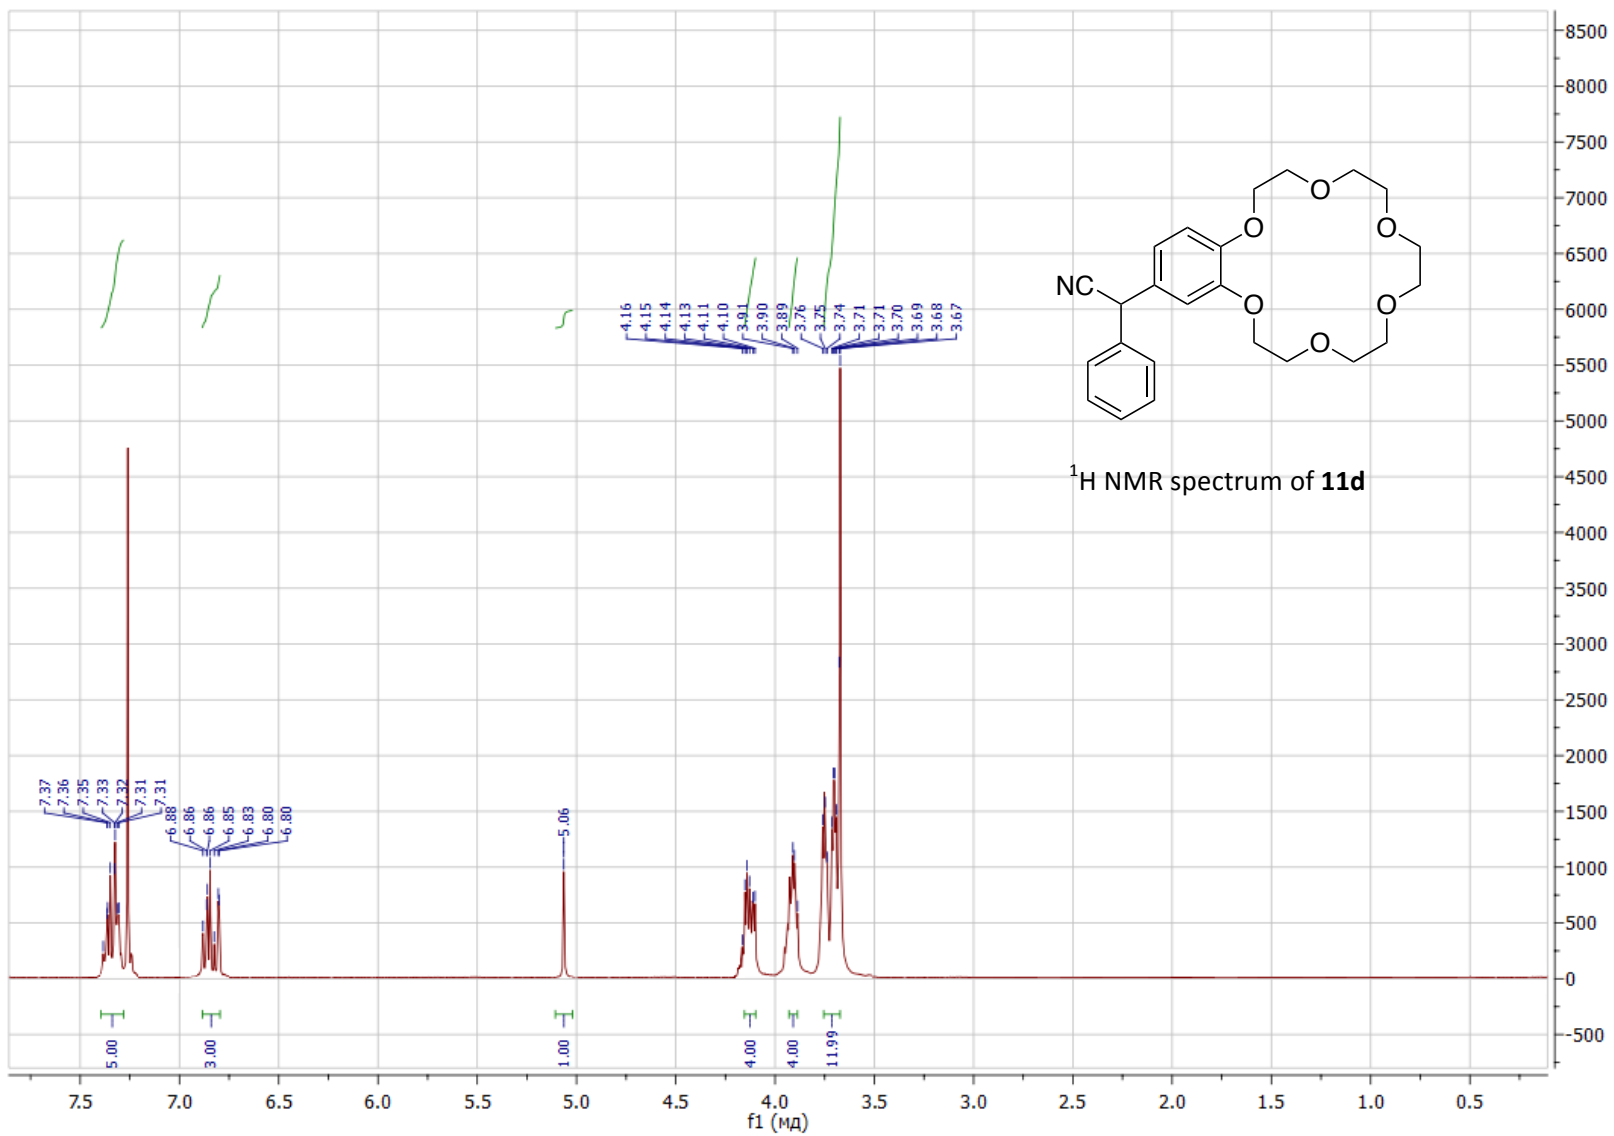

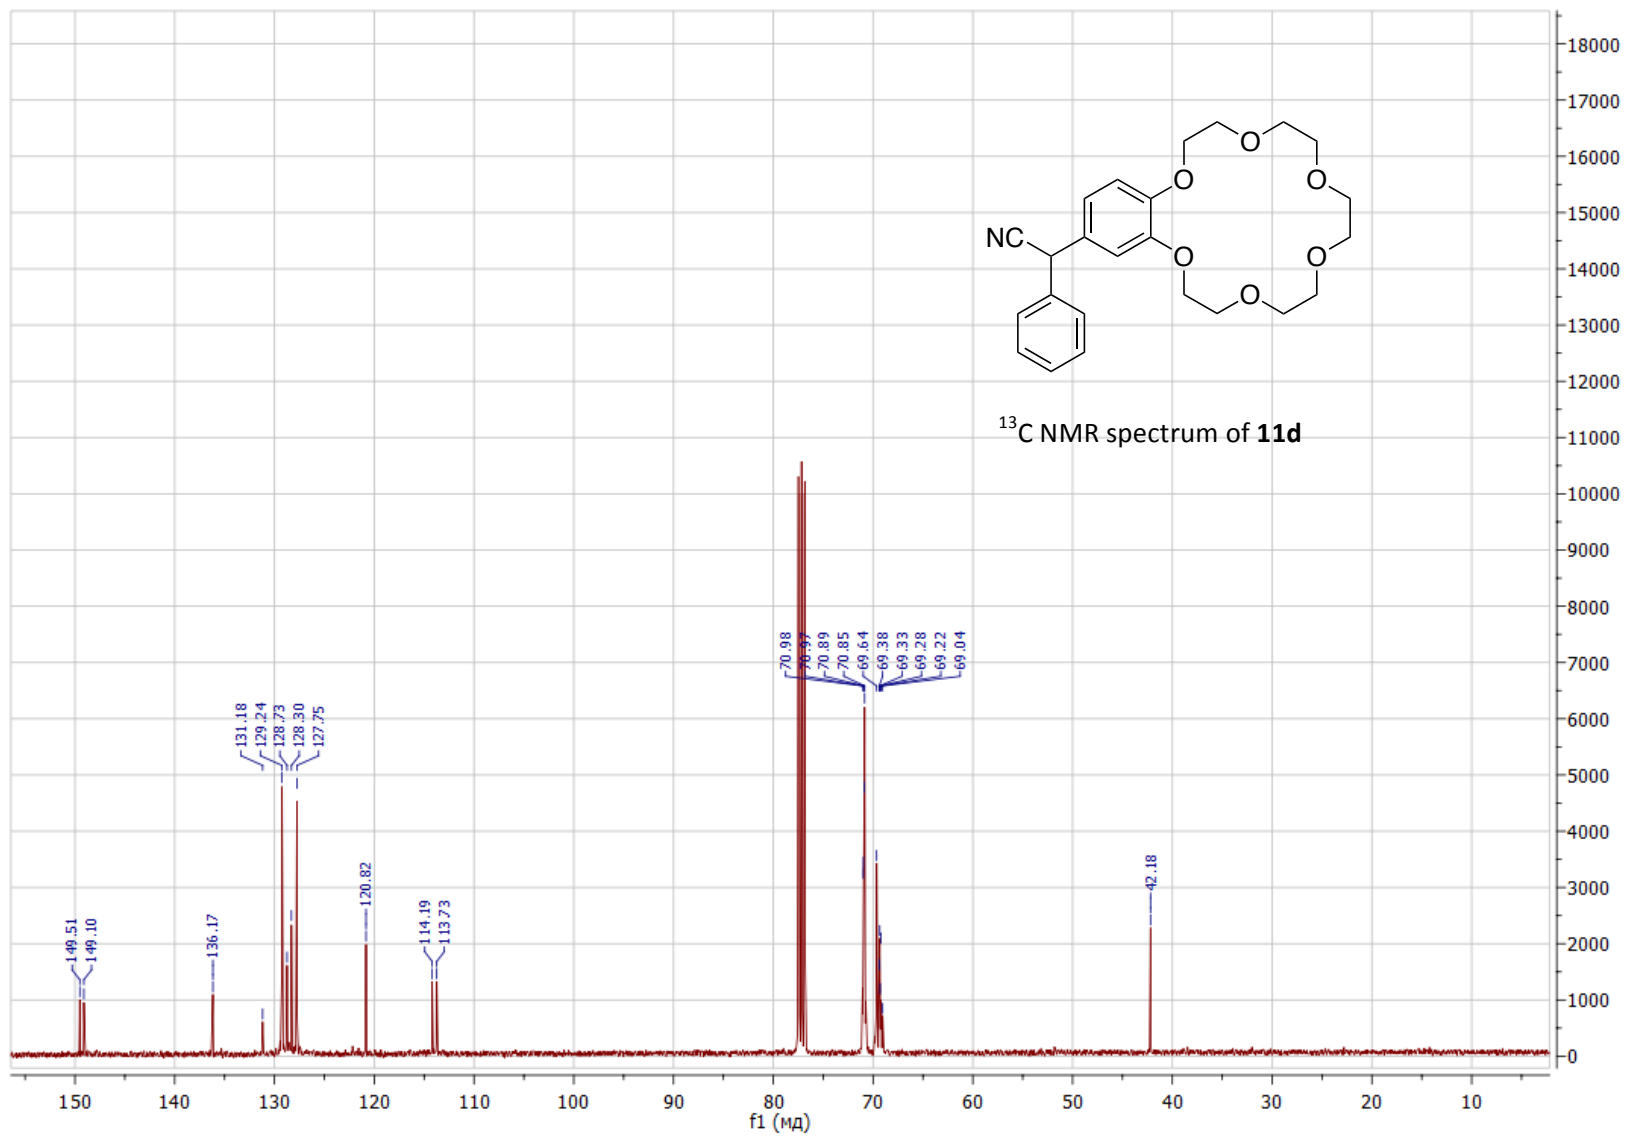

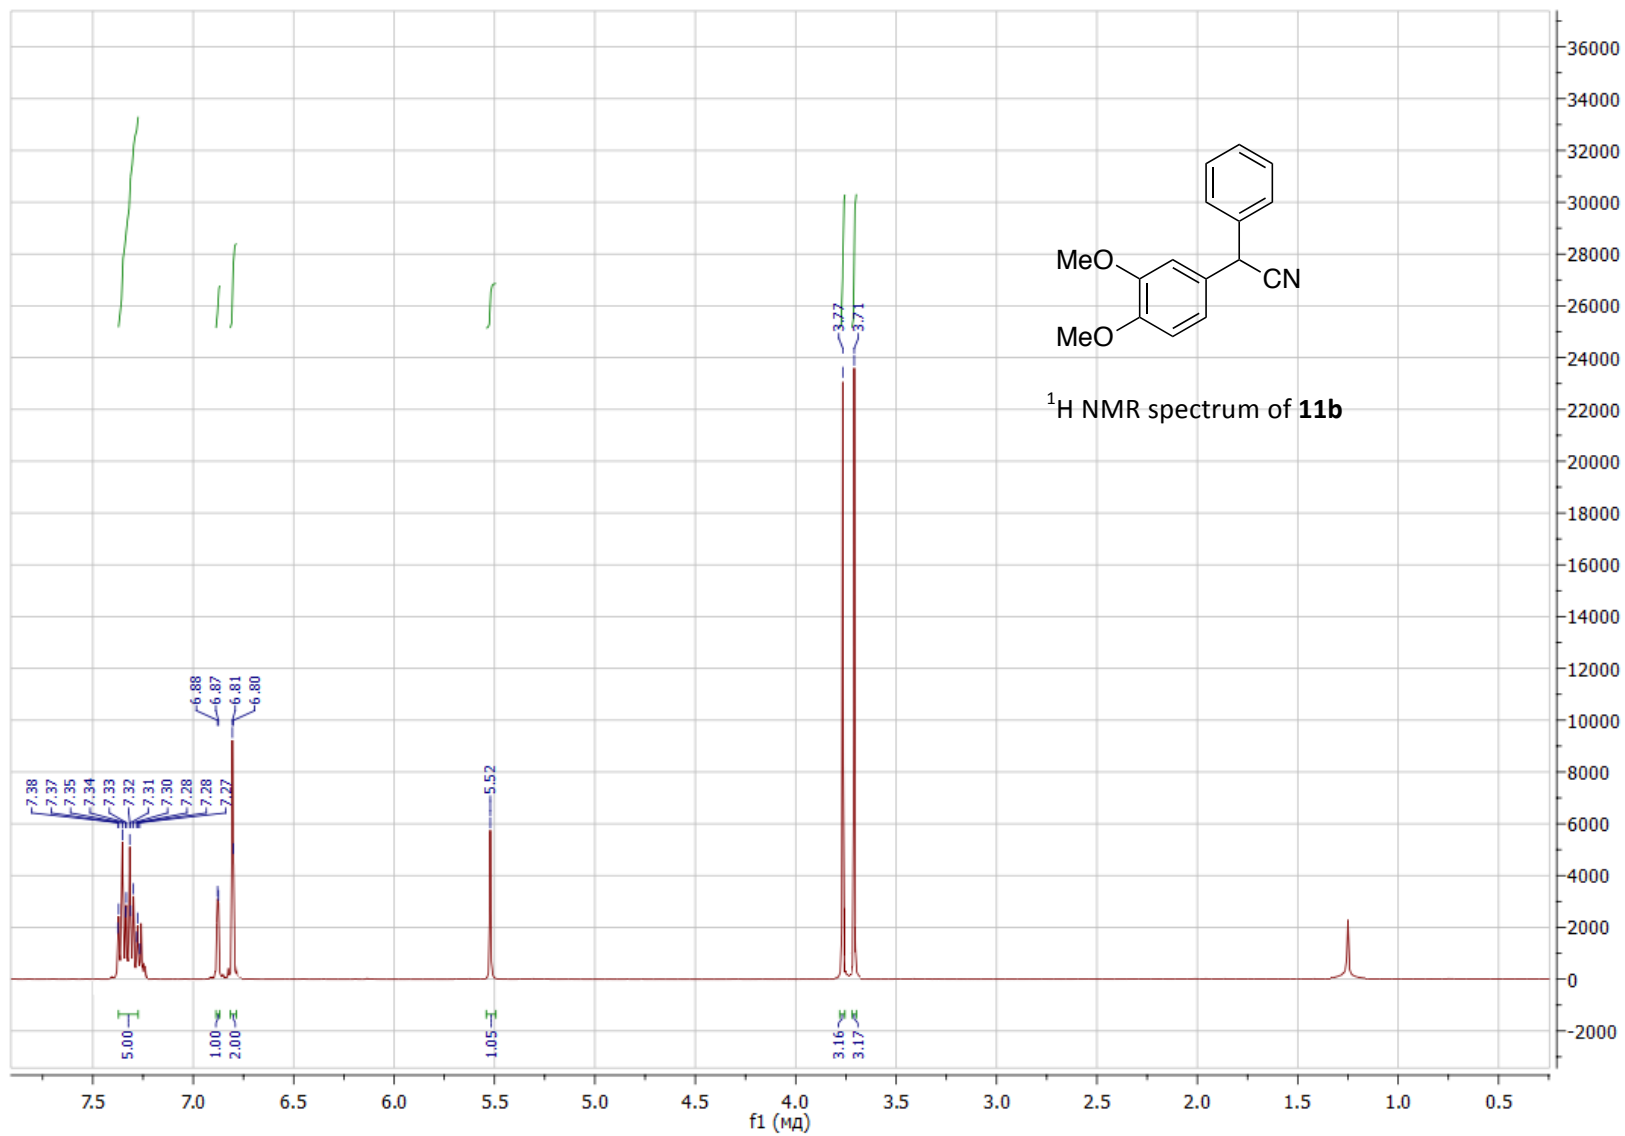

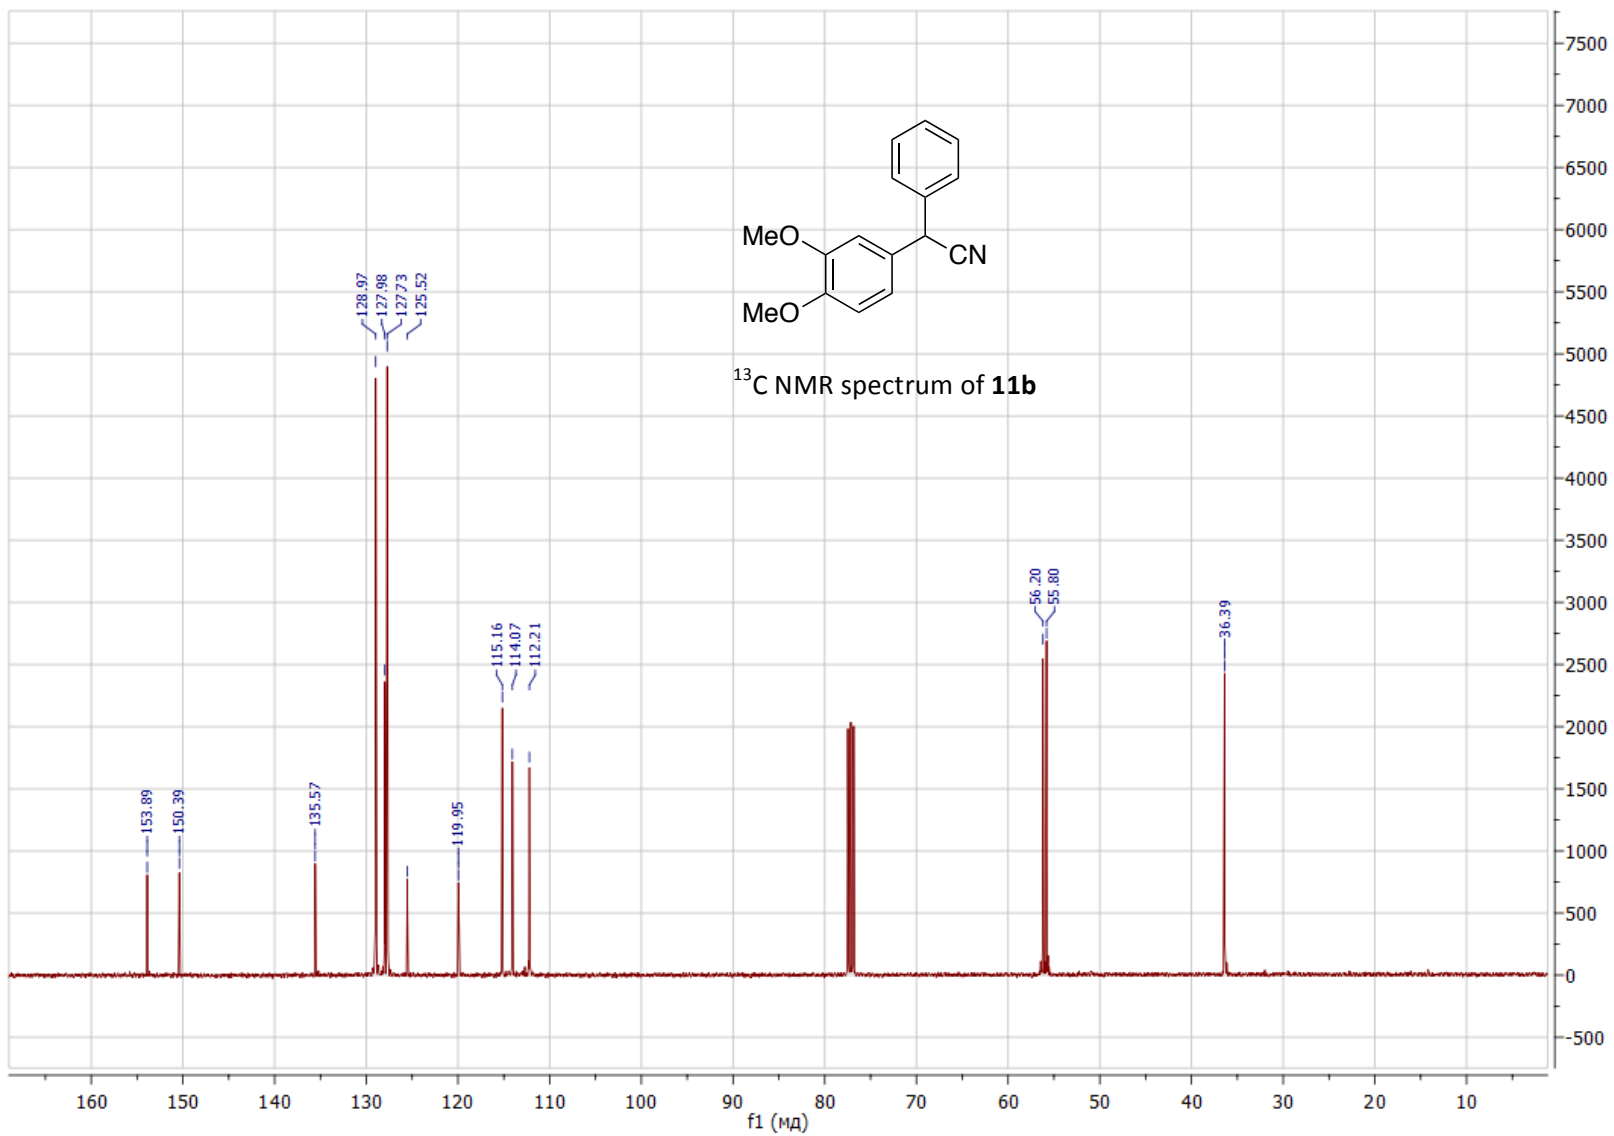

## HRMS Spectral Charts

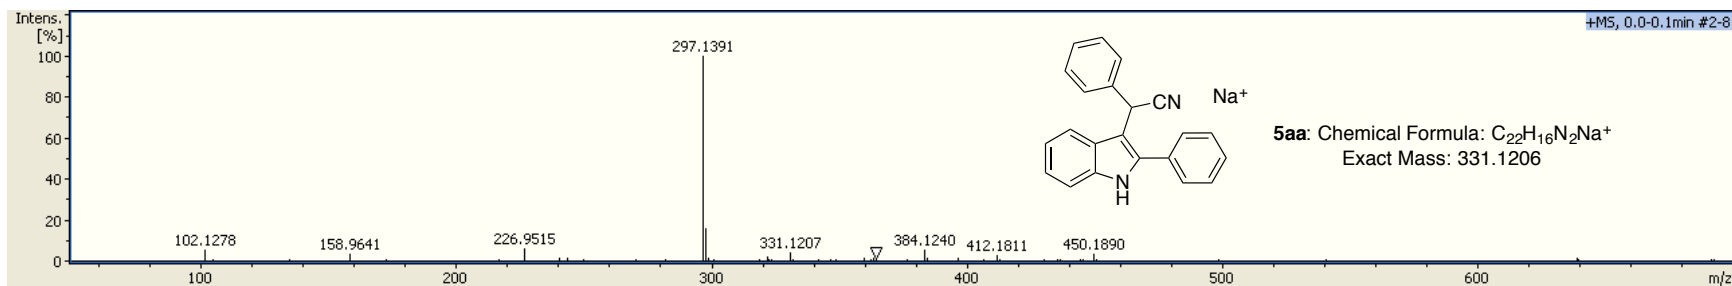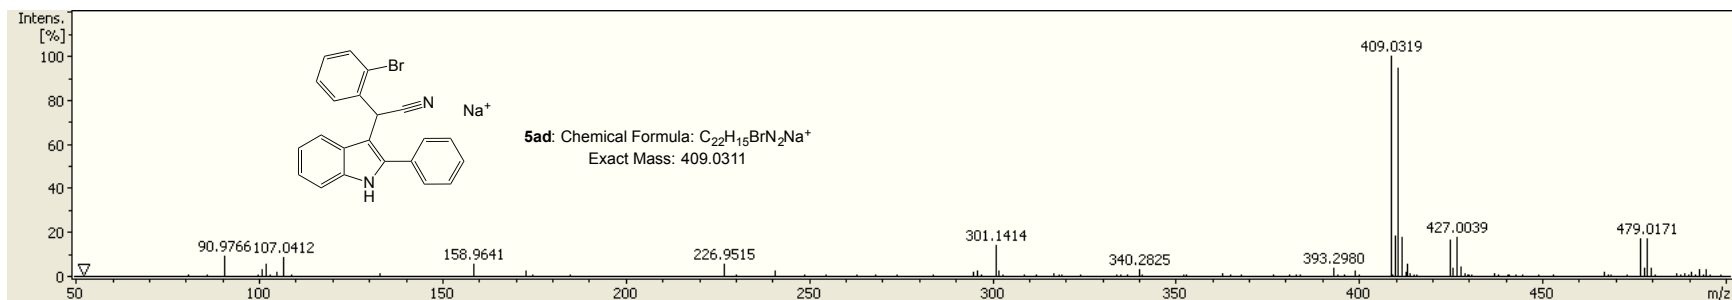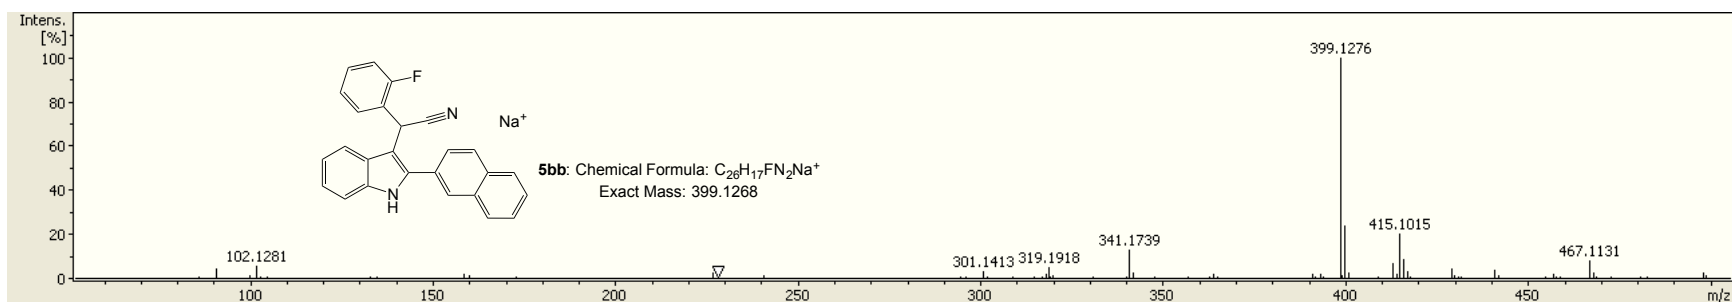

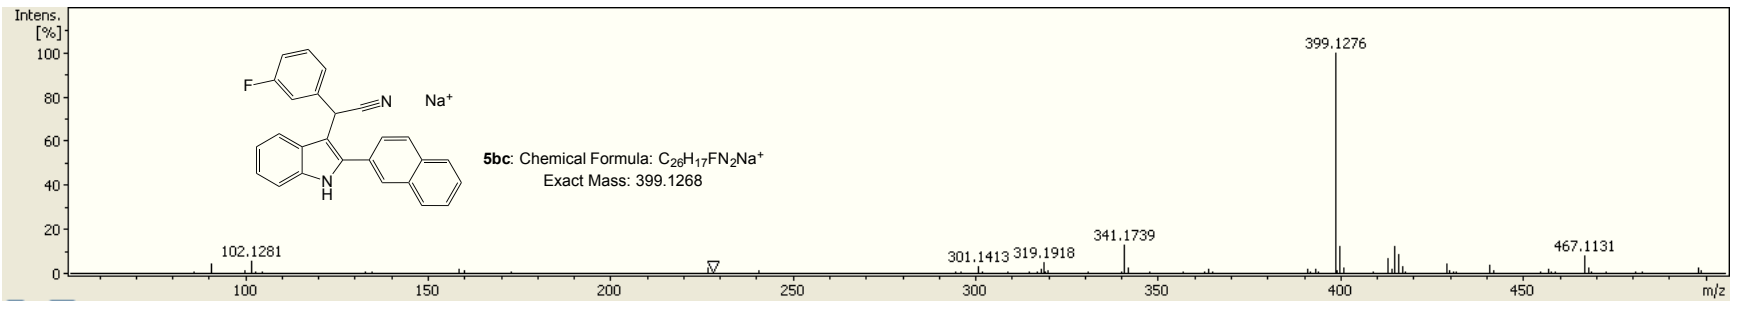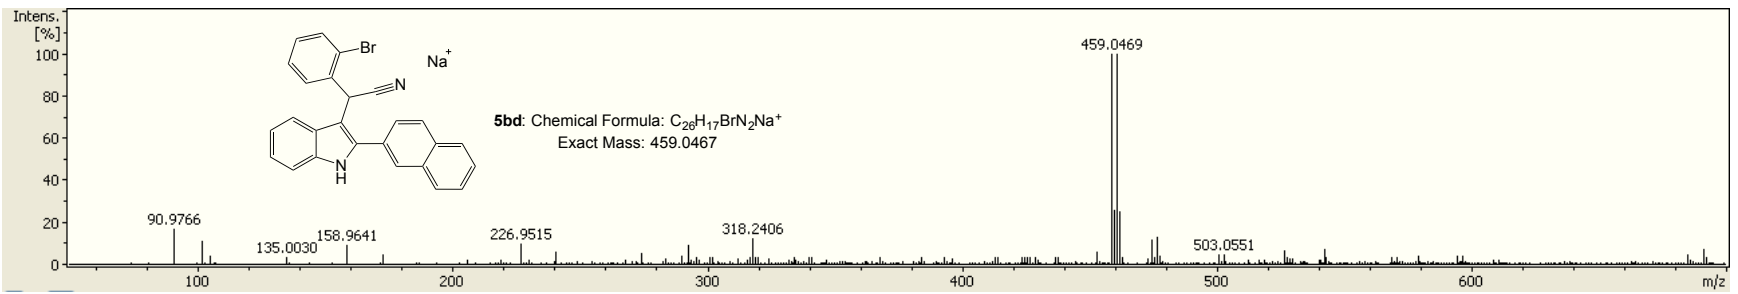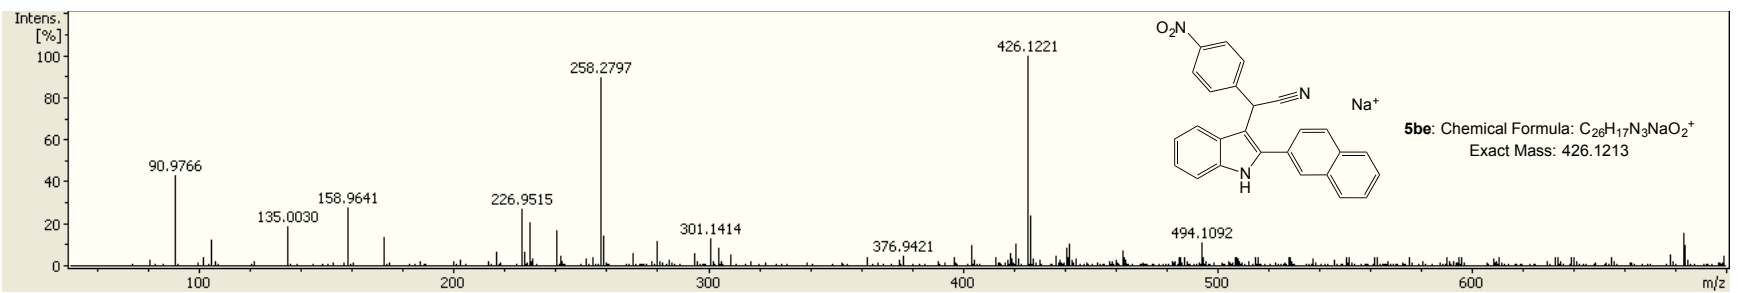

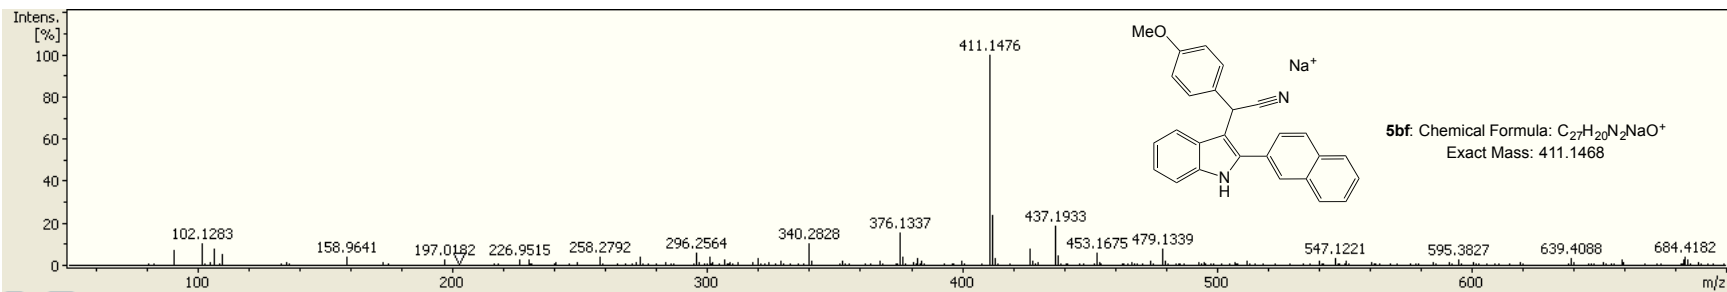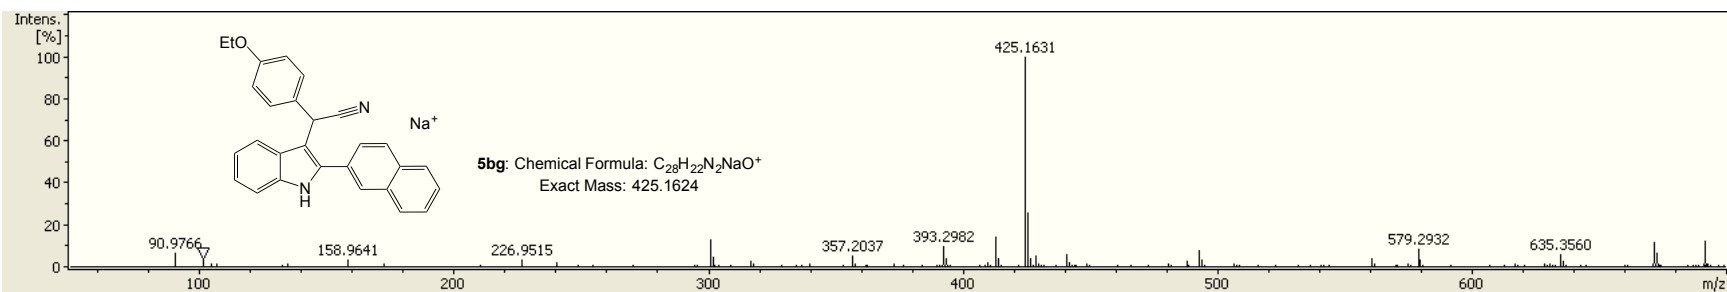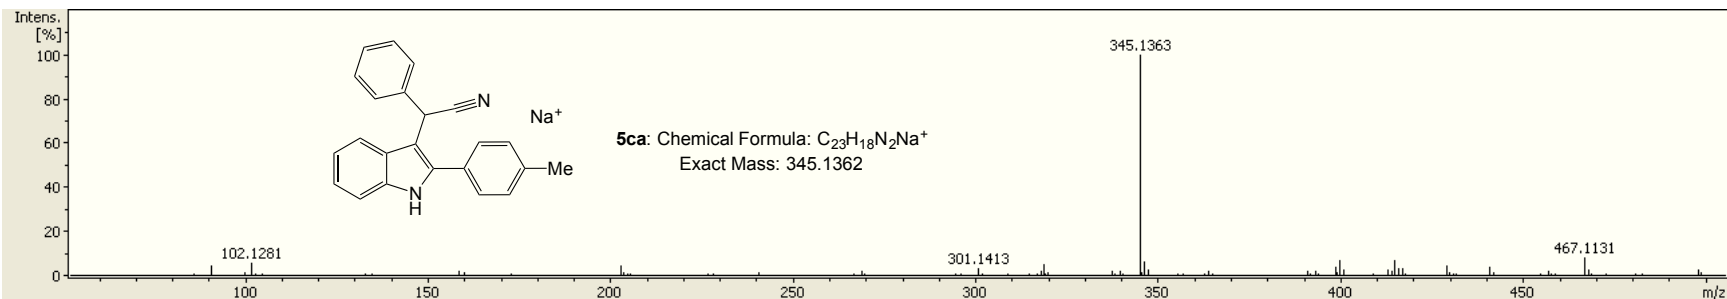



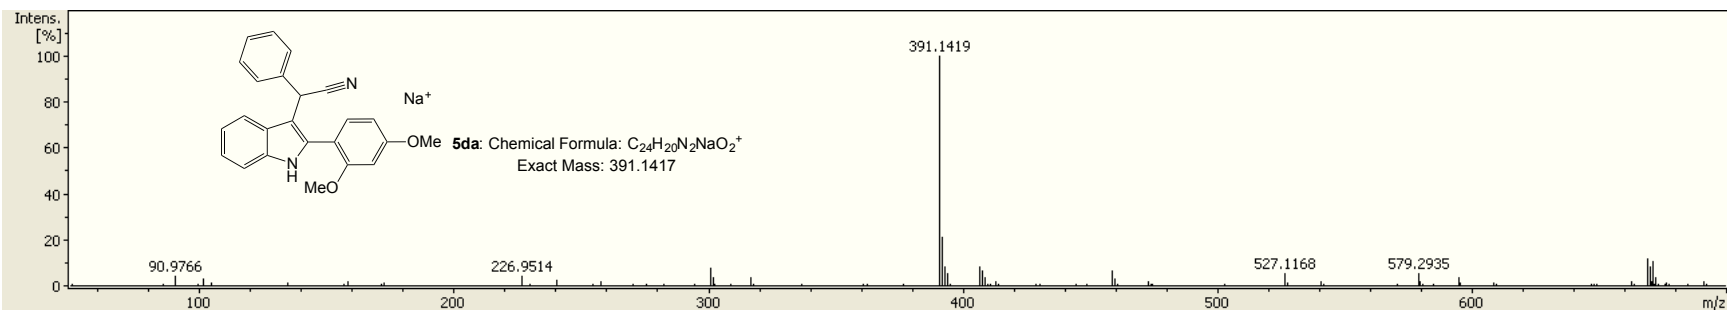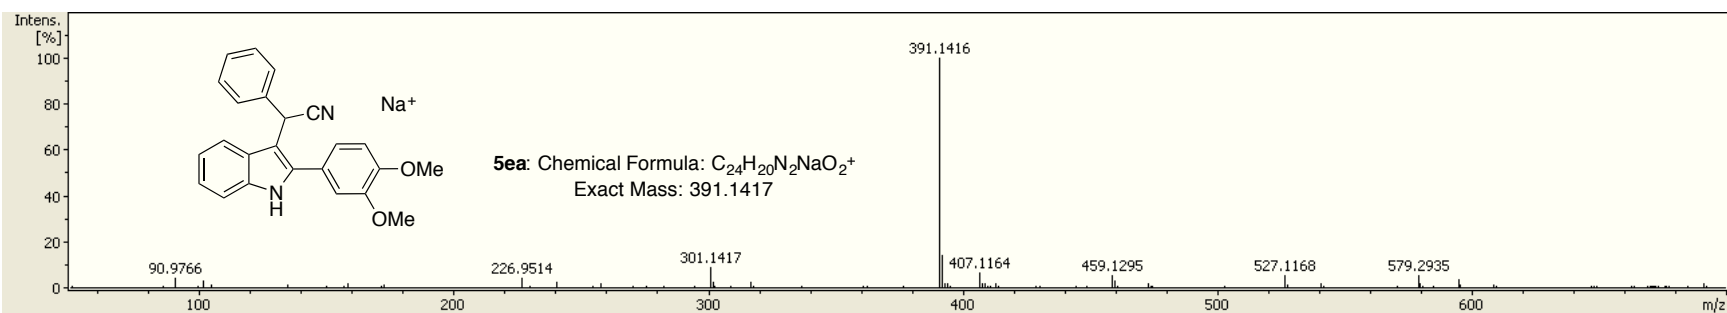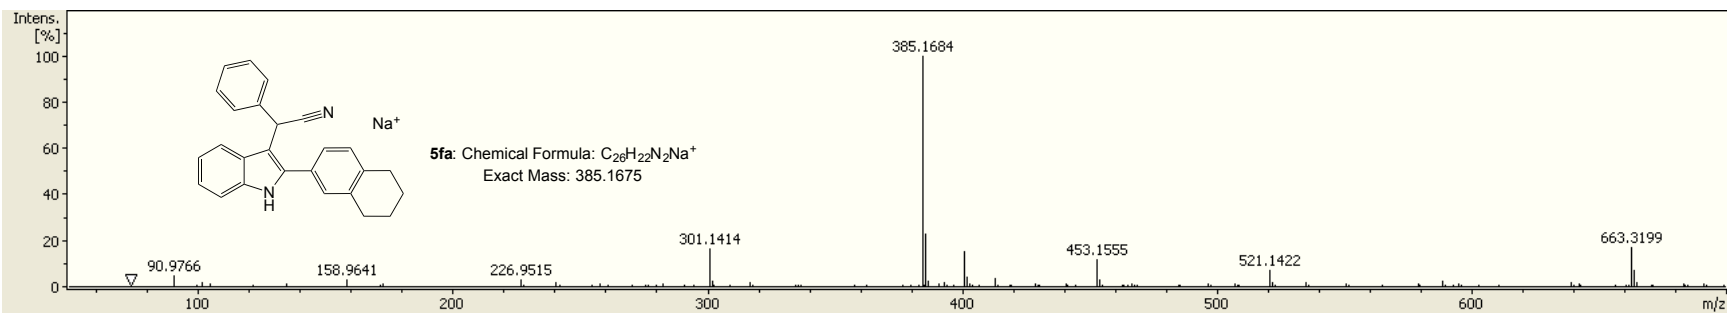

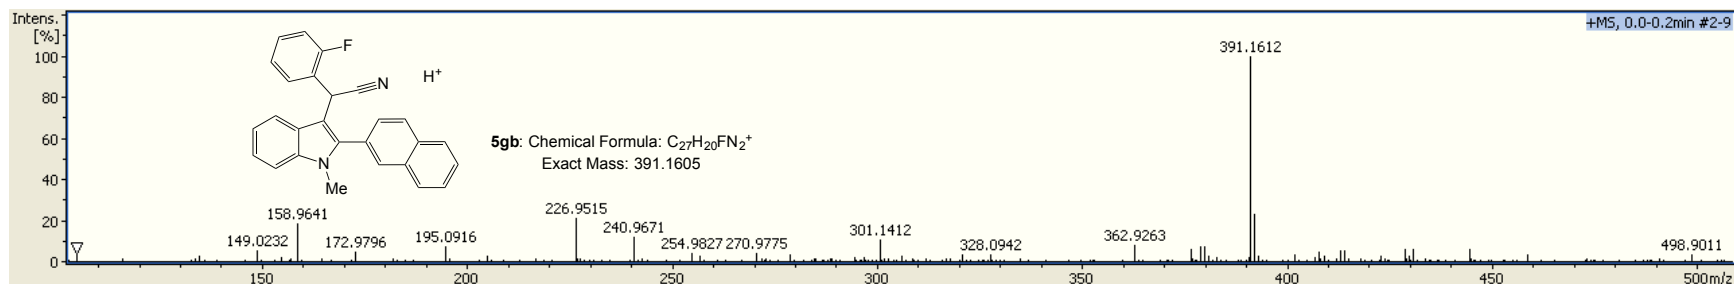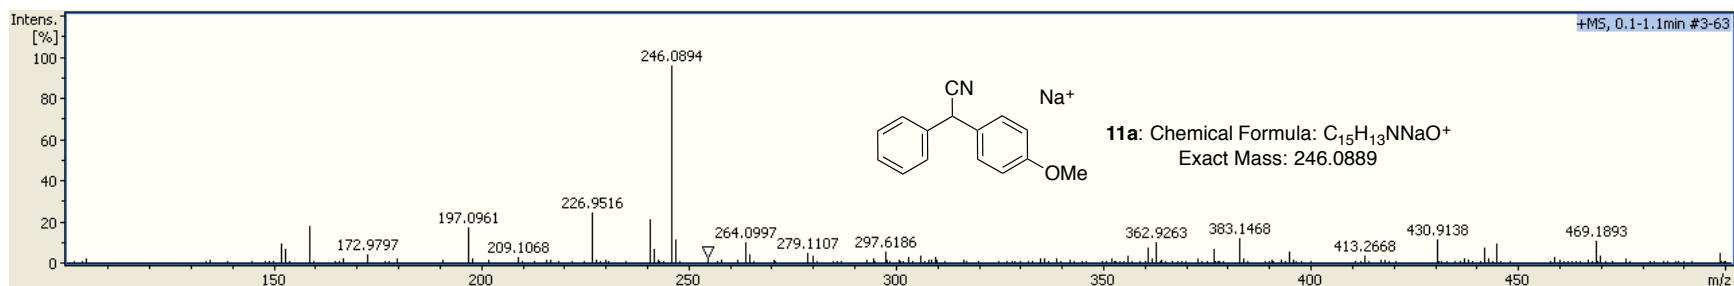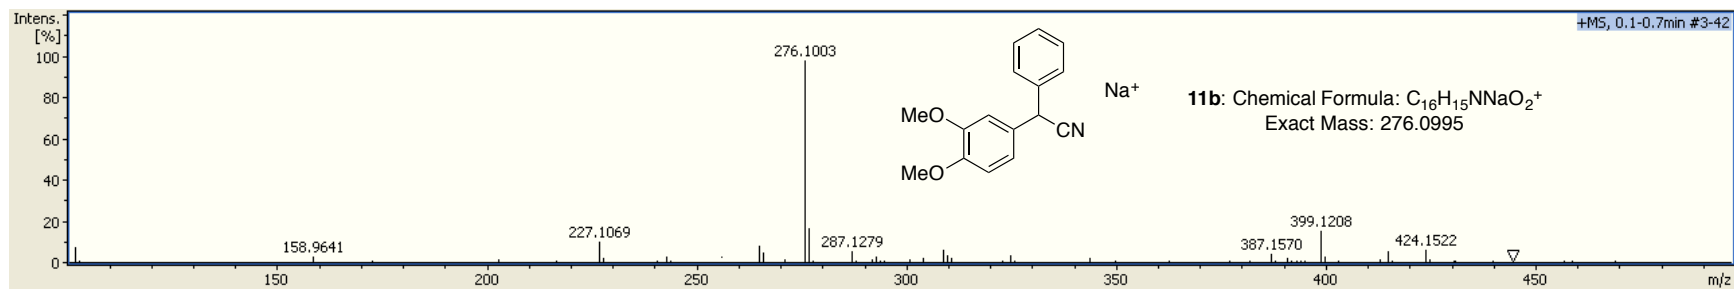

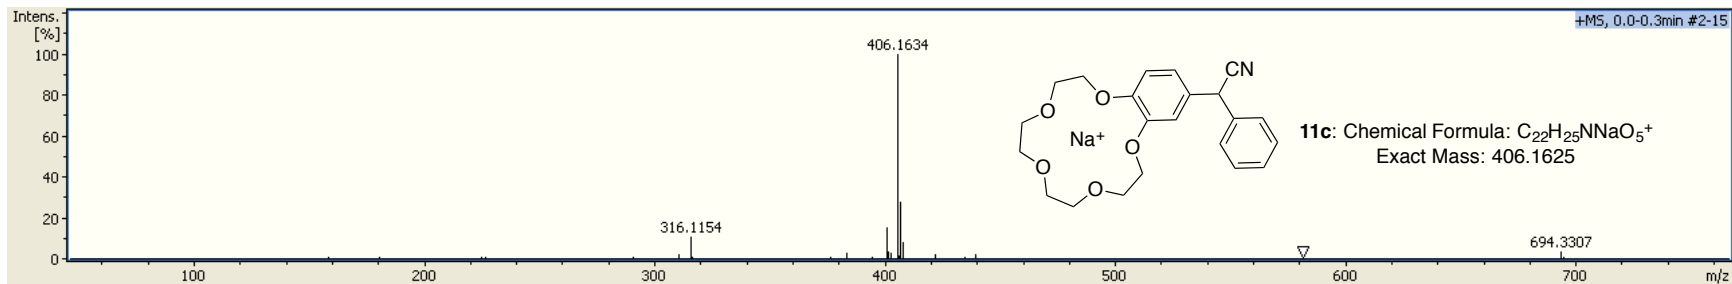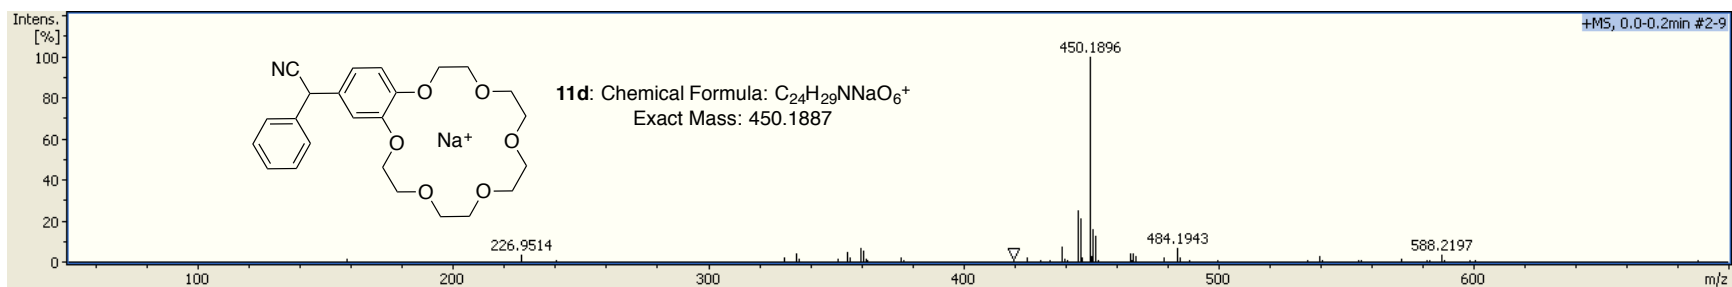

Supplement: c5ra20953f1.pdf [file c5ra20953f1.pdf]
